# Supplementary material for: Playing by the rules? Phenotypic adaptation to temperate environments in an American marsupial
Source: PeerJ. 2018 Mar 27;6:e4512. doi: 10.7717/peerj.4512 (PMC5877449; doi:10.7717/peerj.4512)
Supplement: Dataset S1 [file peerj-06-4512-s001.xlsx]

## Sheet: Data_key
Datasets for Nigenda-Morales et al. "Playing by the rules? Phenotypic adaptation to temperate environments in an American marsupial"
Dimension_data and Pigmentation_data sheets contain the raw data for dimension and pigmentation traits, respectively.
Dimension_residuals_average sheet contains the dimension traits average residuals for the specimens that had the same geographic location.
Pigmentation_average sheet contains the pigmentation traits average data for the specimens that had the same geographic location.
Headers of the columns for all sheets in the excel file :
ID	Museum identification number
COLL	Collection (AMNH = American Museum of Natural History, CNMA = Colección Nacional de Mamíferos (UNAM, Mexico), MALH = Museo de Zoología “Alfonso L. Herrera” (UNAM. Mexico), MVZ = Museum of Vertebrate Zoology (UC-Berkeley), USNM = Smithsonian Museum of Natural History)
SPCMNUM	Specimen Number
LAT	Latitude
LONG	Longitude
CNTRY	Country where the specimen was collected
POPLAT	Latitudinal group
SEX	Sex
BL	Body length (cm)
TL	Tail length (cm)
BERL	Ear length (cm)
HFTL	Hindfoot length (cm)
DTL	Tail pigmentation length (cm)
DTLR	Proportion of tail pigmentation
ERPIG	Ear pigmentation length (cm)
ERPIGBR	Proportion of ear pigmentation
MTL	Ventral middle toe length (cm)
MTPIG	Ventral middle toe pigmentation length (cm)
MTPIGR	Proportion ventral middle toe pigmentation
MTLB	Dorsal middle toe length (cm)
MTPIGB	Dorsal middle toe pigmentation length (cm)
MTPIGBR	Proportion dorsal middle toe pigmentation
FL	Face lightness
ChL	Cheek ligthness
TeL	Temporal region lightness
AVGL	Toso average lightness
Bio1	Annual mean temperature
Bio2	Mean diurnal range
Bio4	Temperature seasonality
Bio10	Mean temperature warmest quarter
Bio11	Mean temperature of coldest quarter
Bio12	Annual precipitation
Bio15	Precipitation seasonality
Bio19	Precipitation of coldest quarter
NDVIMAX	Normalized difference vegetation index maximum value
ROUGH	Surface moisture
ELEV	Elevation
TREECOV	Percent tree cover
Headers of the columns for the Dimension_residuals_averaged sheet:
BLSEXRES	Body length residuals
TLSEXRES	Tail lenght residuals
HFTLSEXRES	Hinfoot lenght residuals
BERLSEXRES	Ear length residuals

## Sheet: Dimension_data
ID	COLL	SPCMNUM	LAT	LONG	CNTRY	POPLAT	SEX	BL	TL	BERL	HFTL	Bio1	Bio2	Bio4	Bio10	Bio11	Bio12	Bio15	Bio19	NDVIMAX	ROUGH	ELEV	TREECOV
AMNH_001	AMNH	42270	40.3808	-84.8649	USA	H	F	47.8	32.8	NA	5.4	98	114	9501	215	-30	933	22	169	7628	-872	296	0
AMNH_003	AMNH	135053	39.179	-96.5979	USA	H	M	NA	32.88	4.3	6	120	130	10015	246	-14	861	52	70	7288	-985	345	5
AMNH_005	AMNH	142645	39.179	-96.5979	USA	H	M	58.2	21.9	2.8	5.3	120	130	10015	246	-14	861	52	70	7288	-985	345	5
AMNH_006	AMNH	142644	39.179	-96.5979	USA	H	F	43.4	29.4	3.1	5.4	120	130	10015	246	-14	861	52	70	7288	-985	345	5
AMNH_007	AMNH	121735	41.9376	-85.0112	USA	H	F	52.4	25.9	3.2	5.2	86	111	9520	204	-41	896	23	151	7061	-887	295	1
AMNH_011	AMNH	9071/7378	40.6707	-74.2088	USA	H	M	59.1	31.1	3.2	5.6	118	105	8784	229	2	1181	11	260	3739	-396	11	14
AMNH_012	AMNH	3596/2791	40.6707	-74.0114	USA	H	F	49.4	26.9	3.3	5.1	121	88	8735	232	7	1146	10	256	1897	-250	6	0
AMNH_013	AMNH	16664	40.6707	-73.9871	USA	H	M	48.9	26.1	3.2	5.4	105	115	9020	219	-17	1165	9	258	7577	-923	48	78
AMNH_014	AMNH	16608	40.6707	-74.3193	USA	H	M	61.1	30	NA	5.4	80	119	9466	198	-47	985	14	200	7418	-954	185	62
AMNH_015	AMNH	16666	40.6707	-73.9871	USA	H	M	55.2	28.3	3.2	NA	105	115	9020	219	-17	1165	9	258	7577	-923	48	78
AMNH_016	AMNH	180142	40.6707	-73.7984	USA	H	M	51.9	27.2	3	4.7	102	104	8808	213	-12	1245	8	279	9009	-867	149	71
AMNH_017	AMNH	180141	40.6707	-73.7984	USA	H	M	47.7	26.8	3.5	4.7	102	104	8808	213	-12	1245	8	279	9009	-867	149	71
AMNH_018	AMNH	1233	40.6707	-72.9922	USA	H	F	48.3	28.9	3.2	5.3	108	97	8370	214	-1	1153	8	281	8342	-1360	38	23
AMNH_021	AMNH	146632	40.6707	-73.6692	USA	H	F	56.7	32.3	NA	6.1	102	114	8825	213	-15	1188	8	269	8593	-862	97	53
AMNH_024	AMNH	129388	40.6707	-73.7743	USA	H	M	54.8	28.5	3.3	5.7	100	111	8849	212	-17	1207	8	270	9072	-830	148	38
AMNH_025	AMNH	16594	40.6707	-75.6867	USA	G	M	58.7	33.4	NA	5.8	170	86	6719	253	83	1396	16	333	7620	-2161	3	54
AMNH_026	AMNH	16595	40.6707	-75.6867	USA	G	M	60.4	34.1	NA	6.6	170	86	6719	253	83	1396	16	333	7620	-2161	3	54
AMNH_027	AMNH	16596	40.6707	-75.6867	USA	G	M	49.2	23.9	NA	4.4	170	86	6719	253	83	1396	16	333	7620	-2161	3	54
AMNH_029	AMNH	147741	40.6707	-78.8157	USA	G	M	49.4	39.8	3.6	5.6	157	127	7467	251	58	1169	18	276	7462	-882	41	7
AMNH_030	AMNH	147743	40.6707	-78.8157	USA	G	F	52.3	30.3	3.9	5.5	157	127	7467	251	58	1169	18	276	7462	-882	41	7
AMNH_031	AMNH	147744	40.6707	-78.8157	USA	G	F	51.8	30.1	3.6	5.1	157	127	7467	251	58	1169	18	276	7462	-882	41	7
AMNH_034	AMNH	149377	40.6707	-83.6374	USA	G	F	41.9	30	NA	4.9	132	135	7577	227	31	1282	14	330	8499	-874	402	71
AMNH_035	AMNH	8653	40.6707	-98.4723	USA	E	M	49.8	36.9	4.3	6	206	121	6590	288	120	696	33	126	5525	-649	215	4
AMNH_036	AMNH	8651	40.6707	-98.4723	USA	E	M	51.6	29.7	4	5.6	206	121	6590	288	120	696	33	126	5525	-649	215	4
AMNH_038	AMNH	14827	40.6707	-98.4723	USA	E	F	43.1	32.2	4.1	5	206	121	6590	288	120	696	33	126	5525	-649	215	4
AMNH_039	AMNH	126141	40.6707	-87.2577	HON	A	F	40.6	32.8	3.6	4.8	225	117	1428	241	204	1182	70	117	7344	-960	866	21
AMNH_040	AMNH	126189	40.6707	-87.2577	HON	A	F	48.6	35.1	3.4	5.8	225	117	1428	241	204	1182	70	117	7344	-960	866	21
AMNH_041	AMNH	146585	40.6707	-88.3899	BEL	B	M	45.7	31.9	3.9	5.1	254	93	1570	270	232	1354	58	238	7632	-943	9	22
AMNH_042	AMNH	128477	40.6707	-87.2577	HON	A	M	48.3	33.3	NA	5.4	225	117	1428	241	204	1182	70	117	7344	-960	866	21
AMNH_043	AMNH	128476	40.6707	-87.2577	HON	A	F	42.3	30.8	3.6	4.7	225	117	1428	241	204	1182	70	117	7344	-960	866	21
AMNH_044	AMNH	123286	40.6707	-87.2143	HON	A	M	51.8	39.8	3.2	5.7	219	111	1308	232	201	1010	82	67	3922	-783	976	1
AMNH_045	AMNH	126193	40.6707	-87.9555	HON	A	F	43.7	31.6	3.1	5.2	198	114	1387	214	180	1449	84	43	8313	-871	1319	19
AMNH_047	AMNH	172153	40.6707	-92.9	MEX	B	M	54.1	38.7	4.1	5.7	180	119	1328	192	160	2181	50	325	8190	-804	1675	17
AMNH_048	AMNH	172160	40.6707	-92.6271	MEX	B	M	58.4	35.1	4.1	5.7	151	130	1198	162	133	1208	72	75	6884	-813	2148	3
AMNH_049	AMNH	126191	40.6707	-87.9082	HON	A	F	42.4	35.4	3.4	4.6	170	103	1467	185	151	1701	80	66	8314	-832	1797	54
AMNH_050	AMNH	128974	40.6707	-88.5848	HON	A	F	48.8	36.7	NA	5	224	123	1534	241	202	1261	74	107	6851	-898	815	29
AMNH_051	AMNH	128976	40.6707	-88.5848	HON	A	F	48.6	35.2	3.9	4.9	224	123	1534	241	202	1261	74	107	6851	-898	815	29
AMNH_052	AMNH	25181	40.6707	-102.329	MEX	C	M	58.1	30.2	NA	5.1	179	162	2455	208	144	950	107	35	7636	-889	1985	16
AMNH_053	AMNH	25182	40.6707	-102.329	MEX	C	M	56.3	29.9	3.4	5.1	179	162	2455	208	144	950	107	35	7636	-889	1985	16
AMNH_054	AMNH	25183	40.6707	-102.329	MEX	C	M	48.2	32.2	NA	5.1	179	162	2455	208	144	950	107	35	7636	-889	1985	16
AMNH_055	AMNH	16625	40.6707	-103.347	MEX	C	F	44.9	32.2	NA	4.2	197	161	2462	225	162	939	111	37	2014	-359	1546	1
AMNH_056	AMNH	16626	40.6707	-103.347	MEX	C	F	43.9	34.2	NA	4.5	197	161	2462	225	162	939	111	37	2014	-359	1546	1
AMNH_057	AMNH	16629	40.6707	-103.347	MEX	C	F	45.7	34.5	NA	4.3	197	161	2462	225	162	939	111	37	2014	-359	1546	1
AMNH_058	AMNH	26017	40.6707	-103.471	MEX	C	M	50.7	30.7	3.2	5.3	194	150	1932	215	165	614	97	49	4960	-827	1514	4
AMNH_059	AMNH	25184	40.6707	-104.51	MEX	C	M	52.8	29.9	NA	5.1	230	167	2461	256	204	882	107	39	8220	-839	1003	35
AMNH_060	AMNH	25188	40.6707	-104.51	MEX	C	M	54.3	38.1	NA	5	230	167	2461	256	204	882	107	39	8220	-839	1003	35
AMNH_061	AMNH	25852	40.6707	-104.433	MEX	C	F	47.6	39.2	NA	4.8	162	143	1970	184	150	1064	105	61	8425	-842	1937	37
AMNH_062	AMNH	145179	40.6707	-94.856	MEX	B	M	60.7	37.4	4.4	5.2	273	102	1367	288	254	1216	113	10	7031	-1538	6	6
AMNH_063	AMNH	145951	40.6707	-94.754	MEX	B	M	48.3	32.3	NA	5.4	271	103	1442	286	250	1066	112	6	6845	-1207	40	2
AMNH_064	AMNH	145180	40.6707	-94.856	MEX	B	M	53.7	34.9	3.5	5.1	273	102	1367	288	254	1216	113	10	7031	-1538	6	6
AMNH_065	AMNH	145181	40.6707	-94.856	MEX	B	F	54.2	37.9	4.1	5.5	273	102	1367	288	254	1216	113	10	7031	-1538	6	6
AMNH_066	AMNH	145629	40.6707	-94.856	MEX	B	M	53.2	42.1	NA	5.4	273	102	1367	288	254	1216	113	10	7031	-1538	6	6
AMNH_067	AMNH	145175	40.6707	-95.4102	MEX	B	F	47.9	31.5	NA	4.2	269	122	1483	285	247	748	115	4	8611	-977	234	39
AMNH_068	AMNH	145176	40.6707	-95.4102	MEX	B	M	41.2	32.1	3	4.9	269	122	1483	285	247	748	115	4	8611	-977	234	39
AMNH_069	AMNH	145956	40.6707	-95.2227	MEX	B	M	52.3	38.2	3.9	5.4	276	107	1390	290	256	870	114	11	5533	-930	45	0
AMNH_070	AMNH	145634	40.6707	-95.3327	MEX	B	M	50.7	29.8	3.2	4.9	276	116	1431	291	256	849	117	8	8507	-891	78	35
AMNH_071	AMNH	145955	40.6707	-95.2277	MEX	B	M	45.1	38.2	3.4	5.6	276	107	1385	291	256	866	113	11	3896	-930	53	0
AMNH_072	AMNH	145958	40.6707	-95.2227	MEX	B	F	48.3	37.5	NA	NA	276	107	1390	290	256	870	114	11	5533	-930	45	0
AMNH_073	AMNH	24717	40.6707	-105.787	MEX	C	F	47.1	37.3	NA	4.8	250	108	3035	284	209	864	93	68	4975	-938	21	12
AMNH_074	AMNH	24718	40.6707	-105.787	MEX	C	M	52.6	36.4	NA	5.1	250	108	3035	284	209	864	93	68	4975	-938	21	12
AMNH_075	AMNH	24720	40.6707	-105.787	MEX	C	F	52.8	36.8	NA	5.2	250	108	3035	284	209	864	93	68	4975	-938	21	12
AMNH_076	AMNH	131205	40.6707	-84.9508	USA	E	F	45.2	31.6	3.4	5	194	134	6143	268	111	1418	22	359	8578	-1017	36	58
AMNH_077	AMNH	131206	40.6707	-84.9508	USA	E	F	47.3	27.7	3.3	4.7	194	134	6143	268	111	1418	22	359	8578	-1017	36	58
AMNH_078	AMNH	91144	40.6707	-82.2584	USA	E	F	48.5	28.4	NA	5.6	196	137	5854	267	117	1318	34	284	9624	-881	45	60
AMNH_079	AMNH	182029	40.6707	-82.6411	USA	E	F	58.3	36.4	NA	5.5	225	94	4551	278	162	1227	55	198	5839	-838	14	0
AMNH_080	AMNH	100088	40.6707	-83.9658	USA	E	F	57.6	29.7	4.6	5.3	193	135	6066	267	112	1368	24	345	7528	-922	89	7
AMNH_081	AMNH	93125	40.6707	-83.8423	USA	E	M	58.5	31.1	4.2	5.5	194	135	6074	267	112	1336	24	336	9006	-905	68	51
AMNH_082	AMNH	24722	40.6707	-105.787	MEX	C	M	54.9	35.7	3.1	4.8	250	108	3035	284	209	864	93	68	4975	-938	21	12
AMNH_083	AMNH	24725	40.6707	-105.787	MEX	C	F	49.9	32.4	NA	4.8	250	108	3035	284	209	864	93	68	4975	-938	21	12
AMNH_084	AMNH	24726	40.6707	-105.787	MEX	C	M	56.2	35.1	NA	4.8	250	108	3035	284	209	864	93	68	4975	-938	21	12
AMNH_085	AMNH	24727	40.6707	-105.787	MEX	C	M	55.4	38.7	NA	5.3	250	108	3035	284	209	864	93	68	4975	-938	21	12
AMNH_086	AMNH	146770	40.6707	-99.1103	MEX	D	F	41.4	33.3	NA	4.2	237	138	4686	290	172	727	72	51	5946	-1003	195	9
AMNH_087	AMNH	172164	40.6707	-95.7594	MEX	B	F	52.9	38.7	4	4.8	261	84	2034	281	231	1681	82	129	7800	-1398	50	9
AMNH_088	AMNH	172157	40.6707	-95.0234	MEX	B	M	44.1	31.8	3.9	5.1	253	106	2138	278	223	2345	85	193	8141	-882	28	18
AMNH_089	AMNH	172159	40.6707	-95.0234	MEX	B	F	43.8	38	4.1	4.8	253	106	2138	278	223	2345	85	193	8141	-882	28	18
AMNH_091	AMNH	30524	40.6707	-89.6131	MEX	C	M	44.3	23.5	3.4	5.1	258	102	1930	276	230	958	70	95	4578	-576	11	1
AMNH_092	AMNH	1899/1164	40.6707	-82.3221	USA	E	F	40.7	24.8	3.1	4	204	128	5315	268	133	1327	41	275	7919	-873	30	24
AMNH_093	AMNH	1900/1165	40.6707	-82.3221	USA	E	F	52.1	30.4	NA	5.1	204	128	5315	268	133	1327	41	275	7919	-873	30	24
AMNH_094	AMNH	163976	40.6707	-82.5898	USA	E	F	43.6	26.1	3.4	4.8	212	129	4869	270	147	1363	48	242	8666	-988	15	55
AMNH_096	AMNH	243428	40.6707	-81.3507	USA	E	F	43.4	30.8	3	4.6	222	133	4125	270	165	1253	59	159	7058	-998	45	17
AMNH_097	AMNH	243429	40.6707	-81.3641	USA	E	F	50.2	26.7	3.3	5.5	223	132	4152	272	165	1223	58	160	6784	-1029	32	11
AMNH_098	AMNH	243430	40.6707	-81.3641	USA	E	M	58.1	31.7	3.9	6.1	223	132	4152	272	165	1223	58	160	6784	-1029	32	11
AMNH_099	AMNH	131201	40.6707	-84.135	USA	E	F	46.2	29.6	3.8	4.9	196	132	5899	268	118	1482	28	343	8733	-991	19	69
AMNH_100	AMNH	131204	40.6707	-84.2718	USA	E	M	57.7	26.5	4.1	5.8	194	131	5965	267	115	1500	26	352	6504	-812	56	8
CNMA_002	CNMA	34858	40.6707	-99.1852	MEX	C	M	55.2	35.2	3.9	5.6	156	172	2118	179	129	839	96	24	6365	-309	2309	14
CNMA_003	CNMA	43374	40.6707	-99.1881	MEX	C	F	44.5	37.9	NA	5.6	156	172	2133	179	126	847	95	24	6809	-330	2318	35
CNMA_004	CNMA	43372	40.6707	-99.1881	MEX	C	M	44.2	31.9	NA	5.6	156	172	2133	179	126	847	95	24	6809	-330	2318	35
CNMA_005	CNMA	4254	40.6707	-99.1855	MEX	C	F	37.1	30.6	4	5	158	172	2083	181	129	832	95	23	4767	-309	2291	4
CNMA_006	CNMA	33417	40.6707	-99.1855	MEX	C	F	41.6	32.9	3.8	4.8	158	172	2083	181	129	832	95	23	4767	-309	2291	4
CNMA_008	CNMA	23070	40.6707	-99.1841	MEX	C	M	44.9	38.9	NA	5.5	156	172	2118	179	126	839	96	24	6365	-309	2309	14
CNMA_009	CNMA	45114	40.6707	-99.1777	MEX	C	M	45	32.2	NA	4.9	158	172	2084	180	128	830	95	24	3538	-288	2294	12
CNMA_010	CNMA	45113	40.6707	-99.1947	MEX	C	F	49	38.9	NA	5.2	156	172	2119	179	127	847	95	30	6284	-309	2328	12
CNMA_011	CNMA	45116	40.6707	-99.1892	MEX	C	F	48.8	37.1	NA	5.7	158	172	2083	181	127	832	95	30	4767	-309	2291	4
CNMA_013	CNMA	4159	40.6707	-100.744	MEX	C	F	45.7	33.5	NA	4.5	169	151	2296	195	136	632	91	39	6893	-1034	2217	33
CNMA_014	CNMA	21866	40.6707	-100.066	MEX	C	M	49.1	36.3	NA	5.1	202	171	2647	230	163	471	80	28	4315	-986	1572	2
CNMA_015	CNMA	3522	40.6707	-99.6256	MEX	B	M	39.9	32.1	NA	5.2	202	171	2647	230	277	471	80	15	NA	NA	NA	NA
CNMA_016	CNMA	15637	40.6707	-99.8047	MEX	B	M	45.3	36.2	3.7	5	284	111	721	292	274	1116	110	18	8751	-776	15	38
CNMA_017	CNMA	45117	40.6707	-100.015	MEX	B	M	47	38.4	3.2	5.7	284	110	752	293	273	999	111	14	8625	-909	17	43
CNMA_020	CNMA	11687	40.6707	-99.93	MEX	B	M	44.5	41.2	3.6	5.6	236	144	1696	260	218	1038	111	17	8183	-842	1225	8
CNMA_022	CNMA	42921	40.6707	-105.083	MEX	C	M	41.9	34.2	NA	NA	265	129	1679	284	242	708	106	27	8223	-1078	71	29
CNMA_024	CNMA	3788	40.6707	-98.8235	MEX	C	M	52.3	43.9	4	6	143	177	1965	164	117	626	81	23	5585	-835	2468	3
CNMA_026	CNMA	9758	40.6707	-99.3308	MEX	C	M	46	37.1	NA	5.5	110	143	1377	126	93	1318	95	53	8176	-986	3199	80
CNMA_028	CNMA	26454	40.6707	-99.4403	MEX	B	F	43.2	36.2	3.7	4.8	209	141	1513	230	193	1077	103	41	8277	-844	1572	39
CNMA_031	CNMA	26460	40.6707	-99.4122	MEX	B	M	49.4	41.2	4.1	5.5	215	144	1564	237	197	1094	103	42	8596	-841	1457	49
CNMA_035	CNMA	1193	40.6707	-100.342	MEX	D	M	52.2	35.5	NA	5	219	122	4997	277	149	574	76	45	2776	-392	559	2
CNMA_037	CNMA	45141	40.6707	-97.8253	MEX	B	M	53	42.7	NA	5.4	206	170	1958	228	178	584	101	14	6026	-975	1595	9
CNMA_038	CNMA	2475	40.6707	-94.1944	MEX	B	F	45.9	32.7	3.6	5.1	267	120	1005	279	254	1608	106	12	7204	-822	59	12
CNMA_040	CNMA	3790	40.6707	-97.3564	MEX	C	M	45.4	33.6	NA	5.1	225	109	2961	254	188	2281	49	290	8525	-849	379	7
CNMA_043	CNMA	21991	40.6707	-99.3057	MEX	C	F	40.3	35.4	3.6	4.6	235	117	3760	273	182	1278	85	66	8127	-846	260	26
CNMA_044	CNMA	21989	40.6707	-99.3057	MEX	C	F	41.3	37	NA	4.9	235	117	3760	273	182	1278	85	66	8127	-846	260	26
CNMA_047	CNMA	21990	40.6707	-99.3057	MEX	C	M	49.6	43	4.4	5.5	235	117	3760	273	182	1278	85	66	8127	-846	260	26
CNMA_048	CNMA	45120	40.6707	-105.788	MEX	C	F	36.2	35.7	3.6	5	249	108	3019	284	209	865	93	67	7038	-938	16	11
CNMA_051	CNMA	26116	40.6707	-98.7222	MEX	D	F	42.2	33.2	3.4	4.4	206	134	4228	254	148	869	69	90	8582	-1037	829	39
CNMA_053	CNMA	45124	40.6707	-95.6612	MEX	B	M	47.9	39.6	NA	4.6	267	88	1784	285	241	1751	75	185	8010	-920	3	18
CNMA_054	CNMA	38011	40.6707	-97.1416	MEX	C	M	51	45.6	NA	5	239	115	2694	266	199	1441	47	218	7912	-814	171	12
CNMA_055	CNMA	45123	40.6707	-95.6612	MEX	B	M	45.6	34.5	NA	4.7	267	88	1784	285	241	1751	75	185	8010	-920	3	18
CNMA_056	CNMA	45125	40.6707	-95.6612	MEX	B	F	51.2	38.1	NA	4.6	267	88	1784	285	241	1751	75	185	8010	-920	3	18
CNMA_057	CNMA	45126	40.6707	-95.6612	MEX	B	F	49.6	34.1	NA	5	267	88	1784	285	241	1751	75	185	8010	-920	3	18
CNMA_058	CNMA	45127	40.6707	-95.6612	MEX	B	M	50.7	41.8	NA	5	267	88	1784	285	241	1751	75	185	8010	-920	3	18
MALH_001	MALH	03466	40.6707	-99.4364	MEX	C	M	54.6	34.1	3.6	5.2	206	149	2855	235	166	894	87	50	8124	-916	1439	32
MALH_002	MALH	03465	40.6707	-99.1902	MEX	C	F	56	36.4	4.1	5.1	156	172	2118	179	126	839	96	24	6365	-309	2309	14
MALH_004	MALH	03472	40.6707	-99.444	MEX	B	F	45.1	37.6	3.6	4.3	241	169	1883	265	215	903	105	24	8461	-876	1049	27
MALH_006	MALH	03468	40.6707	-99.1902	MEX	C	F	41.9	35.8	NA	4.9	156	172	2118	179	126	839	96	24	6365	-309	2309	14
MALH_008	MALH	1397	40.6707	-99.4701	MEX	C	F	42.8	34.2	3.3	4.5	227	145	3356	263	180	964	91	56	7533	-882	880	40
MALH_009	MALH	03475	40.6707	-95.9557	MEX	B	M	44.8	38.5	NA	5	261	86	2172	282	228	1542	93	86	8458	-1075	17	66
MALH_010	MALH	03473	40.6707	-96.6281	MEX	C	M	50.2	37.4	NA	5.5	247	117	2261	271	214	980	95	54	8470	-857	256	40
MALH_011	MALH	0045	40.6707	-94.7507	MEX	B	M	51.8	36.5	4	5.2	244	91	1948	264	216	2490	65	362	8867	-838	224	38
MALH_013	MALH	03476	40.6707	-96.6281	MEX	C	F	45.9	33.1	3.1	4.6	247	117	2261	271	214	980	95	54	8470	-857	256	40
MALH_014	MALH	925	40.6707	-100.173	MEX	B	F	46.9	38.2	4	5.3	152	101	737	162	149	1756	99	51	8465	-797	2655	59
MALH_015	MALH	931	40.6707	-99.6856	MEX	B	M	46.2	39.9	NA	5.4	182	110	918	195	171	1498	102	37	8269	-855	2250	73
MVZ_005	MVZ	100067	40.6707	-101.442	MEX	C	F	44.1	31.7	4.3	5	233	160	1639	256	215	1086	113	27	8400	-858	1192	22
MVZ_006	MVZ	100074	40.6707	-101.457	MEX	C	M	46.6	34.3	3.9	5.4	208	161	1683	231	181	1143	111	32	8394	-844	1482	33
MVZ_007	MVZ	91164	40.6707	-100.308	MEX	D	F	38.3	31.1	4.6	4.5	151	136	2607	181	115	593	79	45	7641	-824	1854	44
MVZ_008	MVZ	85261	40.6707	-109.259	MEX	E	M	46.1	32.6	3.3	NA	253	175	5008	313	188	525	120	53	6405	-1008	79	15
MVZ_009	MVZ	85262	40.6707	-109.259	MEX	E	F	34.5	33.6	3.6	4.7	253	175	5008	313	188	525	120	53	6405	-1008	79	15
MVZ_010	MVZ	121179	40.6707	-95.3072	MEX	B	F	48.5	32.8	NA	4.7	243	92	2184	268	213	2778	65	420	7933	-826	296	12
MVZ_011	MVZ	85264	40.6707	-109.259	MEX	E	M	45	38.2	NA	4.6	253	175	5008	313	188	525	120	53	6405	-1008	79	15
MVZ_012	MVZ	85263	40.6707	-109.259	MEX	E	F	46.4	40.3	NA	4.5	253	175	5008	313	188	525	120	53	6405	-1008	79	15
MVZ_014	MVZ	81582	40.6707	-94.144	USA	E	F	48.1	29.2	NA	5.4	197	116	6336	274	111	1425	17	336	5914	-770	13	30
MVZ_015	MVZ	33460	40.6707	-122.245	USA	G	F	40.6	28.2	NA	5.1	141	103	3342	183	94	690	87	387	8236	-706	205	24
MVZ_016	MVZ	47148	40.6707	-122.215	USA	G	M	NA	29.9	NA	5.2	140	111	3764	189	94	721	86	380	7673	-709	337	18
MVZ_018	MVZ	51974	40.6707	-122.255	USA	G	M	NA	31	NA	6.1	140	104	3356	182	101	705	88	348	6933	-806	223	19
MVZ_019	MVZ	97345	40.6707	-122.266	USA	G	M	NA	34.4	NA	5.9	141	95	3016	177	103	644	89	327	6543	-806	119	7
MVZ_020	MVZ	98145	40.6707	-122.274	USA	G	F	52.2	28.4	NA	4.9	142	93	2964	177	102	625	88	344	6021	-806	100	3
MVZ_022	MVZ	126168	40.6707	-122.232	USA	G	F	46.4	28.7	NA	5.3	140	106	3437	184	96	695	88	368	6421	-663	248	11
MVZ_023	MVZ	220246	40.6707	122.245	USA	G	F	47.5	26.4	3.5	NA	141	103	3342	183	98	690	87	363	8236	-706	205	24
MVZ_025	MVZ	138994	40.6707	-122.163	USA	H	F	59.6	26.3	NA	5.1	159	154	6266	238	81	456	83	246	6861	-1227	25	24
MVZ_026	MVZ	104560	40.6707	-120.534	USA	G	M	59.5	30.9	NA	5.7	165	158	6444	246	83	226	82	116	7739	-866	37	18
MVZ_029	MVZ	77023	40.6707	-117.182	USA	F	F	53.6	29.1	3.3	5	178	163	5383	252	115	313	84	166	2999	-821	425	7
MVZ_031	MVZ	21990	40.6707	-95.235	USA	G	M	48.6	27.5	3.3	5	128	117	9674	248	-1	961	45	93	6226	-888	274	0
MVZ_032	MVZ	106578	40.6707	-97.4503	USA	H	F	51.7	26.3	NA	5.1	NA	NA	NA	NA	NA	NA	NA	NA	6671	-856	491	7
MVZ_033	MVZ	114854	40.6707	-96.1637	USA	H	F	48.6	27.8	NA	4.5	107	134	10407	237	-33	819	48	70	7319	-922	329	1
MVZ_034	MVZ	114842	40.6707	-96.6701	USA	H	F	48.2	26.7	NA	4.7	107	126	10651	241	-36	749	52	59	5950	-809	347	1
MVZ_035	MVZ	129731	40.6707	-80.2506	USA	G	M	47.6	31.1	NA	5.3	147	127	7776	245	44	1134	10	272	6935	-726	245	8
MVZ_036	MVZ	80746	40.6707	-98.4843	USA	G	M	56.5	25.4	NA	NA	150	136	9117	266	30	722	46	75	5485	-1210	466	2
MVZ_037	MVZ	81408	40.6707	-83.8367	USA	H	M	43.5	18.1	3.3	5.3	111	109	8962	222	-10	1039	19	212	8279	-865	310	30
MVZ_039	MVZ	31840	40.6707	-77.1714	USA	G	M	43.9	28.6	NA	5.3	127	117	8525	235	14	1033	11	224	7901	-634	99	10
MVZ_040	MVZ	14704	40.6707	-76.4641	USA	G	M	50.5	29.8	NA	4.4	148	100	7765	246	46	1121	16	261	8120	-799	15	30
MVZ_041	MVZ	14705	40.6707	-76.4641	USA	G	F	46.9	27.3	3.2	4.8	148	100	7765	246	46	1121	16	261	8120	-799	15	30
MVZ_043	MVZ	130275	40.6707	-89.1333	SLV	A	F	41.2	32.2	NA	4	132	92	1069	142	120	2359	72	131	8679	-844	2504	74
MVZ_046	MVZ	98152	40.6707	-88.2167	SLV	A	M	53.1	38.3	NA	5.1	193	113	892	203	184	2222	91	17	8621	-776	1258	68
MVZ_048	MVZ	98155	40.6707	-88.0667	SLV	A	M	49.4	33.6	NA	5.3	258	116	748	268	256	1831	99	346	8804	-897	253	0
MVZ_050	MVZ	130298	40.6707	-88.0667	SLV	A	F	41.7	33.7	4.4	5.4	258	116	748	268	256	1831	99	346	8804	-897	253	0
MVZ_051	MVZ	130299	40.6707	-88.0667	SLV	A	F	46.7	40.2	3.4	5.5	258	116	748	268	256	1831	99	346	8804	-897	253	0
MVZ_052	MVZ	130302	40.6707	-88.0667	SLV	A	M	45.2	37.4	3.2	5.3	258	116	748	268	256	1831	99	346	8804	-897	253	0
MVZ_053	MVZ	130310	40.6707	-88.3667	SLV	A	M	44.1	33.4	NA	4.5	261	114	782	272	254	1764	98	337	9155	-833	18	65
MVZ_054	MVZ	130311	40.6707	-88.3667	SLV	A	F	47.5	36.4	NA	4.6	261	114	782	272	254	1764	98	337	9155	-833	18	65
USNM_005	USNM	76717	40.6707	-91.7528	GUA	B	F	40.4	34	NA	4.3	228	135	1108	240	213	1611	89	113	7874	-871	840	32
USNM_006	USNM	275678	40.6707	-91.0565	GUA	A	M	50.4	NA	NA	4.9	275	107	760	285	266	1599	89	8	9441	-937	9	24
USNM_007	USNM	19463	40.6707	-88.0286	HON	B	F	45.1	37.6	NA	5	264	103	1472	278	242	1382	38	293	4084	-670	98	0
USNM_008	USNM	148748	40.6707	-88.0112	HON	B	M	40.3	NA	NA	4.6	267	104	1421	281	246	1489	37	328	7232	-782	46	3
USNM_010	USNM	181261	40.6707	-90.1065	MEX	B	M	48.4	36.4	NA	4.2	253	121	2172	276	224	1204	66	120	9616	-819	202	81
USNM_011	USNM	181262	40.6707	-90.1065	MEX	B	M	49.2	28.3	NA	4.5	253	121	2172	276	224	1204	66	120	9616	-819	202	81
USNM_012	USNM	76202	40.6707	-93.3643	MEX	B	F	36.6	32.6	NA	4.7	226	125	1601	243	209	962	91	35	8212	-867	989	27
USNM_013	USNM	76203	40.6707	-93.4122	MEX	B	M	46.1	33.5	NA	5.1	228	120	1707	245	204	914	83	57	7551	-794	922	34
USNM_014	USNM	76209	40.6707	-92.6271	MEX	B	F	36.6	32	NA	4.4	151	130	1198	162	133	1208	72	75	6884	-813	2148	3
USNM_015	USNM	76211	40.6707	-92.3142	MEX	B	M	58.7	39.1	NA	5.3	199	118	1378	211	173	3519	55	521	8866	-721	1399	26
USNM_016	USNM	76213	40.6707	-92.3142	MEX	B	F	48.2	35.1	NA	4.6	199	118	1378	211	173	3519	55	521	8866	-721	1399	26
USNM_017	USNM	76214	40.6707	-92.3142	MEX	B	M	51.2	35.3	NA	5.1	199	118	1378	211	173	3519	55	521	8866	-721	1399	26
USNM_018	USNM	76716	40.6707	-92.088	MEX	B	M	38.1	27.7	NA	4.4	186	139	1209	199	169	1006	86	34	7117	-922	1589	14
USNM_019	USNM	78001	40.6707	-92.3932	MEX	B	M	51.3	38.4	NA	5.5	274	131	768	285	264	2496	85	125	8201	-768	56	24
USNM_020	USNM	133187	40.6707	-92.5492	MEX	B	M	48.1	34.6	NA	4.9	236	149	1363	253	211	1374	97	36	6951	-858	794	16
USNM_022	USNM	32635	40.6707	-104.32	MEX	C	F	43.9	33.8	NA	4.8	265	111	1609	283	244	987	113	32	5547	-917	44	54
USNM_023	USNM	32636	40.6707	-104.32	MEX	C	M	57.7	40.2	NA	5.2	265	111	1609	283	244	987	113	32	5547	-917	44	54
USNM_024	USNM	32637	40.6707	-104.32	MEX	C	M	53.2	40	NA	5.6	265	111	1609	283	244	987	113	32	5547	-917	44	54
USNM_026	USNM	32639	40.6707	-104.32	MEX	C	F	45.5	36.6	NA	4.3	265	111	1609	283	244	987	113	32	5547	-917	44	54
USNM_028	USNM	32645	40.6707	-104.32	MEX	C	M	44.2	34.9	NA	5.1	265	111	1609	283	244	987	113	32	5547	-917	44	54
USNM_029	USNM	32646	40.6707	-104.32	MEX	C	F	36.8	32.5	NA	4.4	265	111	1609	283	244	987	113	32	5547	-917	44	54
USNM_030	USNM	33226	40.6707	-104.32	MEX	C	M	44.3	37.1	NA	5	265	111	1609	283	244	987	113	32	5547	-917	44	54
USNM_031	USNM	33264	40.6707	-103.96	MEX	B	F	41.9	37.8	NA	4.8	264	127	1750	284	241	762	102	29	7255	-869	46	8
USNM_032	USNM	33265	40.6707	-103.96	MEX	B	M	48.1	45.5	NA	5.2	264	127	1750	284	241	762	102	29	7255	-869	46	8
USNM_033	USNM	33266	40.6707	-103.96	MEX	B	F	45.6	40.8	NA	5.2	264	127	1750	284	241	762	102	29	7255	-869	46	8
USNM_035	USNM	33268	40.6707	-103.96	MEX	B	M	50.5	41.3	NA	5	264	127	1750	284	241	762	102	29	7255	-869	46	8
USNM_036	USNM	96819	40.6707	-106.739	MEX	D	M	50.5	38	NA	5.1	239	154	3359	276	193	1063	109	110	8448	-766	633	31
USNM_037	USNM	70617	40.6707	-99.8879	MEX	B	M	57.8	32.5	NA	5.2	277	115	704	285	261	1140	111	21	6752	-806	271	16
USNM_038	USNM	70618	40.6707	-99.8879	MEX	B	F	47.3	37.1	NA	5.2	277	115	704	285	261	1140	111	21	6752	-806	271	16
USNM_039	USNM	70619	40.6707	-99.8879	MEX	B	M	42.4	33.9	NA	4.9	277	115	704	285	261	1140	111	21	6752	-806	271	16
USNM_040	USNM	70620	40.6707	-99.8879	MEX	B	F	45.3	39.6	NA	4.2	277	115	704	285	261	1140	111	21	6752	-806	271	16
USNM_041	USNM	126715	40.6707	-101.991	MEX	B	F	38.2	34.2	NA	4.3	273	132	1167	285	257	950	107	31	7837	-875	127	20
USNM_042	USNM	26418	40.6707	-98.7407	MEX	C	M	36.3	31.3	NA	4.5	140	137	1672	161	107	615	71	65	1968	-887	2460	2
USNM_043	USNM	26419	40.6707	-98.7407	MEX	C	F	35.7	35.1	NA	4.7	140	137	1672	161	107	615	71	65	1968	-887	2460	2
USNM_044	USNM	26420	40.6707	-98.6736	MEX	C	M	39.1	32.5	NA	4	121	128	1561	140	97	870	68	73	4630	-944	2746	1
USNM_045	USNM	81726	40.6707	-99.2142	MEX	C	M	45	33.5	NA	4.6	183	173	2479	209	149	386	70	31	3899	-970	1705	1
USNM_046	USNM	33517	40.6707	-103.447	MEX	C	F	42.1	35	NA	4.8	180	149	1918	201	164	776	97	47	8249	-820	1700	28
USNM_047	USNM	34338	40.6707	-103.365	MEX	C	F	53.1	38.5	NA	4.8	196	163	2431	224	161	952	111	39	3350	-491	1533	1
USNM_048	USNM	34339	40.6707	-103.365	MEX	C	M	44.4	34.6	NA	5.3	196	163	2431	224	161	952	111	39	3350	-491	1533	1
USNM_050	USNM	88142	40.6707	-104.85	MEX	C	F	38.9	34.6	NA	4.5	185	147	1944	205	163	1286	110	57	7809	-791	1480	36
USNM_053	USNM	51506	40.6707	-98.7602	MEX	C	M	48.1	37.1	NA	5.2	142	162	1610	160	119	947	93	26	8447	-845	2492	15
USNM_054	USNM	20443	40.6707	-102.474	MEX	C	F	41.3	33.6	NA	4.7	199	156	2396	225	164	787	109	31	8005	-864	1534	16
USNM_055	USNM	35526	40.6707	-100.891	MEX	C	F	48.2	35.6	NA	4.9	175	158	2204	201	147	748	102	30	7302	-882	1904	13
USNM_056	USNM	35527	40.6707	-100.891	MEX	C	F	45.1	32.9	NA	4.7	175	158	2204	201	147	748	102	30	7302	-882	1904	13
USNM_057	USNM	35528	40.6707	-100.891	MEX	C	M	51.7	40.2	NA	5.1	175	158	2204	201	147	748	102	30	7302	-882	1904	13
USNM_059	USNM	126167	40.6707	-101.607	MEX	C	M	45.9	32.4	NA	5.5	201	155	1463	221	172	1184	110	33	8264	-906	1552	48
USNM_060	USNM	51125	40.6707	-99.0589	MEX	B	F	43.5	31	NA	4	233	166	1776	256	209	926	100	35	7381	-781	1217	5
USNM_061	USNM	25558	40.6707	-100.405	MEX	D	F	40.8	35.7	NA	4.3	199	125	4936	257	129	402	85	35	5737	-625	889	3
USNM_064	USNM	25735	40.6707	-100.405	MEX	D	M	42.9	33.8	NA	4.7	199	125	4936	257	129	402	85	35	5737	-625	889	3
USNM_065	USNM	88143	40.6707	-104.898	MEX	C	F	35.6	30.5	NA	4	213	143	2284	238	181	1289	119	59	3148	-666	942	2
USNM_066	USNM	91169	40.6707	-105.363	MEX	C	F	42.1	34.4	NA	4.5	248	118	2641	277	212	1337	121	68	7936	-857	30	10
USNM_068	USNM	512183	40.6707	-105.221	MEX	C	F	39.8	33.1	3.5	4.3	257	125	2415	284	225	1166	118	37	8039	-814	33	10
USNM_070	USNM	523002	40.6707	-105.227	MEX	C	M	40.9	35.7	4.2	4.6	257	120	2635	287	222	1401	124	43	9418	-1418	15	13
USNM_071	USNM	523003	40.6707	-105.227	MEX	C	M	41.1	34.3	4.2	4.8	257	120	2635	287	222	1401	124	43	9418	-1418	15	13
USNM_072	USNM	553883	40.6707	-105.191	MEX	C	M	54.4	40.6	4.2	6	255	117	2757	286	219	1555	125	42	8679	-915	51	67
USNM_073	USNM	65954	40.6707	-96.1318	MEX	B	M	45.4	37.4	3.2	5.7	252	98	2393	278	219	2375	92	133	5357	-782	31	6
USNM_074	USNM	65955	40.6707	-96.1318	MEX	B	F	47.4	NA	3	4.9	252	98	2393	278	219	2375	92	133	5357	-782	31	6
USNM_075	USNM	69798	40.6707	-96.9627	MEX	B	F	44.9	40	4	5.1	251	137	2370	280	214	500	103	12	6863	-882	611	10
USNM_076	USNM	73490	40.6707	-95.2409	MEX	B	M	50.6	41.8	3.6	6.3	276	108	1359	290	256	860	114	10	5139	-920	42	2
USNM_077	USNM	73491	40.6707	-95.0964	MEX	B	F	51.5	36.8	4.1	4.3	244	107	1715	265	219	1594	89	109	7785	-786	260	36
USNM_078	USNM	73492	40.6707	-95.2409	MEX	B	M	41.9	35.8	3.9	4.7	276	108	1359	290	256	860	114	10	5139	-920	42	2
USNM_080	USNM	55579	40.6707	-98.4306	MEX	C	F	43.1	33.8	3.5	4.8	155	161	1867	175	127	698	86	22	4036	-849	2248	2
USNM_081	USNM	92978	40.6707	-97.8519	MEX	C	M	54.3	39.8	3.9	6.1	234	112	3257	267	187	1616	65	147	8250	-800	316	20
USNM_083	USNM	96225	40.6707	-107.712	MEX	E	F	41.9	31.8	3.1	4.6	169	180	4280	221	113	968	99	128	7395	-914	1577	24
USNM_084	USNM	96820	40.6707	-107.387	MEX	D	M	50.4	39.7	3.7	5.6	252	155	3832	296	203	661	116	63	4089	-694	112	2
USNM_085	USNM	96821	40.6707	-106.433	MEX	D	F	47.4	39.1	3.2	4.8	247	97	3175	283	207	785	121	40	7005	-957	15	8
USNM_086	USNM	98077	40.6707	-105.787	MEX	C	F	46.7	38.2	4.1	5.1	250	108	3035	284	209	864	93	68	4975	-938	21	12
USNM_087	USNM	33705	40.6707	-110.947	MEX	E	F	55.1	44.1	4.7	6.2	242	157	5870	314	167	284	114	50	2768	-771	211	1
USNM_088	USNM	100509	40.6707	-92.9439	MEX	B	F	42.5	32.4	3.7	4.4	259	115	1983	278	230	3614	44	756	6071	-682	41	9
USNM_089	USNM	100511	40.6707	-92.9439	MEX	B	M	49.1	39.2	3.5	5.1	259	115	1983	278	230	3614	44	756	6071	-682	41	9
USNM_093	USNM	92963	40.6707	-97.9351	MEX	C	M	49.6	42.9	4	4.9	239	86	3366	275	191	1002	91	77	6219	-962	16	11
USNM_094	USNM	92964	40.6707	-97.9351	MEX	C	F	44.8	36.1	4.7	5	239	86	3366	275	191	1002	91	77	6219	-962	16	11
USNM_095	USNM	94092	40.6707	-97.9351	MEX	C	M	46.2	35.6	4	5.9	239	86	3366	275	191	1002	91	77	6219	-962	16	11
USNM_096	USNM	7846	40.6707	-97.0913	MEX	B	M	48.4	34.5	NA	5.1	195	115	1943	216	168	2061	82	127	4785	-633	1218	1
USNM_097	USNM	54989	40.6707	-97.0073	MEX	C	M	55.1	41.1	4.5	5.8	188	103	2089	210	157	1875	69	168	8042	-702	1295	27
USNM_099	USNM	65956	40.6707	-95.1171	MEX	B	M	48.7	38.9	3.3	5.1	236	92	2180	261	206	2306	72	255	7155	-848	396	34
USNM_100	USNM	78123	40.6707	-94.5501	MEX	B	M	51.3	34.8	3.5	4.8	260	94	2108	283	230	2410	68	320	4627	-733	21	6
USNM_101	USNM	90988	40.6707	-104.102	MEX	C	M	45.8	37.8	3.4	4.8	215	158	3300	251	168	493	100	51	4621	-930	1221	1
USNM_103	USNM	332425	40.6707	-86.3659	NIC	A	M	46.9	39.5	3.6	4.4	275	104	935	288	264	1116	104	321	NA	NA	NA	NA
USNM_104	USNM	332426	40.6707	-86.3659	NIC	A	M	42.6	37.9	3.7	4.9	275	104	935	288	264	1116	104	321	NA	NA	NA	NA
USNM_106	USNM	332429	12.276	-86.3659	NIC	A	M	46.1	39	4.5	4.6	275	104	935	288	264	1116	104	321	NA	NA	NA	NA
USNM_107	USNM	332430	12.276	-86.3659	NIC	A	F	39.9	36.6	3.8	4.4	275	104	935	288	264	1116	104	321	NA	NA	NA	NA
USNM_108	USNM	332431	12.276	-86.3659	NIC	A	M	44.6	40.4	3.4	4.9	275	104	935	288	264	1116	104	321	NA	NA	NA	NA
USNM_109	USNM	332432	12.276	-86.3659	NIC	A	F	43.2	37.5	NA	5.1	275	104	935	288	264	1116	104	321	NA	NA	NA	NA
USNM_110	USNM	332433	12.276	-86.3659	NIC	A	M	44.1	39.9	NA	5	275	104	935	288	264	1116	104	321	NA	NA	NA	NA
USNM_111	USNM	332434	12.276	-86.3659	NIC	A	F	43.5	42.4	NA	NA	275	104	935	288	264	1116	104	321	NA	NA	NA	NA
USNM_112	USNM	334580	12.276	-86.3659	NIC	A	M	51.5	40.2	NA	5.1	275	104	935	288	264	1116	104	321	NA	NA	NA	NA
USNM_113	USNM	334581	12.276	-86.3659	NIC	A	F	47.2	38.6	NA	4	275	104	935	288	264	1116	104	321	NA	NA	NA	NA
USNM_114	USNM	334582	12.4172	-86.6451	NIC	A	F	47	39.3	NA	4.4	268	109	871	280	258	1390	107	68	NA	NA	NA	NA
USNM_116	USNM	337522	12.5503	-87.1661	NIC	A	F	44.4	36.1	3.5	4.1	274	114	933	286	262	1626	97	91	NA	NA	NA	NA
USNM_118	USNM	337525	12.5503	-87.1661	NIC	A	F	46.9	39.1	3.9	4.1	274	114	933	286	262	1626	97	91	NA	NA	NA	NA
USNM_119	USNM	337526	12.5503	-87.1661	NIC	A	F	46.7	27.6	3.8	4.7	274	114	933	286	262	1626	97	91	NA	NA	NA	NA
USNM_120	USNM	337531	13.0188	-85.8355	NIC	A	F	41.8	34.6	3.8	3.9	202	101	871	212	190	1808	62	277	9160	-692	1029	31
USNM_121	USNM	337653	12.4172	-86.6451	NIC	A	F	47.1	35.2	3.4	4.4	268	109	871	280	258	1390	107	68	NA	NA	NA	NA
USNM_122	USNM	337654	12.4172	-86.6451	NIC	A	M	48.2	40.1	NA	5	268	109	871	280	258	1390	107	68	NA	NA	NA	NA
USNM_123	USNM	337841	11.3247	-85.7074	NIC	A	F	46.2	33.9	NA	4.2	265	102	792	277	256	1646	80	492	NA	NA	NA	NA
USNM_124	USNM	337842	11.3247	-85.7074	NIC	A	M	50.1	40.7	3.1	4.7	265	102	792	277	256	1646	80	492	NA	NA	NA	NA
USNM_125	USNM	337843	11.3247	-85.7074	NIC	A	M	46.3	34.6	NA	4.2	265	102	792	277	256	1646	80	492	NA	NA	NA	NA
USNM_126	USNM	337846	11.3247	-85.7074	NIC	A	F	44.7	30.8	3.7	4.1	265	102	792	277	256	1646	80	492	NA	NA	NA	NA
USNM_127	USNM	337847	11.3247	-85.7074	NIC	A	F	40.4	35.4	3.7	3.8	265	102	792	277	256	1646	80	492	NA	NA	NA	NA
USNM_129	USNM	11422	20.9747	-89.6131	MEX	C	F	44.6	32.2	NA	4.7	258	102	1930	276	230	958	70	95	4578	-576	11	1
USNM_131	USNM	11425	20.9747	-89.6131	MEX	C	F	44.1	35.6	NA	4.2	258	102	1930	276	230	958	70	95	4578	-576	11	1
USNM_134	USNM	108495	20.5049	-86.926	MEX	C	F	31.9	26.2	3.1	3.9	261	91	1607	278	237	1396	52	240	7248	-987	7	1
USNM_135	USNM	108496	20.5049	-86.926	MEX	C	F	35.2	28	3.2	4	261	91	1607	278	237	1396	52	240	7248	-987	7	1
USNM_136	USNM	108497	20.5049	-86.926	MEX	C	F	38.2	29.3	3.4	3.9	261	91	1607	278	237	1396	52	240	7248	-987	7	1
USNM_137	USNM	108499	20.5049	-86.926	MEX	C	M	42.4	34.8	3.9	4.6	261	91	1607	278	237	1396	52	240	7248	-987	7	1
USNM_138	USNM	172068	20.9335	-89.0166	MEX	C	M	37.1	34.2	3.6	4.9	261	127	2060	281	232	1059	71	96	8249	-837	14	19
USNM_139	USNM	100531	19.8432	-90.5025	MEX	C	M	38.8	33.4	3.3	4.8	264	98	2084	285	234	1069	81	75	5866	-812	22	0
USNM_141	USNM	18342	29.3631	-100.929	USA	E	M	43.5	33.4	4	4.4	212	129	6888	295	119	432	51	49	3638	-963	297	1
USNM_142	USNM	24359	29.2425	-100.791	USA	E	M	42.9	35.2	3.2	5.1	213	129	6891	296	120	486	51	55	6435	-1065	266	12
USNM_144	USNM	14909	25.9	-97.4725	USA	D	F	40.1	36.9	NA	4.8	231	98	4803	288	165	686	55	107	4895	-832	13	5
USNM_145	USNM	31909	27.8368	-97.4925	USA	E	M	44.5	35.9	3.1	4.9	220	105	5676	287	142	798	45	133	7509	-900	5	0
USNM_146	USNM	31415	27.7917	-97.3955	USA	E	M	49.7	33.8	3.6	5.2	221	97	5585	287	144	793	45	134	1936	-808	12	0
USNM_147	USNM	32691	25.9	-97.4725	USA	D	F	45.8	38.7	NA	4.3	231	98	4803	288	165	686	55	107	4895	-832	13	5
USNM_148	USNM	33131	25.9	-97.4725	USA	D	F	42.7	34.4	3.2	4.3	231	98	4803	288	165	686	55	107	4895	-832	13	5
USNM_149	USNM	33132	25.9	-97.4725	USA	D	M	42.8	31.4	3.4	4.4	231	98	4803	288	165	686	55	107	4895	-832	13	5
USNM_150	USNM	63130	29.3014	-100.418	USA	E	F	45.4	36.9	3.5	5	202	136	6793	283	109	555	43	73	5314	-1144	347	6
USNM_151	USNM	63131	29.3014	-100.418	USA	E	M	55.7	40.4	3.7	6.1	202	136	6793	283	109	555	43	73	5314	-1144	347	6
USNM_152	USNM	143137	29.3014	-100.418	USA	E	M	55.3	37.5	3.8	5.7	202	136	6793	283	109	555	43	73	5314	-1144	347	6
USNM_153	USNM	61841	27.3549	-81.0438	USA	E	M	43.7	29.6	3.4	5	225	124	4042	272	169	1194	56	153	7834	-1027	18	36
USNM_154	USNM	61843	27.3247	-81.0348	USA	E	M	50.3	33.5	3.3	5.7	225	123	4051	273	169	1188	55	152	8574	-1008	14	66
USNM_155	USNM	61844	27.3247	-81.0348	USA	E	M	45.2	31.1	3.2	5	225	123	4051	273	169	1188	55	152	8574	-1008	14	66
USNM_156	USNM	63997	27.4337	-81.0345	USA	E	M	45.9	38.1	3.8	6	225	123	4063	272	169	1206	55	156	8161	-1041	19	20
USNM_157	USNM	63998	27.3885	-81.0379	USA	E	F	46.8	32.3	NA	5.4	225	123	4087	273	169	1198	56	155	7759	-1046	17	9
USNM_158	USNM	71753	24.5679	-81.7614	USA	D	F	44.7	28.7	3.8	5.1	252	60	2904	286	212	1004	46	148	3475	-1408	1	0
USNM_159	USNM	79113	28.7935	-81.0278	USA	E	M	48.7	33.8	NA	5.2	217	107	4574	271	155	1294	45	196	8991	-998	8	61
USNM_161	USNM	79116	28.7935	-81.0278	USA	E	M	52.1	33.7	NA	5.4	217	107	4574	271	155	1294	45	196	8991	-998	8	61
USNM_163	USNM	111239	27.9662	-81.452	USA	E	M	44.1	30.3	3.4	5.6	224	127	4307	275	165	1220	53	184	7194	-1006	24	28
USNM_164	USNM	111262	27.9662	-81.452	USA	E	F	39.9	34.8	4	4.9	224	127	4307	275	165	1220	53	184	7194	-1006	24	28
USNM_165	USNM	263699	29.1553	-81.8614	USA	E	F	46.8	30	3.7	5.6	209	127	5000	269	142	1288	40	232	7912	-1010	24	57
USNM_167	USNM	116956	30.9073	-86.5165	USA	E	M	48.3	29.7	3.8	5.5	187	128	6345	264	102	1555	20	385	8422	-991	60	57
USNM_171	USNM	111274	27.9662	-81.452	USA	E	M	43.7	33.9	3.5	5.5	224	127	4307	275	165	1220	53	184	7194	-1006	24	28
USNM_172	USNM	231584	25.4939	-80.4828	USA	D	M	51.6	30.9	NA	5.5	236	98	3241	274	193	1548	60	134	6846	-821	8	8
USNM_176	USNM	33060	31.7244	-81.4747	USA	F	F	44.6	28.5	3.5	4.3	192	116	6238	268	110	1260	34	261	8786	-982	10	72
USNM_177	USNM	223934	30.9275	-82.2959	USA	E	M	53.1	32.9	NA	5.7	195	136	5924	267	115	1314	33	289	8679	-867	50	82
USNM_179	USNM	34290	30.2611	-91.991	USA	E	F	44.6	30.2	3.9	5	196	113	6204	271	113	1492	14	386	8540	-862	17	64
USNM_181	USNM	139776	29.7022	-92.2117	USA	E	M	46.9	28.8	3.6	5.2	198	101	6135	270	113	1541	25	347	8753	-1132	1	38
USNM_182	USNM	247171	29.7065	-91.1955	USA	E	M	42.1	33.4	3.5	5.2	201	108	5888	272	121	1624	24	381	7592	-901	3	10
USNM_186	USNM	33126	30.3116	-89.339	USA	E	M	49.7	32.3	NA	5.1	194	107	6094	268	113	1572	17	411	7510	-1123	10	9
USNM_187	USNM	33849	30.3116	-89.339	USA	E	F	41.3	31.1	3.7	4.5	194	107	6094	268	113	1572	17	411	7510	-1123	10	9
USNM_189	USNM	186544	32.4337	-80.6741	USA	F	F	42.8	28.1	3.8	4.5	186	111	6506	266	99	1274	34	259	4553	-908	8	13
USNM_190	USNM	32431	28.7035	-95.9624	USA	E	F	45.4	28.7	4.2	4.5	212	95	5902	283	131	1145	32	228	7507	-1146	5	28
USNM_192	USNM	32433	28.9042	-96.1831	USA	E	F	44.2	30.8	3.8	4.6	208	106	6009	280	126	1115	28	221	7988	-1081	14	33
USNM_193	USNM	203535	34.8518	-87.5278	USA	F	F	43.4	29.3	NA	4.9	154	133	7739	250	51	1396	18	391	8183	-936	181	44
USNM_194	USNM	207189	33.9951	-87.099	USA	F	M	48.2	28.4	NA	5.2	156	136	7523	250	56	1462	18	415	7866	-996	192	13
USNM_196	USNM	197061	34.4968	-91.5613	USA	F	M	51.9	32.1	4.2	5.8	167	117	8031	267	59	1265	20	327	7057	-944	60	8
USNM_205	USNM	347670	38.3622	-87.7109	USA	G	M	49.2	NA	3.6	4.9	129	117	9157	243	6	1112	18	233	8761	-866	129	48
USNM_206	USNM	347672	40.2906	-85.4233	USA	H	M	57.9	31.8	NA	5.7	100	111	9578	218	-30	957	20	178	8639	-838	277	1
USNM_207	USNM	347673	40.4298	-86.9533	USA	H	F	44.4	27.9	NA	4.6	102	115	9687	220	-30	946	24	162	8384	-841	204	21
USNM_208	USNM	506572	40.7461	-86.171	USA	H	M	60.3	25.4	3.2	5.3	99	115	9654	218	-33	949	22	170	8268	-844	196	11
USNM_209	USNM	506573	40.8402	-85.7313	USA	H	M	58.1	25.2	2.5	5.8	97	118	9564	215	-34	965	21	174	8046	-859	219	24
USNM_213	USNM	268016	37.6801	-84.4181	USA	G	F	51.3	24.7	NA	5.2	129	120	8351	233	17	1207	14	279	8296	-917	292	15
USNM_215	USNM	116197	38.9771	-77.1573	USA	G	M	56.8	30.5	3.5	5.5	129	120	8548	237	15	1020	12	219	8741	-688	53	56
USNM_224	USNM	397176	38.0678	-75.568	USA	G	M	51.1	27.4	3.9	5.1	137	103	7899	237	34	1049	14	246	6970	-917	4	4
USNM_225	USNM	397187	38.0678	-75.568	USA	G	M	51.6	26.9	NA	5.7	137	103	7899	237	34	1049	14	246	6970	-917	4	4
USNM_227	USNM	235291	36.5073	-92.245	USA	G	M	60.2	36	4.1	6.5	138	141	8608	245	21	1102	18	221	7771	-1018	228	22
USNM_228	USNM	34867	36.6681	-93.3347	USA	G	F	47.1	26.4	NA	5.1	131	135	8551	237	16	1116	21	195	7939	-968	388	39
USNM_234	USNM	360907	35.3719	-77.964	USA	G	M	50.9	31.3	3.6	4.7	161	121	7365	254	64	1240	25	276	7971	-804	30	37
USNM_237	USNM	252999	39.2909	-81.9765	USA	H	F	50.2	25.4	NA	5.1	112	129	8638	219	-5	1028	17	212	9022	-821	250	82
USNM_239	USNM	36179	34.8473	-95.5668	USA	F	F	44.2	29.6	3.9	4.8	164	129	8207	266	53	1165	28	193	7028	-1096	225	11
USNM_240	USNM	132448	34.1517	-98.2789	USA	F	M	58.3	20.9	3.4	5.6	172	142	8531	280	59	782	39	110	7566	-1214	277	8
USNM_241	USNM	132449	34.1517	-98.2789	USA	F	M	54.1	34	4	5	172	142	8531	280	59	782	39	110	7566	-1214	277	8
USNM_242	USNM	132450	34.1517	-98.2789	USA	F	M	59.9	29.1	3.7	6.1	172	142	8531	280	59	782	39	110	7566	-1214	277	8
USNM_243	USNM	132452	34.1517	-98.2789	USA	F	M	47.4	28	3.4	5.1	172	142	8531	280	59	782	39	110	7566	-1214	277	8
USNM_244	USNM	132453	34.1517	-98.2789	USA	F	F	58.1	32.7	3.8	5.9	172	142	8531	280	59	782	39	110	7566	-1214	277	8
USNM_246	USNM	132455	34.7678	-98.5921	USA	F	M	49.9	26.5	3.8	5.6	158	137	8791	269	42	746	42	96	7822	-1151	455	21
USNM_250	USNM	273946	34.6883	-98.4495	USA	F	F	44.6	30.2	3.6	5.3	164	133	8672	274	50	761	46	93	8037	-1122	367	17
USNM_251	USNM	273966	34.7221	-98.7003	USA	F	F	51.1	34	NA	5.9	156	140	8843	267	38	739	40	98	5859	-1150	504	32
USNM_253	USNM	173088	32.7851	-79.8614	USA	F	M	40.8	28.4	NA	4.9	187	95	6480	267	100	1248	32	252	7605	-803	11	29
USNM_255	USNM	34864	36.2372	-88.0877	USA	G	F	45.8	30.4	4	5.1	143	133	8265	245	30	1342	15	352	7927	-939	123	55
USNM_257	USNM	267411	36.3561	-83.4153	USA	G	M	52.6	29	NA	5.4	127	133	7789	225	24	1241	14	320	8876	-886	479	39
USNM_258	USNM	267413	36.5385	-87.3601	USA	G	M	53.6	31.2	NA	5.2	143	134	8442	249	30	1271	16	340	7017	-826	137	2
USNM_261	USNM	112025	29.953	-98.8039	USA	E	F	42.9	32.8	3.7	5.4	191	136	6625	271	101	792	32	134	7166	-1098	408	8
USNM_262	USNM	186548	30.7527	-99.2346	USA	E	M	53.2	32.8	3.9	6	181	148	7139	268	84	665	37	97	6692	-1182	476	3
USNM_263	USNM	186547	30.7527	-99.2346	USA	E	F	51.1	30.1	3.5	5.2	181	148	7139	268	84	665	37	97	6692	-1182	476	3
USNM_265	USNM	348326	33.9628	-98.7754	USA	F	F	53.6	32.4	4.1	6	174	145	8595	282	60	711	40	98	8181	-1218	316	11
USNM_266	USNM	251440	38.0911	-75.2049	USA	G	M	55.8	27.8	4	5.7	136	99	7765	234	35	1067	14	253	4965	-1866	3	12
USNM_268	USNM	19153	38.8048	-77.0469	USA	G	M	45.7	25.9	NA	4.8	133	114	8483	241	21	1013	12	224	4018	-655	13	4
USNM_270	USNM	293195	37.2282	-80.3905	USA	G	M	49.3	31.4	2.8	6.2	112	132	7693	208	6	997	11	210	9120	-881	637	74
USNM_273	USNM	349915	38.7072	-77.156	USA	G	M	50.2	25.4	3.6	4.9	131	115	8411	236	19	997	11	224	7944	-764	26	42
USNM_274	USNM	567500	37.2282	-80.3905	USA	G	M	43.1	28	3.5	5.1	112	132	7693	208	6	997	11	210	9120	-881	637	74
USNM_275	USNM	589209	37.393	-80.5598	USA	G	F	46.6	31.5	NA	4.8	91	121	7583	185	-11	1098	11	232	8772	-858	1035	80
USNM_276	USNM	260240	38.4292	-82.3368	USA	G	F	43.1	27	NA	5.1	121	131	8316	224	9	1094	15	240	9070	-788	238	77
USNM_278	USNM	396183	39.0567	-78.9601	USA	H	M	55.1	32.2	3.9	5.8	114	140	8296	218	1	893	17	171	8475	-905	263	0
USNM_280	USNM	600217	38.9478	-77.4908	USA	G	M	58.3	35.2	NA	5.9	125	124	8507	233	12	1005	11	214	7505	-804	93	3

## Sheet: Pigmentation_data
ID	COLL	SPCMNUM	LAT	LONG	CNTRY	POPLAT	SEX	TL	DTL	DTLR	BERL	ERPIG	ERPIGBR	MTL	MTPIG	MTPIGR	MTLB	MTPIGB	MTPIGBR	FL	ChL	TeL	B1LL	B1CL	B1RL	B2LL	B2CL	B2RL	B3LL	B3CL	B3RL	AVGL	Bio1	Bio2	Bio4	Bio10	Bio11	Bio12	Bio15	Bio19	NDVIMAX	ROUGH	ELEV	TREECOV
AMNH_001	AMNH	42270	40.3808	-84.8649	USA	H	F	32.8	14.2	0.432927	NA	4.3	NA	1.4	0.7	0.5	1.1	1.1	1	53.15	61.76	63.73	49.2	39.08	40.46	40.57	35.99	46.37	44.11	40.09	36.99	41.43	98	114	9501	215	-30	933	22	169	7628	-872	296	0
AMNH_003	AMNH	135053	39.179	-96.5979	USA	H	M	32.88	7.6	0.231144	4.3	3.8	0.883721	1.7	0.3	0.176471	1.4	1.3	0.928571	67.02	77.48	68.77	44.04	38.81	40.45	50.55	44.31	54.81	48.7	40.83	56.45	46.55	120	130	10015	246	-14	861	52	70	7288	-985	345	5
AMNH_005	AMNH	142645	39.179	-96.5979	USA	H	M	21.9	7.7	0.351598	2.8	2.8	1	1.4	0.2	0.142857	1.3	0	0	68.14	71.83	68.04	50.8	40.26	63.61	49.95	40.17	51.67	48.18	39.54	48.58	48.08	120	130	10015	246	-14	861	52	70	7288	-985	345	5
AMNH_006	AMNH	142644	39.179	-96.5979	USA	H	F	29.4	11.3	0.384354	3.1	2.7	0.870968	1.5	0.8	0.533333	1.1	1.1	1	67.66	76.18	69.64	37.97	25.02	36.55	30.26	28.54	34.96	41.33	23.67	35.7	32.67	120	130	10015	246	-14	861	52	70	7288	-985	345	5
AMNH_007	AMNH	121735	41.9376	-85.0112	USA	H	F	25.9	10.3	0.397683	3.2	3.1	0.96875	1.6	1.1	0.6875	1.2	0.6	0.5	60.32	67.05	62.57	48.82	40.71	51.93	59.05	46.39	53.79	59	51.31	48.66	51.07	86	111	9520	204	-41	896	23	151	7061	-887	295	1
AMNH_011	AMNH	9071/7378	40.6707	-74.2088	USA	H	M	31.1	9.9	0.318328	3.2	2.3	0.71875	1.7	0	0	1.2	0.5	0.416667	50.01	63.9	61.76	43	41.06	42.94	40.08	37.27	42.86	50.76	36.12	36.82	41.21	118	105	8784	229	2	1181	11	260	3739	-396	11	14
AMNH_012	AMNH	3596/2791	40.7168	-74.0114	USA	H	F	26.9	9.1	0.33829	3.3	2.5	0.757576	1.4	0	0	1.1	0.5	0.454545	60.83	66.58	64.14	36.43	32.36	38.07	39.38	38.9	41.44	37.86	38.37	46.23	38.78	121	88	8735	232	7	1146	10	256	1897	-250	6	0
AMNH_013	AMNH	16664	41.3322	-73.9871	USA	H	M	26.1	6.8	0.260536	3.2	2.9	0.90625	1.6	0	0	1.1	0.5	0.454545	60.07	67.88	66.46	34.75	40.2	33.35	47.32	28.82	51.39	46.53	39.64	45.34	40.82	105	115	9020	219	-17	1165	9	258	7577	-923	48	78
AMNH_014	AMNH	16608	42.6673	-74.3193	USA	H	M	30	10.2	0.34	NA	NA	NA	1.6	0.6	0.375	1.3	1.3	1	61.19	69.96	65.53	58.3	40.18	43.3	45.56	35.4	37.29	45.64	41.12	40.38	43.02	80	119	9466	198	-47	985	14	200	7418	-954	185	62
AMNH_015	AMNH	16666	41.3322	-73.9871	USA	H	M	28.3	9.5	0.335689	3.2	3.1	0.96875	NA	NA	NA	NA	NA	NA	64.94	63.58	62.6	49.45	33.86	50.15	35.52	34.01	32.41	38.56	34.26	40.9	38.79	105	115	9020	219	-17	1165	9	258	7577	-923	48	78
AMNH_016	AMNH	180142	41.1181	-73.7984	USA	H	M	27.2	11.2	0.411765	3	2.1	0.7	1.7	0.7	0.411765	1.2	1.2	1	66.14	74.92	69.75	38.45	39.39	49.44	45.76	32.59	33.16	53.86	31.07	37.33	40.12	102	104	8808	213	-12	1245	8	279	9009	-867	149	71
AMNH_017	AMNH	180141	41.1181	-73.7984	USA	H	M	26.8	9.1	0.339552	3.5	2.9	0.828571	1.5	1	0.666667	1	1	1	68.36	79.59	67.78	55.26	34.33	36.56	38.86	33.72	31.91	50.94	35.41	36.21	39.24	102	104	8808	213	-12	1245	8	279	9009	-867	149	71
AMNH_018	AMNH	1233	40.9587	-72.9922	USA	H	F	28.9	10	0.346021	3.2	2.7	0.84375	1.6	1.6	1	1.2	1.2	1	58.93	68.07	65.85	45.76	23.33	45.95	41.46	24.3	29.73	36	31.37	37.11	35	108	97	8370	214	-1	1153	8	281	8342	-1360	38	23
AMNH_021	AMNH	146632	41.2927	-73.6692	USA	H	F	32.3	12.9	0.399381	NA	3.6	NA	1.6	0	0	1.3	1.3	1	63.92	73.6	68.58	30	31.64	28.28	43.5	27.1	43.83	33.14	29.99	49.06	35.17	102	114	8825	213	-15	1188	8	269	8593	-862	97	53
AMNH_024	AMNH	129388	41.2737	-73.7743	USA	H	M	28.5	7.9	0.277193	3.3	2.7	0.818182	1.5	0	0	1.2	0.9	0.75	64.03	72.2	65.89	39.66	38.6	44.7	43.5	37.59	41.83	46.71	32.84	45.99	41.27	100	111	8849	212	-17	1207	8	270	9072	-830	148	38
AMNH_025	AMNH	16594	35.2212	-75.6867	USA	G	M	33.4	7.8	0.233533	NA	4.7	NA	1.6	0	0	1.4	0	0	57.06	64.88	60.66	38.53	38.96	43.51	47.51	44.84	46	42.68	36.1	42.38	42.28	170	86	6719	253	83	1396	16	333	7620	-2161	3	54
AMNH_026	AMNH	16595	35.2212	-75.6867	USA	G	M	34.1	12.2	0.357771	NA	NA	NA	1.7	0.3	0.176471	1.2	0.4	0.333333	55.54	61.04	57.64	46.63	34.43	39.61	46.58	36.97	40.45	36.56	31.37	40	39.18	170	86	6719	253	83	1396	16	333	7620	-2161	3	54
AMNH_027	AMNH	16596	35.2212	-75.6867	USA	G	M	23.9	6.2	0.259414	NA	3.4	NA	1.4	0	0	0.9	0	0	56.08	69.6	57.42	36.26	29.8	32.89	36.94	32.68	32.1	34.34	38.48	35.73	34.36	170	86	6719	253	83	1396	16	333	7620	-2161	3	54
AMNH_029	AMNH	147741	35.4013	-78.8157	USA	G	M	39.8	12.3	0.309045	3.6	3.1	0.861111	1.5	0	0	1.2	0.8	0.666667	56.99	72.49	50.83	31.19	21.41	26.22	34.74	21.05	36.08	33.49	20.95	39.18	29.37	157	127	7467	251	58	1169	18	276	7462	-882	41	7
AMNH_030	AMNH	147743	35.4013	-78.8157	USA	G	F	30.3	12.5	0.412541	3.9	3.6	0.923077	1.5	0	0	1.3	1.3	1	66.48	76.69	40.17	24.88	20.36	45.78	31.42	23.53	44.22	44.27	21.47	37.21	32.57	157	127	7467	251	58	1169	18	276	7462	-882	41	7
AMNH_031	AMNH	147744	35.4013	-78.8157	USA	G	F	30.1	10.6	0.352159	3.6	3.5	0.972222	1.4	0	0	1.1	0.5	0.454545	61.78	75.95	69.52	38.79	32.97	42.54	38.93	36.19	38.81	51.59	34.17	41.23	39.47	157	127	7467	251	58	1169	18	276	7462	-882	41	7
AMNH_034	AMNH	149377	35.8097	-83.6374	USA	G	F	30	11.1	0.37	NA	3.4	NA	1.4	0	0	1	0.7	0.7	63.98	79.04	64.7	24.2	23.98	24.07	28.55	29.42	38.01	27.55	23.34	37.9	28.56	132	135	7577	227	31	1282	14	330	8499	-874	402	71
AMNH_035	AMNH	8653	29.4464	-98.4723	USA	E	M	36.9	12.5	0.338753	4.3	4.3	1	1.6	0	0	1.3	1.3	1	59.13	70.89	61.04	53	38.04	43.75	39.85	41.25	42.01	29.83	42.92	47.17	41.98	206	121	6590	288	120	696	33	126	5525	-649	215	4
AMNH_036	AMNH	8651	29.4464	-98.4723	USA	E	M	29.7	13.4	0.451178	4	4	1	1.7	0	0	1.3	0.5	0.384615	51.54	59.39	53.46	42.58	31.97	37.19	42.31	46.19	48.5	40.86	43.02	38.64	41.25	206	121	6590	288	120	696	33	126	5525	-649	215	4
AMNH_038	AMNH	14827	29.4464	-98.4723	USA	E	F	32.2	10.4	0.322981	4.1	3.9	0.95122	1.4	0	0	1.2	0.3	0.25	61.6	66.69	65.02	31.33	22.42	28.81	39.67	24.14	39.44	39.84	41.52	27.5	32.74	206	121	6590	288	120	696	33	126	5525	-649	215	4
AMNH_039	AMNH	126141	14.284	-87.2577	HON	A	F	32.8	17.1	0.521341	3.6	3.6	1	1.5	1	0.666667	1.1	1.1	1	36.67	66.08	28.75	35.74	28.77	28.21	29.67	29.56	30.92	27.34	27.69	38.75	30.74	225	117	1428	241	204	1182	70	117	7344	-960	866	21
AMNH_040	AMNH	126189	14.284	-87.2577	HON	A	F	35.1	20.9	0.595442	3.4	3.4	1	1.5	1	0.666667	1.2	1.2	1	31.43	74.1	33.99	35.79	38.1	34.52	31.89	38.51	40.72	35.15	32.08	41.04	36.42	225	117	1428	241	204	1182	70	117	7344	-960	866	21
AMNH_041	AMNH	146585	18.4007	-88.3899	BEL	B	M	31.9	16.5	0.517241	3.9	3.9	1	1.4	1.4	1	1.1	1.1	1	34.78	58.42	33.03	37.06	25.16	43.63	37.82	25.78	43.26	44.46	25.66	35.2	35.34	254	93	1570	270	232	1354	58	238	7632	-943	9	22
AMNH_042	AMNH	128477	14.284	-87.2577	HON	A	M	33.3	17.2	0.516517	NA	4.2	1	1.5	0.2	0.133333	1.1	1.1	1	40.11	67.18	40.96	47.97	36.59	54.73	44.81	29.93	47.71	43.02	37.75	40.62	42.57	225	117	1428	241	204	1182	70	117	7344	-960	866	21
AMNH_043	AMNH	128476	14.284	-87.2577	HON	A	F	30.8	19.4	0.62987	3.6	3	0.833333	1.3	1.3	1	0.9	0.9	1	44.49	57.23	34.53	38.63	42.63	37.54	44.99	31.56	37.48	38.03	40.63	35.42	38.55	225	117	1428	241	204	1182	70	117	7344	-960	866	21
AMNH_044	AMNH	123286	14.0822	-87.2143	HON	A	M	39.8	22.5	0.565327	3.2	3.2	1	1.7	1.3	0.764706	1.2	1.2	1	49.06	62.26	53.55	47.09	31.28	38.79	36.67	39.84	38.15	44.28	37.34	43.79	39.69	219	111	1308	232	201	1010	82	67	3922	-783	976	1
AMNH_045	AMNH	126193	14.2461	-87.9555	HON	A	F	31.6	20.2	0.639241	3.1	3.1	1	1.4	1.4	1	0.9	0.9	1	36.91	70.37	22.35	27.19	20.38	34.32	27.47	20.58	29.17	28.5	18.93	39.25	27.31	198	114	1387	214	180	1449	84	43	8313	-871	1319	19
AMNH_047	AMNH	172153	17.1551	-92.9	MEX	B	M	38.7	21	0.542636	4.1	4.1	1	1.7	1.3	0.764706	1.1	1.1	1	38.37	69.74	28.55	43.2	34.02	53.03	32.48	26.44	37.23	29.32	36.89	34.27	36.32	180	119	1328	192	160	2181	50	325	8190	-804	1675	17
AMNH_048	AMNH	172160	16.7284	-92.6271	MEX	B	M	35.1	24.5	0.698006	4.1	4.02	0.980488	1.7	1.4	0.823529	1.1	1.1	1	35.04	68.88	35.97	46.38	31.64	45.88	35.24	27.05	44.55	29.55	28.02	39.19	36.39	151	130	1198	162	133	1208	72	75	6884	-813	2148	3
AMNH_049	AMNH	126191	14.1397	-87.9082	HON	A	F	35.4	21.1	0.596045	3.4	3.4	1	1.4	1	0.714286	0.9	0.9	1	36.96	69.27	30.74	33.55	28.59	28.35	37.83	35.22	30.15	28.04	27.31	35.71	31.64	170	103	1467	185	151	1701	80	66	8314	-832	1797	54
AMNH_050	AMNH	128974	14.5853	-88.5848	HON	A	F	36.7	16.7	0.455041	NA	4	1	1.5	0.7	0.466667	1.1	1.1	1	42.03	56.95	26.2	30.12	32.3	40.82	40.91	30.78	39.55	33.58	35.74	31.24	35	224	123	1534	241	202	1261	74	107	6851	-898	815	29
AMNH_051	AMNH	128976	14.5853	-88.5848	HON	A	F	35.2	18.6	0.528409	3.9	3.8	1	1.4	0.9	0.642857	1.1	1.1	1	37.36	62.47	44.72	29.52	23.67	32.89	31.58	22.17	31.17	27.07	22.32	30.26	27.85	224	123	1534	241	202	1261	74	107	6851	-898	815	29
AMNH_052	AMNH	25181	20.6541	-102.329	MEX	C	M	30.2	17.1	0.566225	NA	3.9	1	1.4	1.4	1	1	1	1	28.51	55.88	27.29	43.1	26.28	33.81	48.38	20.58	43.2	46.4	19	37.94	35.41	179	162	2455	208	144	950	107	35	7636	-889	1985	16
AMNH_053	AMNH	25182	20.6541	-102.329	MEX	C	M	29.9	17.4	0.58194	3.4	3.4	1	1.6	1.6	1	1.1	1.1	1	39.65	61.79	31.68	29.64	27.46	49.1	32.22	21.12	45.77	40.23	21.3	44.95	34.64	179	162	2455	208	144	950	107	35	7636	-889	1985	16
AMNH_054	AMNH	25183	20.6541	-102.329	MEX	C	M	32.2	14.7	0.456522	NA	4.1	1	1.8	1.8	1	1.2	1.2	1	50.36	65.57	40.83	50.31	33.66	49.14	53.56	40.58	51.64	54.55	39.55	62.13	48.35	179	162	2455	208	144	950	107	35	7636	-889	1985	16
AMNH_055	AMNH	16625	20.6598	-103.347	MEX	C	F	32.2	16.9	0.524845	NA	3.5	1	1.7	NA	NA	1.2	1.2	1	42.98	57.19	36.92	37.03	25.81	45.7	56.93	33.26	49.62	40.04	29.24	40.7	39.81	197	161	2462	225	162	939	111	37	2014	-359	1546	1
AMNH_056	AMNH	16626	20.6598	-103.347	MEX	C	F	34.2	16.4	0.479532	NA	3	1	NA	NA	NA	1.2	1.2	1	41.8	58.99	37.3	32.01	37.82	44.33	43.98	38.57	44.51	42.21	37.22	43.57	40.47	197	161	2462	225	162	939	111	37	2014	-359	1546	1
AMNH_057	AMNH	16629	20.6598	-103.347	MEX	C	F	34.5	17.7	0.513043	NA	3.4	1	NA	NA	NA	0.5	0.5	1	36.17	64.49	34.13	60.92	27.35	36.16	44.67	36.05	41.84	55.98	28.66	47.53	42.13	197	161	2462	225	162	939	111	37	2014	-359	1546	1
AMNH_058	AMNH	26017	19.71	-103.471	MEX	C	M	30.7	15.4	0.501629	3.2	3.2	1	1.5	1.5	1	1	1	1	50.58	64.38	46.66	54.84	32.53	56.93	42.77	41.73	51.14	50.48	34.2	50.31	46.1	194	150	1932	215	165	614	97	49	4960	-827	1514	4
AMNH_059	AMNH	25184	20.6574	-104.51	MEX	C	M	29.9	13.3	0.444816	NA	3.9	1	1.6	1.3	0.8125	1.2	1.2	1	37.36	65.69	32.64	40.97	28.75	37.09	40.17	42.05	39.59	35.35	40.32	39.33	38.18	230	167	2461	256	204	882	107	39	8220	-839	1003	35
AMNH_060	AMNH	25188	20.6574	-104.51	MEX	C	M	38.1	18.4	0.48294	NA	4.9	1	1.8	1.8	1	1.2	1.2	1	43.69	64.41	29.81	39.94	34.72	44.62	41.58	33.25	49.69	42.76	35.07	39.21	40.09	230	167	2461	256	204	882	107	39	8220	-839	1003	35
AMNH_061	AMNH	25852	20.5776	-104.433	MEX	C	F	39.2	24	0.612245	NA	NA	1	1.4	1.4	1	1	1	1	32.77	62.38	45.53	40.19	32.36	39.33	52.31	22.83	43.86	29.03	19.73	42.25	35.77	162	143	1970	184	150	1064	105	61	8425	-842	1937	37
AMNH_062	AMNH	145179	16.2225	-94.856	MEX	B	M	37.4	19.3	0.516043	4.4	4.4	1	1.7	1.1	0.647059	1.2	1.2	1	52.43	62.22	46.17	52.13	53.01	57.54	59.31	59.72	57.6	56.93	54.45	51.85	55.84	273	102	1367	288	254	1216	113	10	7031	-1538	6	6
AMNH_063	AMNH	145951	16.3184	-94.754	MEX	B	M	32.3	24.6	0.76161	NA	3.3	1	1.5	1.5	1	1.1	1.1	1	40.84	64.34	28.49	42.95	35.04	39.42	40.81	29.91	50.87	37.96	34.67	38.33	38.88	271	103	1442	286	250	1066	112	6	6845	-1207	40	2
AMNH_064	AMNH	145180	16.2225	-94.856	MEX	B	M	34.9	19.3	0.553009	3.5	3.8	1	1.5	1.5	1	1.1	1.1	1	53.3	66.02	50.19	55.8	54.1	59.29	56.56	50.2	49.25	56.66	50.36	48.54	53.42	273	102	1367	288	254	1216	113	10	7031	-1538	6	6
AMNH_065	AMNH	145181	16.2225	-94.856	MEX	B	F	37.9	17.8	0.469657	4.1	4.1	1	1.7	1.7	1	1.1	1.1	1	51.43	64.07	31.48	31.85	26.04	40.57	31.24	30.4	54.12	38.48	21.17	43.9	35.31	273	102	1367	288	254	1216	113	10	7031	-1538	6	6
AMNH_066	AMNH	145629	16.2225	-94.856	MEX	B	M	42.1	26.2	0.622328	NA	NA	1	1.6	1.6	1	1.2	1.2	1	36.39	62.48	39.68	41.3	20.3	29.46	41.28	19.45	34.1	27.04	17.95	37.01	29.77	273	102	1367	288	254	1216	113	10	7031	-1538	6	6
AMNH_067	AMNH	145175	16.4266	-95.4102	MEX	B	F	31.5	18.9	0.6	NA	NA	1	1.4	1.4	1	1	1	1	37.16	62.71	33.67	49.22	39.96	61.62	56.9	44.85	57.71	51.64	42.89	42.08	49.65	269	122	1483	285	247	748	115	4	8611	-977	234	39
AMNH_068	AMNH	145176	16.4266	-95.4102	MEX	B	M	32.1	19.1	0.595016	3	3	1	1.5	1.5	1	1.1	1.1	1	32.24	63.61	35.42	49.27	23.22	45.88	34.6	22.47	41.6	33.28	19.83	31.16	33.48	269	122	1483	285	247	748	115	4	8611	-977	234	39
AMNH_069	AMNH	145956	16.3326	-95.2227	MEX	B	M	38.2	34.5	0.903141	3.9	4.5	1	1.7	1.7	1	1.3	1.3	1	43.61	69.43	39.3	59.02	34.09	43.52	52.07	36.08	47.42	52.96	34.95	52.69	45.87	276	107	1390	290	256	870	114	11	5533	-930	45	0
AMNH_070	AMNH	145634	16.4175	-95.3327	MEX	B	M	29.8	17.3	0.580537	3.2	4	1	1.5	1.5	1	1.1	1.1	1	30.76	67.46	27.44	30.31	32.71	38.85	30.57	35.44	38.69	34.9	27.12	41.59	34.46	276	116	1431	291	256	849	117	8	8507	-891	78	35
AMNH_071	AMNH	145955	16.3328	-95.2277	MEX	B	M	38.2	24.6	0.643979	3.4	3.9	1	1.7	1.7	1	1.2	1.2	1	42.98	64.27	36.74	40.58	22.16	45.52	40.25	21.47	31.03	29.79	21.68	31.59	31.56	276	107	1385	291	256	866	113	11	3896	-930	53	0
AMNH_072	AMNH	145958	16.3326	-95.2227	MEX	B	F	37.5	24.8	0.661333	NA	NA	1	NA	NA	NA	NA	NA	NA	47.68	58.04	47.2	60.96	28.79	58.73	55.18	35.45	58.03	58.15	36.99	56.25	49.84	276	107	1390	290	256	870	114	11	5533	-930	45	0
AMNH_073	AMNH	24717	22.8352	-105.787	MEX	C	F	37.3	23.1	0.619303	NA	NA	1	1.6	1.6	1	1.2	1.2	1	48.65	61.24	43.69	52.55	29.12	50.06	45.26	33.08	47.85	39.83	23.05	44.88	40.63	250	108	3035	284	209	864	93	68	4975	-938	21	12
AMNH_074	AMNH	24718	22.8352	-105.787	MEX	C	M	36.4	18.5	0.508242	NA	NA	1	1.7	1.7	1	1.2	1.2	1	41.22	64.6	38.8	30.85	23.41	30.1	33.11	20.76	32.63	36.93	21.16	40.85	29.98	250	108	3035	284	209	864	93	68	4975	-938	21	12
AMNH_075	AMNH	24720	22.8352	-105.787	MEX	C	F	36.8	22.2	0.603261	NA	NA	1	1.5	1.5	1	1.2	1.2	1	41.61	58.8	35.71	26.24	31	28.75	34.67	21.39	38.12	36.56	19.78	25.87	29.15	250	108	3035	284	209	864	93	68	4975	-938	21	12
AMNH_076	AMNH	131205	30.779	-84.9508	USA	E	F	31.6	12.4	0.392405	3.4	3.1	0.911765	1.4	0.7	0.5	1	1	1	59.35	66.04	63.66	45.66	37.43	60.3	53.87	29.05	53.14	46.39	30.24	49.55	45.07	194	134	6143	268	111	1418	22	359	8578	-1017	36	58
AMNH_077	AMNH	131206	30.779	-84.9508	USA	E	F	27.7	11.6	0.418773	3.3	3.2	0.969697	1.5	0	0	1.1	1.1	1	61.61	73.29	65.44	50.37	31.42	56.91	37.43	25.42	51.77	26.23	30.05	48.7	39.81	194	134	6143	268	111	1418	22	359	8578	-1017	36	58
AMNH_078	AMNH	91144	30.8618	-82.2584	USA	E	F	28.4	12.1	0.426056	NA	5	NA	1.7	0	0	1.2	1.2	1	55.41	64.48	52.85	37.99	27.21	38.84	36.2	28.06	46.54	39.86	32.14	48.65	37.28	196	137	5854	267	117	1318	34	284	9624	-881	45	60
AMNH_079	AMNH	182029	27.7915	-82.6411	USA	E	F	36.4	16	0.43956	NA	4.3	1	1.5	0	0	1.1	1.1	1	62.6	70.4	63.6	47.16	25.51	22.42	48.48	24.04	35.15	39.22	19.93	36.76	33.19	225	94	4551	278	162	1227	55	198	5839	-838	14	0
AMNH_080	AMNH	100088	30.8403	-83.9658	USA	E	F	29.7	9.9	0.333333	4.6	4.6	1	1.6	0	0	1.1	0.6	0.545455	58.66	67.52	58.1	25.9	27.58	39.9	23.09	24.87	25.88	37.2	20.86	26.93	28.02	193	135	6066	267	112	1368	24	345	7528	-922	89	7
AMNH_081	AMNH	93125	30.8734	-83.8423	USA	E	M	31.1	7.9	0.254019	4.2	4	0.952381	1.5	0	0	1.2	0	0	58.02	74.04	69.8	39.9	36.36	48.78	48.19	41.8	51.8	59.6	28.6	46.4	44.6	194	135	6074	267	112	1336	24	336	9006	-905	68	51
AMNH_082	AMNH	24722	22.8352	-105.787	MEX	C	M	35.7	16.7	0.467787	3.1	3.1	1	1.6	1.6	1	1.2	1.2	1	38.95	57.51	42.03	43.77	22.92	27.03	46.03	19.98	29.15	31.22	20.96	38.08	31.02	250	108	3035	284	209	864	93	68	4975	-938	21	12
AMNH_083	AMNH	24725	22.8352	-105.787	MEX	C	F	32.4	18.3	0.564815	NA	NA	1	1.7	1.7	1	1.2	1.2	1	35.58	63.64	30.81	39.33	26.2	45.58	32.97	27.67	38.17	38.02	22.32	25	32.81	250	108	3035	284	209	864	93	68	4975	-938	21	12
AMNH_084	AMNH	24726	22.8352	-105.787	MEX	C	M	35.1	19.7	0.561254	NA	NA	1	1.5	1.5	1	1.1	1.1	1	45.31	66.42	41.53	52.7	38.17	51.43	51.09	38.33	44.74	46.83	36.5	56.49	46.25	250	108	3035	284	209	864	93	68	4975	-938	21	12
AMNH_085	AMNH	24727	22.8352	-105.787	MEX	C	M	38.7	22.6	0.583979	NA	3.8	1	1.6	1.6	1	1.2	1.2	1	41.78	63.52	39.65	41.08	34.02	40.78	45.86	32.92	47.42	44.26	33.94	50.7	41.22	250	108	3035	284	209	864	93	68	4975	-938	21	12
AMNH_086	AMNH	146770	24.0829	-99.1103	MEX	D	F	33.3	24.1	0.723724	NA	3.9	1	NA	NA	1	1.1	1.1	1	46.32	68.44	47.8	50.43	30.36	32.74	42.07	36.86	46.12	36.13	37.63	44.02	39.6	237	138	4686	290	172	727	72	51	5946	-1003	195	9
AMNH_087	AMNH	172164	18.7752	-95.7594	MEX	B	F	38.7	22.3	0.576227	4	4	1	1.5	0.8	0.533333	1.1	1.1	1	41.01	64.15	27.12	34.23	27.07	41.66	30.26	25.66	33.67	34.66	30.89	30.92	32.11	261	84	2034	281	231	1681	82	129	7800	-1398	50	9
AMNH_088	AMNH	172157	17.4381	-95.0234	MEX	B	M	31.8	15.6	0.490566	3.9	3.9	1	1.5	1.5	1	1	1	1	45.13	69.79	32.57	52.48	37.53	32.38	36.15	36.56	35.73	37.06	31.64	40.01	37.73	253	106	2138	278	223	2345	85	193	8141	-882	28	18
AMNH_089	AMNH	172159	17.4381	-95.0234	MEX	B	F	38	19.8	0.521053	4.1	4.1	1	1.5	1.5	1	1.1	1.1	1	34.89	51.33	26.64	38.34	30.71	33.77	37.6	28.42	31.9	31.32	31.39	41.78	33.91	253	106	2138	278	223	2345	85	193	8141	-882	28	18
AMNH_091	AMNH	30524	20.9747	-89.6131	MEX	C	M	23.5	15.8	0.67234	3.4	3.4	1	1.5	1	0.666667	1.1	1.1	1	30.03	57.98	36.03	51.33	33.62	37.8	38.46	34.93	48.74	45.52	40.98	39.05	41.16	258	102	1930	276	230	958	70	95	4578	-576	11	1
AMNH_092	AMNH	1899/1164	29.639	-82.3221	USA	E	F	24.8	7.7	0.310484	3.1	2.5	0.806452	1.3	0	0	1.1	1.1	1	48.95	64.67	56.16	27.39	24.56	31.8	33.64	24.65	43.51	30.83	22.24	41.77	31.15	204	128	5315	268	133	1327	41	275	7919	-873	30	24
AMNH_093	AMNH	1900/1165	29.639	-82.3221	USA	E	F	30.4	10.3	0.338816	NA	4.8	NA	1.6	1.1	0.6875	1.1	1.1	1	48.86	62.08	54.7	33.65	31.68	34.45	45.01	31.35	37.89	40.22	33.74	48.23	37.36	204	128	5315	268	133	1327	41	275	7919	-873	30	24
AMNH_094	AMNH	163976	28.7958	-82.5898	USA	E	F	26.1	10.9	0.417625	3.4	3.5	0.911765	1.3	0	0	1	1	1	49.58	65.53	61.53	45.92	29.44	29.41	40.54	29.22	44.25	39.68	36.56	33.08	36.46	212	129	4869	270	147	1363	48	242	8666	-988	15	55
AMNH_096	AMNH	243428	27.1812	-81.3507	USA	E	F	30.8	11.3	0.366883	3	3	1	1.6	0.9	0.5625	1.1	1.1	1	45.51	60.81	53.61	27.49	22.46	34.11	35.9	28.22	32.6	29.31	26.82	33.31	30.02	222	133	4125	270	165	1253	59	159	7058	-998	45	17
AMNH_097	AMNH	243429	27.2673	-81.3641	USA	E	F	26.7	10.5	0.393258	3.3	3.2	0.969697	1.6	1.1	0.6875	1.1	0.8	0.727273	46.99	60.19	37.42	33.54	18.74	26.28	40.03	24.97	41.15	42.44	18.73	25.54	30.16	223	132	4152	272	165	1223	58	160	6784	-1029	32	11
AMNH_098	AMNH	243430	27.2673	-81.3641	USA	E	M	31.7	9.5	0.299685	3.9	3.7	0.948718	1.7	0	0	1.3	0.4	0.307692	42.72	60.75	57.05	28.32	21.52	23.86	30.81	23.38	31.77	48.6	21.33	34.14	29.3	223	132	4152	272	165	1223	58	160	6784	-1029	32	11
AMNH_099	AMNH	131201	30.3158	-84.135	USA	E	F	29.6	14.7	0.496622	3.8	3.2	0.842105	1.5	0.7	0.466667	1.1	1.1	1	57.04	69.04	60.11	31.04	30.21	40.47	49.42	25.16	36.85	50.19	29.25	44.38	37.44	196	132	5899	268	118	1482	28	343	8733	-991	19	69
AMNH_100	AMNH	131204	30.4348	-84.2718	USA	E	M	26.5	15.2	0.573585	4.1	4	0.97561	1.7	0	0	1.1	1.1	1	60.51	64.19	54.41	47.38	42.6	47.99	48.95	38.85	46.02	41.76	38.6	48.77	44.55	194	131	5965	267	115	1500	26	352	6504	-812	56	8
CNMA_002	CNMA	34858	19.3234	-99.1852	MEX	C	M	35.2	17.4	0.494318	3.9	3.9	1	1.6	1.6	1	1.7	1.7	1	35.47	67.04	31.25	31.91	33.25	30.9	46.4	33.24	43.53	34.52	26.86	35.39	35.11	156	172	2118	179	129	839	96	24	6365	-309	2309	14
CNMA_003	CNMA	43374	19.3125	-99.1881	MEX	C	F	37.9	21.1	0.556728	NA	4.5	1	1.5	1.5	1	1.5	1.5	1	33.92	61.99	40.16	41.89	24.33	37.32	40.42	25.22	46.25	31.11	29.53	42.6	35.41	156	172	2133	179	126	847	95	24	6809	-330	2318	35
CNMA_004	CNMA	43372	19.3125	-99.1881	MEX	C	M	31.9	19.5	0.611285	NA	4	1	1.6	1.2	0.75	1.7	1.7	1	42.11	68.33	31.61	34.96	37.13	45.42	42.34	35.38	43.91	39.17	35.05	39.14	39.17	156	172	2133	179	126	847	95	24	6809	-330	2318	35
CNMA_005	CNMA	4254	19.3326	-99.1855	MEX	C	F	30.6	14.8	0.48366	4	4	1	1.3	1.3	1	1.4	1.4	1	29.33	51.96	23.24	31.02	29.75	49.88	37.8	27.69	40.39	26.99	28.06	35.34	34.1	158	172	2083	181	129	832	95	23	4767	-309	2291	4
CNMA_006	CNMA	33417	19.3326	-99.1855	MEX	C	F	32.9	22.8	0.693009	3.8	3.8	1	1.3	1.3	1	1.3	1.3	1	35.03	65.56	27.36	34.36	20.66	37.66	39.47	28.72	39.04	37.62	29.03	30.29	32.98	158	172	2083	181	129	832	95	23	4767	-309	2291	4
CNMA_008	CNMA	23070	19.3178	-99.1841	MEX	C	M	38.9	25.6	0.658098	NA	5.2	1	1.6	1.3	0.8125	1.5	1.5	1	31.14	59.31	25.01	25.99	24.37	58.21	25.04	30.99	42.06	25.4	34.64	42.34	34.34	156	172	2118	179	126	839	96	24	6365	-309	2309	14
CNMA_009	CNMA	45114	19.3207	-99.1777	MEX	C	M	32.2	19.8	0.614907	NA	4	1	1.5	1.1	0.733333	1.4	1.4	1	26.29	69.01	28.39	36.09	24.98	37.15	28.43	25.81	36.41	35.06	28.02	43.35	32.81	158	172	2084	180	128	830	95	24	3538	-288	2294	12
CNMA_010	CNMA	45113	19.3225	-99.1947	MEX	C	F	38.9	21.7	0.557841	NA	4.9	1	1.6	1.6	1	1.5	1.5	1	28.9	54.67	34.05	36.94	26.28	39.5	37.41	22.45	25.94	38.38	25.42	34.48	31.87	156	172	2119	179	127	847	95	30	6284	-309	2328	12
CNMA_011	CNMA	45116	19.3253	-99.1892	MEX	C	F	37.1	21.5	0.579515	NA	4.6	1	1.6	1.6	1	1.7	1.7	1	39.66	71.29	38.26	51.39	22.01	40.13	32.4	27.2	35.66	31.23	28.24	36.35	33.85	158	172	2083	181	127	832	95	30	4767	-309	2291	4
CNMA_013	CNMA	4159	20.8422	-100.744	MEX	C	F	33.5	22.2	0.662687	NA	3.1	NA	1.4	1.4	1	1.5	1.5	1	50.39	67.64	43.31	43.5	32.92	31.29	40.44	39.99	56.79	39.45	41.15	37.6	40.35	169	151	2296	195	136	632	91	39	6893	-1034	2217	33
CNMA_014	CNMA	21866	21.1403	-100.066	MEX	C	M	36.3	18.2	0.501377	NA	3.6	1	1.5	1.5	1	1.5	1.5	1	36.47	74.72	31.62	48.07	30.68	54.46	53.35	27.2	57.32	41.65	30.09	42.79	42.85	202	171	2647	230	163	471	80	28	4315	-986	1572	2
CNMA_015	CNMA	3522	16.69	-99.6256	MEX	B	M	32.1	16.6	0.517134	NA	4.4	1	1.6	1.6	1	1.4	1.4	1	42.61	64.72	33.41	49.02	27.67	55.38	40.37	18.72	46.31	51.4	20.38	46.01	39.47	202	171	2647	230	277	471	80	15	NA	NA	NA	NA
CNMA_016	CNMA	15637	16.8272	-99.8047	MEX	B	M	36.2	18.1	0.5	3.7	3.5	0.945946	1.4	1.4	1	1.4	1.4	1	44.2	66.67	26.86	56.98	21.03	44.69	53.87	20.99	50.61	37.99	19.8	39.35	38.37	284	111	721	292	274	1116	110	18	8751	-776	15	38
CNMA_017	CNMA	45117	16.9725	-100.015	MEX	B	M	38.4	22.6	0.588542	3.2	3.2	1	1.6	1.6	1	1.3	1.3	1	32.55	67.07	35.96	52.17	48.22	61.15	47.52	40.59	38.47	42.59	19.54	38.92	43.24	284	110	752	293	273	999	111	14	8625	-909	17	43
CNMA_020	CNMA	11687	18.3153	-99.93	MEX	B	M	41.2	21.6	0.524272	3.6	3.6	1	1.6	1.6	1	1.4	1.4	1	34.01	69.04	35.87	56.6	30.78	36.36	38.37	24.62	40.56	45.57	29.58	43.35	38.42	236	144	1696	260	218	1038	111	17	8183	-842	1225	8
CNMA_024	CNMA	3788	19.4817	-98.8235	MEX	C	M	43.9	21.5	0.489749	4	4	1	1.8	1.8	1	1.5	1.5	1	41.08	60.11	35.54	43.81	31.24	42.08	48.57	43.14	50.24	54.88	42.39	50.99	45.26	143	177	1965	164	117	626	81	23	5585	-835	2468	3
CNMA_026	CNMA	9758	19.0706	-99.3308	MEX	C	M	37.1	19.2	0.51752	NA	3.6	1	1.6	1.6	1	1.5	1.5	1	33.6	64.28	36.51	35.6	19.41	24.95	33.34	22.8	34.5	24.63	18.25	31.49	27.22	110	143	1377	126	93	1318	95	53	8176	-986	3199	80
CNMA_028	CNMA	26454	18.8678	-99.4403	MEX	B	F	36.2	23.6	0.651934	3.7	3.7	1	1.3	1.3	1	1.3	1.3	1	42.83	61.92	41.85	48.05	32.13	35.83	37.9	31.97	37.37	40.21	29.66	49.65	38.09	209	141	1513	230	193	1077	103	41	8277	-844	1572	39
CNMA_031	CNMA	26460	18.8517	-99.4122	MEX	B	M	41.2	23.5	0.570388	4.1	4.1	1	1.6	1.6	1	1.6	1.6	1	40.73	61.42	40.08	40.72	35.28	37.64	41.08	40.03	47.57	39.79	39.34	46.85	40.92	215	144	1564	237	197	1094	103	42	8596	-841	1457	49
CNMA_035	CNMA	1193	25.6733	-100.342	MEX	D	M	35.5	14.2	0.4	NA	5.1	NA	1.4	1.4	1	1.3	1.3	1	42.8	68.62	39.98	43.65	38.55	41.2	36.3	47.25	40.95	44.44	46.47	41.89	42.3	219	122	4997	277	149	574	76	45	2776	-392	559	2
CNMA_037	CNMA	45141	18.1336	-97.8253	MEX	B	M	42.7	21.5	0.503513	NA	5.1	1	1.6	1.6	1	1.4	1.4	1	41.72	72.9	37.82	50.75	37.78	29.6	41.97	42.22	36.18	42.82	32.95	49.19	40.38	206	170	1958	228	178	584	101	14	6026	-975	1595	9
CNMA_038	CNMA	2475	16.3669	-94.1944	MEX	B	F	32.7	23.4	0.715596	3.6	3.6	1	1.5	1.5	1	1.2	1.2	1	29.45	66.74	22.23	39.89	30.23	44.3	34.56	26.85	45.31	36.66	39.17	41.26	37.58	267	120	1005	279	254	1608	106	12	7204	-822	59	12
CNMA_040	CNMA	3790	20.1066	-97.3564	MEX	C	M	33.6	15.7	0.467262	NA	4.5	1	1.7	1.2	0.705882	1.5	1.5	1	36.99	69.35	23.3	46.86	28.15	28.44	44.05	34.29	54.64	35.02	31.55	31.97	37.22	225	109	2961	254	188	2281	49	290	8525	-849	379	7
CNMA_043	CNMA	21991	22.4382	-99.3057	MEX	C	F	35.4	22.3	0.629944	3.6	3.6	1	1.3	1.3	1	1.3	1.3	1	27	61.67	30.87	24.2	21.39	38.78	22.47	38.44	49.87	29.76	22.84	25.1	30.32	235	117	3760	273	182	1278	85	66	8127	-846	260	26
CNMA_044	CNMA	21989	22.4382	-99.3057	MEX	C	F	37	17.9	0.483784	NA	4.5	1	1.6	1.6	1	1.3	1.3	1	33.06	62.21	39.22	46.37	19.74	57.94	45.21	42.34	41.1	30.07	18.27	31.13	36.91	235	117	3760	273	182	1278	85	66	8127	-846	260	26
CNMA_047	CNMA	21990	22.4382	-99.3057	MEX	C	M	43	24.8	0.576744	4.4	4.4	1	1.8	1.3	0.722222	1.5	1.5	1	42.03	68.76	31.87	49.47	27.99	51.82	39.32	25.1	44.68	51.67	37.39	38.19	40.63	235	117	3760	273	182	1278	85	66	8127	-846	260	26
CNMA_048	CNMA	45120	22.8213	-105.788	MEX	C	F	35.7	15.8	0.442577	3.6	3.6	1	1.5	1.5	1	1.4	1.4	1	50.41	66.29	37.41	41.5	33.32	43.54	48.1	33.48	54.38	40.05	29.36	41.26	40.55	249	108	3019	284	209	865	93	67	7038	-938	16	11
CNMA_051	CNMA	26116	24.6095	-98.7222	MEX	D	F	33.2	17.9	0.539157	3.4	3.4	1	1.4	1.4	1	1.3	1.3	1	50.09	63.27	23.6	29.7	27.15	28.06	33.35	31.52	47.3	31.1	31.07	31.82	32.34	206	134	4228	254	148	869	69	90	8582	-1037	829	39
CNMA_053	CNMA	45124	18.6192	-95.6612	MEX	B	M	39.6	20	0.505051	NA	4.2	1	1.4	1.4	1	1.3	1.3	1	31.03	60.69	29.37	37.1	35.45	46.25	39.7	30.2	50.93	38.9	23.1	40.1	37.97	267	88	1784	285	241	1751	75	185	8010	-920	3	18
CNMA_054	CNMA	38011	20.0162	-97.1416	MEX	C	M	45.6	18.6	0.407895	NA	5.2	1	1.6	1.2	0.75	1.4	1.4	1	50.66	68.66	56.12	56.22	35.05	57.05	48.05	39.22	56.57	46.61	53.37	50.8	49.22	239	115	2694	266	199	1441	47	218	7912	-814	171	12
CNMA_055	CNMA	45123	18.6192	-95.6612	MEX	B	M	34.5	19	0.550725	NA	4.5	1	1.5	1.5	1	1.4	1.4	1	39.24	66.56	24.48	32.88	25.67	42.85	49.82	28.06	38.73	49.24	36.58	37.9	37.97	267	88	1784	285	241	1751	75	185	8010	-920	3	18
CNMA_056	CNMA	45125	18.6192	-95.6612	MEX	B	F	38.1	18.9	0.496063	NA	4.2	1	1.5	1.5	1	1.4	1.4	1	37.87	63.03	30.67	39.47	28.1	34.65	27.72	33.26	39.79	55.4	32.3	48.95	37.74	267	88	1784	285	241	1751	75	185	8010	-920	3	18
CNMA_057	CNMA	45126	18.6192	-95.6612	MEX	B	F	34.1	21.8	0.639296	NA	4.6	1	1.6	1	0.625	1.5	1.5	1	33.16	55.24	40.2	47.05	28.35	44.57	33.3	47	45.16	36.35	25.25	58.49	40.61	267	88	1784	285	241	1751	75	185	8010	-920	3	18
CNMA_058	CNMA	45127	18.6192	-95.6612	MEX	B	M	41.8	21.1	0.504785	NA	4.9	1	1.5	1.5	1	1.2	1.2	1	41.39	57.95	43.46	48.45	26.67	56.97	46.28	33.45	57.06	36.64	33.44	44.82	42.64	267	88	1784	285	241	1751	75	185	8010	-920	3	18
MALH_001	MALH	03466	21.3325	-99.4364	MEX	C	M	34.1	20.9	0.612903	3.6	3.6	1	1.4	0.9	0.642857	1.3	1.3	1	46.64	66.82	33.21	43.58	30.29	48.82	51.89	35.32	41.75	36.14	31.72	44.61	40.46	206	149	2855	235	166	894	87	50	8124	-916	1439	32
MALH_002	MALH	03465	19.3216	-99.1902	MEX	C	F	36.4	18.6	0.510989	4.1	4.1	1	1.5	1.5	1	1.3	1.3	1	42.49	58.37	24.25	27.14	22.3	32.15	22.56	31.09	25.76	23.63	32.15	35.72	28.06	156	172	2118	179	126	839	96	24	6365	-309	2309	14
MALH_004	MALH	03472	18.7388	-99.444	MEX	B	F	37.6	18.8	0.5	3.6	3.6	1	1.3	1.3	1	1.2	1.2	1	34.38	72.52	31.74	31.35	28.86	28.65	45.9	29.76	57.76	47.78	33.73	60.56	40.48	241	169	1883	265	215	903	105	24	8461	-876	1049	27
MALH_006	MALH	03468	19.3216	-99.1902	MEX	C	F	35.8	20.6	0.575419	NA	4	1	1.4	1.4	1	1.2	1.2	1	37.99	59.32	33.21	27.8	28.15	36.3	36.17	32.35	44.89	35.22	29.23	38.22	34.26	156	172	2118	179	126	839	96	24	6365	-309	2309	14
MALH_008	MALH	1397	21.2846	-99.4701	MEX	C	F	34.2	17.5	0.511696	3.3	3.3	1	1.4	1.4	1	1.2	1.2	1	45.34	66.12	38.3	55.4	46.29	48.85	58.47	37.51	60.06	45.51	43.23	42.49	48.65	227	145	3356	263	180	964	91	56	7533	-882	880	40
MALH_009	MALH	03475	18.9016	-95.9557	MEX	B	M	38.5	15.8	0.41039	NA	4.6	1	1.5	1.5	1	1.3	1.3	1	36.3	65.51	45.93	27.83	30.33	40.91	57.42	35.17	47.52	44.11	19.75	50.06	39.23	261	86	2172	282	228	1542	93	86	8458	-1075	17	66
MALH_010	MALH	03473	19.3302	-96.6281	MEX	C	M	37.4	18.4	0.491979	NA	4.3	NA	1.6	1.6	1	1.5	1.5	1	45.02	62.23	31.64	35.47	28.57	34.31	39.17	31.04	40.94	43.73	26.57	32.45	34.69	247	117	2261	271	214	980	95	54	8470	-857	256	40
MALH_011	MALH	0045	18.3351	-94.7507	MEX	B	M	36.5	18.8	0.515068	4	4	1	1.4	0.3	0.214286	1.2	1.2	1	52.07	64.38	28.29	39	28.55	37.42	35.25	31.77	34.52	50.17	27.93	42.22	36.31	244	91	1948	264	216	2490	65	362	8867	-838	224	38
MALH_013	MALH	03476	19.3302	-96.6281	MEX	C	F	33.1	21	0.634441	3.1	3.1	1	1.5	1.5	1	1.3	1.3	1	57.29	62.43	39.07	47.77	35.29	46.41	45.05	37.23	61.87	49.39	31.94	55.21	45.57	247	117	2261	271	214	980	95	54	8470	-857	256	40
MALH_014	MALH	925	17.4748	-100.173	MEX	B	F	38.2	19.1	0.5	4	4	1	1.4	0.9	0.642857	1.3	1.3	1	34.47	59.58	23.96	41.93	22.39	38.65	33.78	20.35	41.76	32.11	19.19	38.29	32.05	152	101	737	162	149	1756	99	51	8465	-797	2655	59
MALH_015	MALH	931	17.5551	-99.6856	MEX	B	M	39.9	19.3	0.483709	NA	4.3	1	1.4	0	0	1.3	1.3	1	41.37	63.67	32.46	58.66	27.73	53.44	58.46	40.96	57.04	52.97	37	56.17	49.16	182	110	918	195	171	1498	102	37	8269	-855	2250	73
MVZ_005	MVZ	100067	19.1477	-101.442	MEX	C	F	31.7	15.2	0.479495	4.3	5.1	1	1.5	1.5	1	1.4	1.4	1	37.35	55.11	27.55	35.12	20.16	45.01	40.31	19.83	33.56	25.28	19.65	27.85	29.64	233	160	1639	256	215	1086	113	27	8400	-858	1192	22
MVZ_006	MVZ	100074	19.2095	-101.457	MEX	C	M	34.3	19.6	0.571429	3.9	3.9	1	1.6	1.3	0.8125	1.4	1.4	1	41.1	68.61	35.27	66.4	26.41	54.25	51.95	19.95	59.02	41.56	19.71	44.92	42.69	208	161	1683	231	181	1143	111	32	8394	-844	1482	33
MVZ_007	MVZ	91164	25.5256	-100.308	MEX	D	F	31.1	11.3	0.363344	4.6	4.6	1	1.1	1.1	1	1.2	1.2	1	51.38	67.76	27.6	50.58	44.26	52.43	37.61	28.66	51.04	47.45	39.51	42.37	43.77	151	136	2607	181	115	593	79	45	7641	-824	1854	44
MVZ_008	MVZ	85261	27.225	-109.259	MEX	E	M	32.6	18.1	0.555215	3.3	4	1	1.7	0.7	0.411765	1.5	1.5	1	38.54	72.91	35.71	39.4	37.88	36.88	44.89	36.29	52.21	47.16	38.51	53.2	42.94	253	175	5008	313	188	525	120	53	6405	-1008	79	15
MVZ_009	MVZ	85262	27.225	-109.259	MEX	E	F	33.6	19.4	0.577381	3.6	3.5	0.972222	1.5	1.5	1	1.3	1.3	1	44.66	68.95	38.11	37.79	19.7	64.07	57.1	25.09	41.52	47.14	21.94	54.69	41	253	175	5008	313	188	525	120	53	6405	-1008	79	15
MVZ_010	MVZ	121179	18.5322	-95.3072	MEX	B	F	32.8	14.9	0.454268	NA	4.8	1	1.4	1.4	1	1.5	1.5	1	50.06	68.51	43.61	37.38	31.75	44.15	40.09	36.07	43.65	36.83	29.05	35.02	37.11	243	92	2184	268	213	2778	65	420	7933	-826	296	12
MVZ_011	MVZ	85264	27.225	-109.259	MEX	E	M	38.2	17.9	0.468586	NA	4.1	1	1.8	1.8	1	1.4	1.4	1	39.42	71.71	42.95	56.87	33.28	57.6	54.69	39.44	64.21	46.43	41.31	51.21	49.45	253	175	5008	313	188	525	120	53	6405	-1008	79	15
MVZ_012	MVZ	85263	27.225	-109.259	MEX	E	F	40.3	18.6	0.461538	NA	4.3	1	1.4	1.4	1	1.3	1.3	1	45.26	59.42	43.71	54.52	44.37	57.41	56.45	41.08	59.19	43.6	37.49	47.47	49.06	253	175	5008	313	188	525	120	53	6405	-1008	79	15
MVZ_014	MVZ	81582	30.089	-94.144	USA	E	F	29.2	7.8	0.267123	NA	NA	1	1.7	0	0	1.5	1.1	0.733333	58.88	67.66	64.44	53.05	39.84	59.86	50.31	34.84	62.44	56.27	43.02	52.28	50.21	197	116	6336	274	111	1425	17	336	5914	-770	13	30
MVZ_015	MVZ	33460	37.8725	-122.245	USA	G	F	28.2	10.9	0.386525	NA	NA	NA	1.4	0	0	1.4	0.8	0.571429	64.93	68.89	62.75	50.08	39.07	50.49	51.95	42.18	49.85	48.14	47.51	45.69	47.22	141	103	3342	183	94	690	87	387	8236	-706	205	24
MVZ_016	MVZ	47148	37.8634	-122.215	USA	G	M	29.9	10.4	0.347826	NA	4.7	NA	1.8	1.2	0.666667	1.4	0.8	0.571429	69.2	71.89	66.91	57.36	39.68	51.31	47.44	47.71	53.62	51.36	36.55	47.53	48.06	140	111	3764	189	94	721	86	380	7673	-709	337	18
MVZ_018	MVZ	51974	37.8761	-122.255	USA	G	M	31	8.5	0.274194	NA	NA	NA	1.9	0	0	1.8	0.9	0.5	64.29	71.15	70.12	56.89	46.75	44.29	55.45	51.7	51.98	56.16	46.19	57.09	51.83	140	104	3356	182	101	705	88	348	6933	-806	223	19
MVZ_019	MVZ	97345	37.8788	-122.266	USA	G	M	34.4	9.9	0.287791	NA	5.7	1	1.7	0	0	1.5	1.2	0.8	62.39	72.53	65.39	44.69	30.92	54.18	51.63	23.18	46.27	41.58	25.02	43.74	40.13	141	95	3016	177	103	644	89	327	6543	-806	119	7
MVZ_020	MVZ	98145	37.8905	-122.274	USA	G	F	28.4	7.5	0.264085	NA	3.9	NA	1.5	0	0	1.3	1.1	0.846154	60.42	62.14	60.44	48.52	32.67	48.48	51.45	42.42	49.11	45.8	36.93	45.93	44.59	142	93	2964	177	102	625	88	344	6021	-806	100	3
MVZ_025	MVZ	138994	39.4184	-122.163	USA	H	F	26.3	11.1	0.422053	NA	NA	NA	1.7	0	0	1.2	1.2	1	64.96	70.54	60.65	44.22	29.64	39.54	43.4	32.7	48.14	59.87	33.54	47.66	42.08	159	154	6266	238	81	456	83	246	6861	-1227	25	24
MVZ_026	MVZ	104560	36.9841	-120.534	USA	G	M	30.9	11	0.355987	NA	4.6	NA	1.7	0	0	1.4	0.3	0.214286	61.84	69.17	69.47	61.03	46.3	36.41	40.72	23.7	41	37.05	21.55	25.41	37.02	165	158	6444	246	83	226	82	116	7739	-866	37	18
MVZ_029	MVZ	77023	34.056	-117.182	USA	F	F	29.1	9.8	0.33677	3.3	4.3	0.969697	1.5	0	0	1.2	1.2	1	63.91	67.64	64.78	50.49	35.55	41.77	42.75	32.73	51.9	36.3	32.59	40.84	40.55	178	163	5383	252	115	313	84	166	2999	-821	425	7
MVZ_031	MVZ	21990	38.9633	-95.235	USA	G	M	27.5	9.3	0.338182	3.3	4	1	1.4	1.4	1	1.2	1.2	1	63.12	70.91	70.54	51.39	47.83	52.55	46.46	34.55	43.33	40.05	45.88	38.32	44.48	128	117	9674	248	-1	961	45	93	6226	-888	274	0
MVZ_033	MVZ	114854	40.5105	-96.1637	USA	H	F	27.8	11	0.395683	NA	4	1	1.5	1.5	1	1.3	1.3	1	75.07	77.73	67.5	54.43	37.76	57.3	56.47	36.18	49.26	61.15	42.73	60.12	50.6	107	134	10407	237	-33	819	48	70	7319	-922	329	1
MVZ_034	MVZ	114842	40.8619	-96.6701	USA	H	F	26.7	7.2	0.269663	NA	3.5	NA	1.3	1.3	1	1.2	1.2	1	71.63	75.18	71.41	50.31	48.67	46.57	51.61	35.82	49.26	52.77	38.06	55.39	47.61	107	126	10651	241	-36	749	52	59	5950	-809	347	1
MVZ_035	MVZ	129731	36.0816	-80.2506	USA	G	M	31.1	13.4	0.430868	NA	4.5	NA	1.6	0.7	0.4375	1.2	1.2	1	64.2	81.64	68.89	46.79	27.5	43.13	48.07	39.74	40.08	54.87	46.24	44.67	43.45	147	127	7776	245	44	1134	10	272	6935	-726	245	8
MVZ_036	MVZ	80746	35.903	-98.4843	USA	G	M	25.4	7.7	0.30315	NA	4.3	NA	NA	NA	NA	NA	NA	NA	65.18	77.45	67.95	40.86	33.36	48.54	42.7	35.03	49.05	46.76	38.05	47.87	42.47	150	136	9117	266	30	722	46	75	5485	-1210	466	2
MVZ_037	MVZ	81408	39.4397	-83.8367	USA	H	M	18.1	4.6	0.254144	3.3	3.2	0.969697	1.5	0	0	1.4	1.4	1	63.88	70.58	58.92	53.19	42.99	50.55	47.56	34.61	53.99	51.64	49.04	50.76	48.26	111	109	8962	222	-10	1039	19	212	8279	-865	310	30
MVZ_039	MVZ	31840	38.8822	-77.1714	USA	G	M	28.6	11.9	0.416084	NA	4.72	NA	1.6	1.6	1	1.3	1.3	1	57.45	65.56	56.68	35.72	22.92	33.21	33.99	31.13	38.23	31.59	28.4	41.42	32.96	127	117	8525	235	14	1033	11	224	7901	-634	99	10
MVZ_040	MVZ	14704	37.1041	-76.4641	USA	G	M	29.8	7.3	0.244966	NA	NA	1	1.4	0	0	1.2	1	0.833333	60.89	73.42	60.33	43.18	35.9	34.45	38.69	38.09	40.24	48.41	36.2	61.51	41.85	148	100	7765	246	46	1121	16	261	8120	-799	15	30
MVZ_041	MVZ	14705	37.1041	-76.4641	USA	G	F	27.3	8.3	0.304029	3.2	3.2	1	1.6	0	0	1.3	0.7	0.538462	50.76	73.36	62.16	47.63	36.29	38.72	49.14	38.46	44.34	42.97	37.42	43.11	42.01	148	100	7765	246	46	1121	16	261	8120	-799	15	30
MVZ_043	MVZ	130275	14.3833	-89.1333	SLV	A	F	32.2	17.3	0.537267	NA	4	1	1.3	0.9	0.692308	1	1	1	40.63	60.67	26.14	29.84	38.8	31.68	39.7	35.47	40.88	38.44	39.74	36.62	36.8	132	92	1069	142	120	2359	72	131	8679	-844	2504	74
MVZ_046	MVZ	98152	13.7667	-88.2167	SLV	A	M	38.3	16.1	0.420366	NA	4.5	1	1.6	1.6	1	1.4	1.4	1	45.6	69.25	43.42	37.17	33.55	39.02	45.64	34.9	47.49	39.45	23.94	40.16	37.92	193	113	892	203	184	2222	91	17	8621	-776	1258	68
MVZ_048	MVZ	98155	13.3167	-88.0667	SLV	A	M	33.6	18.7	0.556548	NA	3.7	1	1.6	1.6	1	1.4	1.4	1	47.56	72.15	38.47	42.91	31.77	40.6	55.81	39.5	39.94	48.44	33.79	44.5	41.92	258	116	748	268	256	1831	99	346	8804	-897	253	0
MVZ_050	MVZ	130298	13.3167	-88.0667	SLV	A	F	33.7	15.6	0.462908	4.4	4.4	1	1.6	1.6	1	1.2	1.2	1	39.86	62.35	33.21	31.49	20.39	30.81	31.84	25.25	28.13	35	23.38	25.01	27.92	258	116	748	268	256	1831	99	346	8804	-897	253	0
MVZ_051	MVZ	130299	13.3167	-88.0667	SLV	A	F	40.2	19.3	0.4801	3.4	3.4	1	1.7	0.4	0.235294	1.5	1.5	1	51.65	69.18	48.97	47.34	33.55	43.76	49.09	31.76	54.95	34	26.14	38.68	39.92	258	116	748	268	256	1831	99	346	8804	-897	253	0
MVZ_052	MVZ	130302	13.3167	-88.0667	SLV	A	M	37.4	20.5	0.548128	3.2	3.2	1	1.6	1.6	1	1.2	1.2	1	54.34	71.68	49.45	43.11	38.17	38.87	38.57	30.49	41.49	41.91	30.96	40.38	38.22	258	116	748	268	256	1831	99	346	8804	-897	253	0
MVZ_053	MVZ	130310	13.2333	-88.3667	SLV	A	M	33.4	19.2	0.57485	NA	3.5	NA	1.4	1.4	1	1.1	1.1	1	51.22	68.77	40.88	44.62	43.78	38.83	52.63	46.9	45.73	49.07	30.49	49.57	44.62	261	114	782	272	254	1764	98	337	9155	-833	18	65
MVZ_054	MVZ	130311	13.2333	-88.3667	SLV	A	F	36.4	21.8	0.598901	NA	4.5	1	1.5	1.5	1	1.3	1.3	1	50.86	65.94	28.7	41.8	25.89	31.38	49	30.5	54.84	40.77	28.07	42.62	38.32	261	114	782	272	254	1764	98	337	9155	-833	18	65
USNM_005	USNM	76717	15.8013	-91.7528	GUA	B	F	34	19	0.558824	NA	NA	1	1.6	1.6	1	1.4	1.4	1	46.61	58.35	42.14	36.32	32.29	38.19	38.65	35.16	32.45	35.8	39.42	33.28	35.73	228	135	1108	240	213	1611	89	113	7874	-871	840	32
USNM_006	USNM	275678	13.9753	-91.0565	GUA	A	M	NA	NA	NA	NA	NA	1	1.3	1.3	1	1.3	1.3	1	39.02	66.93	33.83	49.13	43.81	47.27	50.84	33.38	45.77	41.63	36.98	38.47	43.03	275	107	760	285	266	1599	89	8	9441	-937	9	24
USNM_007	USNM	19463	15.5013	-88.0286	HON	B	F	37.6	21.8	0.579787	NA	4.2	1	1.4	1.4	1	1.3	1.3	1	38	56.16	31.54	57.41	26.81	48.7	42.05	33.52	38.11	37.42	28.61	44.18	39.65	264	103	1472	278	242	1382	38	293	4084	-670	98	0
USNM_008	USNM	148748	15.4324	-88.0112	HON	B	M	NA	NA	NA	NA	4.1	1	1.3	1.3	1	1.1	1.1	1	38.19	72.76	31.82	43.32	39.4	47.29	47.54	50.45	59.72	32.2	31.45	33.07	42.72	267	104	1421	281	246	1489	37	328	7232	-782	46	3
USNM_010	USNM	181261	18.4493	-90.1065	MEX	B	M	36.4	22.8	0.626374	NA	NA	1	1.4	1.4	1	1.3	1.3	1	40.11	63.26	35.3	44.3	28.47	40.72	52.77	32.17	47.5	51.2	31.54	36.54	40.58	253	121	2172	276	224	1204	66	120	9616	-819	202	81
USNM_011	USNM	181262	18.4493	-90.1065	MEX	B	M	28.3	14.5	0.512367	NA	NA	1	1.3	1.3	1	1.1	1.1	1	40.13	68.85	39.85	37.12	41.45	31.44	55.94	39.56	52.06	48.18	33.4	40.78	42.21	253	121	2172	276	224	1204	66	120	9616	-819	202	81
USNM_012	USNM	76202	16.7633	-93.3643	MEX	B	F	32.6	16.5	0.506135	NA	NA	NA	1.2	NA	NA	1.1	NA	NA	36.69	68.6	38.07	36.06	36.03	48.5	32.82	28.08	30.74	27.5	34.01	30.22	33.77	226	125	1601	243	209	962	91	35	8212	-867	989	27
USNM_013	USNM	76203	16.8593	-93.4122	MEX	B	M	33.5	16.7	0.498507	NA	4.4	1	1.5	1.5	1	1.3	1.3	1	26.64	59.17	25.66	35.21	35.08	39.98	38.35	32.89	39.69	36.95	27.19	47.32	36.96	228	120	1707	245	204	914	83	57	7551	-794	922	34
USNM_014	USNM	76209	16.7284	-92.6271	MEX	B	F	32	17.9	0.559375	NA	NA	NA	1.3	0.4	0.307692	1.2	1.2	1	36.72	64.74	34.9	48.05	29.51	50.09	37.27	36.18	29.79	34.5	36.92	37.71	37.78	151	130	1198	162	133	1208	72	75	6884	-813	2148	3
USNM_015	USNM	76211	17.2801	-92.3142	MEX	B	M	39.1	21.2	0.542199	NA	NA	1	1.5	1.5	1	1.3	1.3	1	34.17	58.27	35.1	52.82	31.93	45.19	39.69	33.35	45.72	39.67	29.93	34.33	39.18	199	118	1378	211	173	3519	55	521	8866	-721	1399	26
USNM_016	USNM	76213	17.2801	-92.3142	MEX	B	F	35.1	NA	NA	NA	3.8	NA	1.5	NA	NA	1.2	NA	NA	38.42	60.21	28.4	37.42	23.59	25.47	34.28	30.16	34.72	32.55	21.96	25.98	29.57	199	118	1378	211	173	3519	55	521	8866	-721	1399	26
USNM_017	USNM	76214	17.2801	-92.3142	MEX	B	M	35.3	18.5	0.524079	NA	NA	NA	1.6	1.6	1	1	1	1	25.22	62.85	25.27	40.97	37.28	34.17	37.14	36.63	41.16	43.99	30.01	38.19	37.73	199	118	1378	211	173	3519	55	521	8866	-721	1399	26
USNM_018	USNM	76716	16.2044	-92.088	MEX	B	M	27.7	18.1	0.65343	NA	NA	1	1.3	1.3	1	1	1	1	37.24	48.71	31.32	47.81	28.45	48.41	33.79	28.76	41.89	32.64	28.85	32.84	35.94	186	139	1209	199	169	1006	86	34	7117	-922	1589	14
USNM_019	USNM	78001	15.0159	-92.3932	MEX	B	M	38.4	21.7	0.565104	NA	NA	1	1.6	1.6	1	1.3	1.3	1	38.71	66.53	34.4	26.81	24.67	32.69	43.35	32.57	39.83	24.6	25.32	23.86	30.41	274	131	768	285	264	2496	85	125	8201	-768	56	24
USNM_020	USNM	133187	16.3474	-92.5492	MEX	B	M	34.6	21.4	0.618497	NA	NA	1	1.4	1.4	1	1.1	1.1	1	44.07	66.95	37.73	43.68	47.23	42.42	47.22	36.99	50.86	45.27	32.73	50.54	44.1	236	149	1363	253	211	1374	97	36	6951	-858	794	16
USNM_022	USNM	32635	19.0526	-104.32	MEX	C	F	33.8	17.8	0.526627	NA	NA	1	1.3	1.3	1	1.1	1.1	1	41.97	61.92	33.22	47.92	21.14	42.14	43.72	23.22	49.29	37.29	21.29	44.22	36.69	265	111	1609	283	244	987	113	32	5547	-917	44	54
USNM_023	USNM	32636	19.0526	-104.32	MEX	C	M	40.2	17.5	0.435323	NA	3.6	1	1.5	1.5	1	1.3	1.3	1	34.88	65.6	29	44.19	24.6	34.29	37.57	20.23	35.06	45.87	19.25	35.84	32.99	265	111	1609	283	244	987	113	32	5547	-917	44	54
USNM_024	USNM	32637	19.0526	-104.32	MEX	C	M	40	16.9	0.4225	NA	NA	1	1.6	1.6	1	1.4	1.4	1	37.42	57.21	40.12	45.15	24.39	45.09	42.75	27.3	47.03	40.54	29.76	59.07	40.12	265	111	1609	283	244	987	113	32	5547	-917	44	54
USNM_026	USNM	32639	19.0526	-104.32	MEX	C	F	36.6	20.8	0.568306	NA	4.6	1	1.3	1.3	1	1.1	1.1	1	32.09	53.01	42.66	43.74	20.94	45.7	42.5	20.38	34.39	42.71	19.78	25.66	32.87	265	111	1609	283	244	987	113	32	5547	-917	44	54
USNM_028	USNM	32645	19.0526	-104.32	MEX	C	M	34.9	20	0.573066	NA	NA	1	1.4	1.4	1	1.2	1.2	1	48.24	69	37.52	44.43	21.89	24.95	40.87	25.66	44.64	42.52	20.44	31.28	32.96	265	111	1609	283	244	987	113	32	5547	-917	44	54
USNM_029	USNM	32646	19.0526	-104.32	MEX	C	F	32.5	19.1	0.587692	NA	NA	NA	1.3	1.3	1	1.1	1.1	1	40.39	60.07	41.5	35.65	19.25	42.55	41.04	21.64	43.13	31.86	19.14	34.99	32.14	265	111	1609	283	244	987	113	32	5547	-917	44	54
USNM_030	USNM	33226	19.0526	-104.32	MEX	C	M	37.1	19.6	0.528302	NA	NA	1	NA	NA	1	1.2	1.2	1	44.32	57.93	40.93	33.49	18.77	32.95	30.59	23.36	46.88	31.77	19.95	34.87	30.29	265	111	1609	283	244	987	113	32	5547	-917	44	54
USNM_031	USNM	33264	18.9405	-103.96	MEX	B	F	37.8	23.1	0.611111	NA	4.3	1	1.4	1.4	1	1.2	1.2	1	47.74	62.47	47.51	56.47	47.99	47.2	56.58	40.11	62.53	59.78	46.5	51.27	52.05	264	127	1750	284	241	762	102	29	7255	-869	46	8
USNM_032	USNM	33265	18.9405	-103.96	MEX	B	M	45.5	22.2	0.487912	NA	NA	1	1.6	1.6	1	1.2	1.2	1	32.08	62.03	32.1	37.32	28.31	46.36	55.18	26.81	55.35	38.8	27.22	45.29	40.07	264	127	1750	284	241	762	102	29	7255	-869	46	8
USNM_033	USNM	33266	18.9405	-103.96	MEX	B	F	40.8	21.2	0.519608	NA	NA	1	1.4	1.4	1	1.1	1.1	1	37.77	65.9	37.31	33.85	31.65	41.87	32.33	24.18	42.62	43.1	22.54	29.55	33.52	264	127	1750	284	241	762	102	29	7255	-869	46	8
USNM_035	USNM	33268	18.9405	-103.96	MEX	B	M	41.3	21.1	0.510896	NA	4.3	1	1.6	1.6	1	1.3	1.3	1	39.14	56.87	36.65	34.67	19.88	44.15	36.78	20.69	45.24	47.69	19.43	47.15	35.08	264	127	1750	284	241	762	102	29	7255	-869	46	8
USNM_036	USNM	96819	24.8123	-106.739	MEX	D	M	38	20.5	0.539474	NA	NA	1	1.6	1.6	1	1.4	1.4	1	32.92	61.52	34.63	31.8	23.99	34.57	60.35	20.58	58.05	44.25	22.73	43.41	37.75	239	154	3359	276	193	1063	109	110	8448	-766	633	31
USNM_037	USNM	70617	16.8831	-99.8879	MEX	B	M	32.5	24.1	0.741538	NA	NA	1	1.6	1.6	1	1.2	1.2	1	34.88	58.68	30.78	46.91	31.81	43.58	43.3	22.19	54.5	36.67	18.9	33.89	36.86	277	115	704	285	261	1140	111	21	6752	-806	271	16
USNM_038	USNM	70618	16.8831	-99.8879	MEX	B	F	37.1	20.7	0.557951	NA	NA	1	1.5	1.5	1	1.2	1.2	1	39.81	54.62	37.74	48.77	44.57	33.21	43.81	22.86	41.23	41.16	19.15	44.73	37.72	277	115	704	285	261	1140	111	21	6752	-806	271	16
USNM_039	USNM	70619	16.8831	-99.8879	MEX	B	M	33.9	18.6	0.548673	NA	3.9	1	NA	NA	1	1.1	1.1	1	42.8	55.59	40.42	52.09	52.31	46.5	39.39	57.1	45.4	64.56	34.28	44.99	48.51	277	115	704	285	261	1140	111	21	6752	-806	271	16
USNM_041	USNM	126715	18.0781	-101.991	MEX	B	F	34.2	17.4	0.508772	NA	NA	1	1.2	1.2	1	1.1	1.1	1	50.83	64.67	42.15	57.48	42.39	52.12	48.65	36.9	50.19	42.43	4.03	56.78	43.44	273	132	1167	285	257	950	107	31	7837	-875	127	20
USNM_042	USNM	26418	20.1318	-98.7407	MEX	C	M	31.3	13.9	0.444089	NA	NA	1	1.5	1.5	1	1.2	1.2	1	36.97	61.29	33.39	40.71	40.32	35.01	37.11	38.13	45.35	44.37	34.54	35.92	39.05	140	137	1672	161	107	615	71	65	1968	-887	2460	2
USNM_043	USNM	26419	20.1318	-98.7407	MEX	C	F	35.1	19.1	0.54416	NA	NA	1	1.3	1.3	1	1.2	1.2	1	43.41	51.75	35.35	38.14	42.3	47.7	32.1	39.59	50.65	38.81	43.57	30.96	40.42	140	137	1672	161	107	615	71	65	1968	-887	2460	2
USNM_044	USNM	26420	20.1382	-98.6736	MEX	C	M	32.5	15.8	0.486154	NA	NA	1	1.2	1.2	1	1.2	1.2	1	42.22	54.07	39.27	39.01	29.59	33.03	35.24	30.62	30.31	32.5	39.17	28.41	33.1	121	128	1561	140	97	870	68	73	4630	-944	2746	1
USNM_045	USNM	81726	20.4893	-99.2142	MEX	C	M	33.5	19.9	0.59403	NA	NA	1	1.3	1.3	1	1.1	1.1	1	45.97	76.6	41.52	51.46	28.94	57.01	50.65	44.5	48.72	59.29	44.23	50.94	48.42	183	173	2479	209	149	386	70	31	3899	-970	1705	1
USNM_046	USNM	33517	19.7047	-103.447	MEX	C	F	35	20.3	0.58	NA	5	1	1.3	1.3	1	1.2	1.2	1	40.87	58.84	40.64	51.71	36.2	41.03	37.96	33.57	53.46	37.49	28.64	39.77	39.98	180	149	1918	201	164	776	97	47	8249	-820	1700	28
USNM_047	USNM	34338	20.7187	-103.365	MEX	C	F	38.5	19.1	0.496104	NA	3.9	1	NA	NA	1	1.4	1.4	1	46.33	65.08	39.95	41.35	37.81	37.73	38.45	41.09	39.64	46.37	38.02	52.15	41.4	196	163	2431	224	161	952	111	39	3350	-491	1533	1
USNM_048	USNM	34339	20.7187	-103.365	MEX	C	M	34.6	19.1	0.552023	NA	3.5	1	NA	NA	1	1.2	1.2	1	45.33	69.16	47.83	40.2	35.9	51.09	48.67	36.39	53.06	47.78	39.99	45.43	44.28	196	163	2431	224	161	952	111	39	3350	-491	1533	1
USNM_050	USNM	88142	20.7619	-104.85	MEX	C	F	34.6	20.7	0.598266	NA	NA	1	1.4	1.4	1	1.2	1.2	1	35.08	62.89	28.79	29.84	26.13	26.1	37.07	32.07	31.8	23.9	38.64	46.27	32.42	185	147	1944	205	163	1286	110	57	7809	-791	1480	36
USNM_053	USNM	51506	19.1158	-98.7602	MEX	C	M	37.1	30.2	0.814016	NA	5.1	1	NA	NA	1	1.4	1.4	1	41.73	62.37	36.64	45.21	30.64	55.95	34.29	29.93	31.11	45.49	37.52	38.6	38.75	142	162	1610	160	119	947	93	26	8447	-845	2492	15
USNM_054	USNM	20443	20.2799	-102.474	MEX	C	F	33.6	20.5	0.610119	NA	NA	NA	1.4	NA	NA	1.2	1.2	1	44.18	64.72	45.03	57.17	46.56	56.97	57.22	42.82	58.87	51.32	39.88	51.47	51.36	199	156	2396	225	164	787	109	31	8005	-864	1534	16
USNM_055	USNM	35526	19.8062	-100.891	MEX	C	F	35.6	22.1	0.620787	NA	NA	1	1.5	1.5	1	1.1	1.1	1	38.44	57.97	28.9	54.27	29.61	40.67	41.96	36.97	44.58	42.39	33.81	50.03	41.59	175	158	2204	201	147	748	102	30	7302	-882	1904	13
USNM_056	USNM	35527	19.8062	-100.891	MEX	C	F	32.9	17.9	0.544073	NA	NA	1	1.4	1.4	1	1.1	1.1	1	38.77	57.85	33.7	48.91	29.29	33.84	47.62	23.53	32.01	44.66	24.83	36.61	35.7	175	158	2204	201	147	748	102	30	7302	-882	1904	13
USNM_057	USNM	35528	19.8062	-100.891	MEX	C	M	40.2	21.2	0.527363	NA	NA	1	1.5	1.5	1	1.2	1.2	1	41.42	65.23	45.35	44.7	25.78	41.23	54.11	27.74	44.49	33.17	30.64	39.78	37.96	175	158	2204	201	147	748	102	30	7302	-882	1904	13
USNM_059	USNM	126167	19.0578	-101.607	MEX	C	M	32.4	24.1	0.743827	NA	NA	1	1.7	1.7	1	1.3	1.3	1	38.11	68.12	50.07	48.47	26.94	58.13	49.18	36.93	50.29	29.33	21.72	44.12	40.57	201	155	1463	221	172	1184	110	33	8264	-906	1552	48
USNM_060	USNM	51125	18.8786	-99.0589	MEX	B	F	31	20.1	0.648387	NA	3.8	1	NA	NA	1	1.1	1.1	1	45.1	64.78	35.13	42.97	36.43	35.42	38.09	31.45	49.02	39.66	35.69	37.16	38.43	233	166	1776	256	209	926	100	35	7381	-781	1217	5
USNM_061	USNM	25558	25.7189	-100.405	MEX	D	F	35.7	21.4	0.59944	NA	NA	NA	NA	NA	1	1.2	1.2	1	51.68	64.98	44.37	52.65	29.93	29.26	40.49	32.54	38.15	33.48	31.27	37.06	36.09	199	125	4936	257	129	402	85	35	5737	-625	889	3
USNM_064	USNM	25735	25.7189	-100.405	MEX	D	M	33.8	17.6	0.52071	NA	NA	1	1.4	1.4	1	1.1	1.1	1	37.63	64.74	40.84	39.8	22.01	30.44	36.86	19.63	39.63	41.91	18.9	40.65	32.2	199	125	4936	257	129	402	85	35	5737	-625	889	3
USNM_065	USNM	88143	21.5031	-104.898	MEX	C	F	30.5	15.6	0.511475	NA	NA	1	1.2	1.2	1	1	1	1	41.58	66.39	35.08	33.69	36.02	48.55	50.25	30.68	44.38	37.92	43.69	36.16	40.15	213	143	2284	238	181	1289	119	59	3148	-666	942	2
USNM_066	USNM	91169	22.501	-105.363	MEX	C	F	34.4	18.4	0.534884	NA	NA	1	1.2	1.2	1	1	1	1	43.78	57.09	36.4	47.04	26.19	45.87	51.59	30.5	43.6	47.94	25.28	45.79	40.42	248	118	2641	277	212	1337	121	68	7936	-857	30	10
USNM_068	USNM	512183	20.7978	-105.221	MEX	C	F	33.1	16.5	0.498489	3.5	3.5	1	1.3	1.3	1	1.1	1.1	1	50.61	69.78	40.49	54.43	33.91	37.13	44.26	30.2	44.13	33.99	41.35	42.11	40.17	257	125	2415	284	225	1166	118	37	8039	-814	33	10
USNM_070	USNM	523002	21.1668	-105.227	MEX	C	M	35.7	16.3	0.456583	4.2	4.2	1	1.4	1.4	1	1.2	1.2	1	44.11	68.03	44.91	63.5	33.08	56.19	54.78	36.66	60.15	50.38	41.78	42.77	48.81	257	120	2635	287	222	1401	124	43	9418	-1418	15	13
USNM_071	USNM	523003	21.1668	-105.227	MEX	C	M	34.3	12.7	0.370262	4.2	4.11	0.978571	1.4	1.4	1	1.2	1.2	1	39.33	73.09	36.77	46.38	36.26	42.08	47.58	33.31	41.74	38.08	35.02	46.11	40.73	257	120	2635	287	222	1401	124	43	9418	-1418	15	13
USNM_072	USNM	553883	21.3849	-105.191	MEX	C	M	40.6	20.6	0.507389	4.2	4.2	1	1.6	1.6	1	1.4	1.4	1	45.71	68.59	49.78	54.95	25.4	55.35	47.27	25.7	51.85	59.24	22.31	49.78	43.54	255	117	2757	286	219	1555	125	42	8679	-915	51	67
USNM_073	USNM	65954	18.0905	-96.1318	MEX	B	M	37.4	16.6	0.44385	3.2	3.2	1	1.5	1.5	1	1.3	1.3	1	46.68	64.75	41.77	47.16	24.43	33.17	42.47	32.56	51.2	43.42	27.57	39.1	37.9	252	98	2393	278	219	2375	92	133	5357	-782	31	6
USNM_074	USNM	65955	18.0905	-96.1318	MEX	B	F	NA	NA	NA	3	3	1	1.4	1.4	1	1.2	1.2	1	41.07	53.62	34.85	29.64	34.95	32.38	33.66	33.03	40.19	33.3	31.66	38.66	34.16	252	98	2393	278	219	2375	92	133	5357	-782	31	6
USNM_075	USNM	69798	17.7984	-96.9627	MEX	B	F	40	26.7	0.6675	4	4	1	1.3	1.3	1	1.1	1.1	1	45.44	62.7	41.57	44.8	36.67	50.89	42.2	38.18	42.21	45.85	27.16	45.92	41.54	251	137	2370	280	214	500	103	12	6863	-882	611	10
USNM_076	USNM	73490	16.3187	-95.2409	MEX	B	M	41.8	18.9	0.452153	3.6	3.6	1	1.7	1.7	1	1.4	1.4	1	50.85	64.18	41.64	53.87	37.51	49.21	52.68	26.11	36.19	42.31	24.52	47.42	41.09	276	108	1359	290	256	860	114	10	5139	-920	42	2
USNM_077	USNM	73491	16.9613	-95.0964	MEX	B	F	36.8	21.2	0.576087	4.1	4.1	1	1.4	1.4	1	1.2	1.2	1	38.93	56.97	28.36	41.22	28.28	43.12	36.29	24.4	42.28	32.68	19	32.84	33.35	244	107	1715	265	219	1594	89	109	7785	-786	260	36
USNM_078	USNM	73492	16.3187	-95.2409	MEX	B	M	35.8	21.6	0.603352	3.9	3.9	1	1.2	1.2	1	1.1	1.1	1	44.89	67.99	31.79	55.6	36.8	58.02	55.24	40.78	56.27	51.95	35.03	50.51	48.91	276	108	1359	290	256	860	114	10	5139	-920	42	2
USNM_080	USNM	55579	19.2874	-98.4306	MEX	C	F	33.8	18.9	0.559172	3.5	3.5	1	1.3	1.3	1	1.2	1.2	1	43.16	65.43	41.41	48.58	34.8	35.55	57.56	37.47	62.39	51.79	33.72	49.01	45.65	155	161	1867	175	127	698	86	22	4036	-849	2248	2
USNM_081	USNM	92978	20.7369	-97.8519	MEX	C	M	39.8	20.2	0.507538	3.9	3.9	1	1.4	1.4	1	1.1	1.1	1	43.15	61.22	40.61	38.48	25.83	48.32	43.12	39.26	44.12	43.04	31.21	47.1	40.05	234	112	3257	267	187	1616	65	147	8250	-800	316	20
USNM_083	USNM	96225	27.2025	-107.712	MEX	E	F	31.8	15.9	0.5	3.1	3.1	1	1.2	1.2	1	1	1	1	50.19	60.37	42.88	36.05	36.35	42.31	53.83	36.98	49.82	47.87	46.59	50.83	44.51	169	180	4280	221	113	968	99	128	7395	-914	1577	24
USNM_084	USNM	96820	24.7907	-107.387	MEX	D	M	39.7	22.5	0.566751	3.7	3.7	1	1.5	1.5	1	1.3	1.3	1	36.79	67.62	32.58	36.19	23.79	37	56.68	22.4	36.93	48.02	25	51.84	37.54	252	155	3832	296	203	661	116	63	4089	-694	112	2
USNM_085	USNM	96821	23.2697	-106.433	MEX	D	F	39.1	19.2	0.491049	3.2	3.2	1	1.5	1.5	1	1.1	1.1	1	55.59	64.91	50.52	43.42	32.44	46.8	64.61	32.71	62.07	50.93	30.04	50.57	45.95	247	97	3175	283	207	785	121	40	7005	-957	15	8
USNM_086	USNM	98077	22.8352	-105.787	MEX	C	F	38.2	26.1	0.683246	5.1	5.1	1	1.4	1.4	1	1.2	1.2	1	40.88	58.77	31.8	31.5	22.68	41.12	23.28	20.9	30.98	21.07	20.12	22.46	26.01	250	108	3035	284	209	864	93	68	4975	-938	21	12
USNM_087	USNM	33705	29.079	-110.947	MEX	E	F	44.1	26.3	0.596372	4.7	4.7	1	1.7	1.7	1	1.4	1.4	1	47.39	62.81	44.51	38.29	28.49	45.02	42.21	22.97	46.51	35.11	22.16	39.07	35.54	242	157	5870	314	167	284	114	50	2768	-771	211	1
USNM_088	USNM	100509	17.5588	-92.9439	MEX	B	F	32.4	19.6	0.604938	3.7	3.7	1	1.4	1.4	1	1.2	1.2	1	26.64	63.38	38.41	41.32	34.76	35.8	36.29	37.17	48.95	43.91	37.86	46.56	40.29	259	115	1983	278	230	3614	44	756	6071	-682	41	9
USNM_089	USNM	100511	17.5588	-92.9439	MEX	B	M	39.2	15	0.382653	3.5	3.5	1	1.4	1.4	1	1.2	1.2	1	41.28	53.79	47.74	48.3	31.72	37.17	46.02	35.41	46.61	48.26	25.16	60.75	42.16	259	115	1983	278	230	3614	44	756	6071	-682	41	9
USNM_093	USNM	92963	22.4003	-97.9351	MEX	C	M	42.9	19.4	0.452214	4	4	1	1.5	1.5	1	1.2	1.2	1	63.88	60.6	59.1	49.38	37.28	43.02	51.03	39.92	53.2	51.6	36.78	55.79	46.44	239	86	3366	275	191	1002	91	77	6219	-962	16	11
USNM_094	USNM	92964	22.4003	-97.9351	MEX	C	F	36.1	20.3	0.562327	4.7	4.7	1	1.5	1.5	1	1.2	1.2	1	42.31	57.18	32.34	46.56	31.2	47.42	50.98	29.11	50.7	34.63	23.04	36.89	38.95	239	86	3366	275	191	1002	91	77	6219	-962	16	11
USNM_095	USNM	94092	22.4003	-97.9351	MEX	C	M	35.6	16.2	0.455056	4	4	1	1.6	1.6	1	1.2	1.2	1	45.85	63.81	40.36	50.71	39.91	48.91	53.26	29.26	47.37	36.56	33.38	32.29	41.29	239	86	3366	275	191	1002	91	77	6219	-962	16	11
USNM_096	USNM	7846	18.8552	-97.0913	MEX	B	M	34.5	16.4	0.475362	NA	4.52	NA	1.5	1.5	1	1.3	1.3	1	40.69	61.18	43.5	30.68	20.4	35.04	27.31	24.93	30.59	27.68	26.7	25.19	27.61	195	115	1943	216	168	2061	82	127	4785	-633	1218	1
USNM_097	USNM	54989	19.4172	-97.0073	MEX	C	M	41.1	20.2	0.491484	4.5	4.5	1	1.7	1.2	0.705882	1.5	1.5	1	49.06	65.96	35.48	50.64	22.23	52.6	46.9	21.57	31.34	53.23	20.96	39.51	37.66	188	103	2089	210	157	1875	69	168	8042	-702	1295	27
USNM_099	USNM	65956	18.429	-95.1171	MEX	B	M	38.9	18.8	0.48329	3.3	3.3	1	1.5	1	0.666667	1.2	1.2	1	36.2	61.61	24.08	41.4	21.62	22.32	39.78	25.25	32.84	52.53	25.86	44.33	33.99	236	92	2180	261	206	2306	72	255	7155	-848	396	34
USNM_100	USNM	78123	17.9842	-94.5501	MEX	B	M	34.8	22.5	0.646552	3.5	3.5	1	1.3	1.3	1	1.3	1.3	1	40.36	70.76	38.79	43.21	35.81	44.44	44.51	37.93	43.07	43.59	47.31	40.5	42.26	260	94	2108	283	230	2410	68	320	4627	-733	21	6
USNM_101	USNM	90988	22.6424	-104.102	MEX	C	M	37.8	22.9	0.60582	3.4	3.4	1	1.6	1.6	1	1.1	1.1	1	42.83	70.38	47.27	38.95	29.52	44.18	43.04	35.04	44.1	44.71	35.83	44.67	40	215	158	3300	251	168	493	100	51	4621	-930	1221	1
USNM_103	USNM	332425	12.276	-86.3659	NIC	A	M	39.5	19.4	0.491139	3.6	3.6	1	1.5	1.5	1	1.1	1.1	1	31.65	70.6	43.9	37.51	31.21	30.35	34.32	22.05	42.05	26.4	17.86	34.87	30.74	275	104	935	288	264	1116	104	321	NA	NA	NA	NA
USNM_104	USNM	332426	12.276	-86.3659	NIC	A	M	37.9	20.1	0.530343	3.7	3.7	1	1.4	0.2	0.142857	1.2	1.2	1	48.59	70.23	40.84	30.04	32.88	44.85	44.05	44.74	53.83	39.21	38.37	45.04	41.45	275	104	935	288	264	1116	104	321	NA	NA	NA	NA
USNM_105	USNM	332427	12.276	-86.3659		A	F	44.6	23.5	0.526906	4.2	3.8	0.904762	1.4	0.8	0.571429	1.2	1.2	1	34.52	50.21	31.91	35.49	39.99	51.71	43.59	39.08	48.29	38.94	52.05	41.42	43.4	275	104	935	288	264	1116	104	321	NA	NA	NA	NA
USNM_106	USNM	332429	12.276	-86.3659	NIC	A	M	39	19.8	0.507692	4.5	4.5	1	1.6	1.6	1	1.3	1.3	1	31.94	59.81	31.06	54.12	47.79	45.12	49.91	27.17	38.04	32.78	28.81	34.55	39.81	275	104	935	288	264	1116	104	321	NA	NA	NA	NA
USNM_107	USNM	332430	12.276	-86.3659	NIC	A	F	36.6	19.4	0.530055	3.8	3.8	1	1.3	1.3	1	1.1	1.1	1	49.71	56.74	36.87	49.78	42.38	36.11	41.59	33.56	39.47	31.98	31.3	36.27	38.05	275	104	935	288	264	1116	104	321	NA	NA	NA	NA
USNM_108	USNM	332431	12.276	-86.3659	NIC	A	M	40.4	20.9	0.517327	3.4	3.2	0.941176	1.5	0.3	0.2	1.2	1.2	1	34.13	65.53	32.52	43.37	35.43	37.06	48.5	32.26	48.49	54.15	28.18	36.01	40.38	275	104	935	288	264	1116	104	321	NA	NA	NA	NA
USNM_109	USNM	332432	12.276	-86.3659	NIC	A	F	37.5	22.4	0.597333	NA	4.1	1	1.4	1.4	1	1.1	1.1	1	49.78	57.23	42.35	42.87	34.08	41.66	54.15	37.32	49.36	52.71	36.64	43.7	43.61	275	104	935	288	264	1116	104	321	NA	NA	NA	NA
USNM_110	USNM	332433	12.276	-86.3659	NIC	A	M	39.9	21.2	0.531328	NA	4.6	NA	1.5	1.5	1	1.1	1.1	1	48.15	59.3	40.1	35.82	37.2	44.06	35.9	26.17	45.06	37.93	20.61	35.95	35.41	275	104	935	288	264	1116	104	321	NA	NA	NA	NA
USNM_111	USNM	332434	12.276	-86.3659	NIC	A	F	42.4	24.6	0.580189	NA	4.9	1	NA	NA	NA	NA	NA	NA	39.87	55.1	34.2	24.43	24.39	40.64	21.41	19.43	32.61	25.03	20	24.85	25.87	275	104	935	288	264	1116	104	321	NA	NA	NA	NA
USNM_112	USNM	334580	12.276	-86.3659	NIC	A	M	40.2	20.2	0.502488	NA	5.1	1	1.5	1.5	1	1.2	1.2	1	52.45	65.46	41.32	59.77	56.59	53.05	55.72	42.55	56.52	52.4	44.35	53.7	52.74	275	104	935	288	264	1116	104	321	NA	NA	NA	NA
USNM_113	USNM	334581	12.276	-86.3659	NIC	A	F	38.6	23.4	0.606218	NA	4.9	1	1.5	1.5	1	1.3	1.3	1	57.77	57.36	43.9	48.36	35.15	42.25	46.46	37.63	48.05	43.3	27.66	34.41	40.36	275	104	935	288	264	1116	104	321	NA	NA	NA	NA
USNM_114	USNM	334582	12.4172	-86.6451	NIC	A	F	39.3	22.9	0.582697	NA	4.8	NA	1.2	1.2	1	1	1	1	46.63	58.49	38.9	42.58	28.88	44.36	38.2	39.78	51.8	34.09	36.81	26.66	38.13	268	109	871	280	258	1390	107	68	NA	NA	NA	NA
USNM_116	USNM	337522	12.5503	-87.1661	NIC	A	F	36.1	23.2	0.642659	3.5	3.5	1	1.2	1.2	1	0.9	0.9	1	44.6	61.23	26.94	42.3	28.7	35.74	50.84	27.72	40.83	32.67	31.88	42.57	37.03	274	114	933	286	262	1626	97	91	NA	NA	NA	NA
USNM_118	USNM	337525	12.5503	-87.1661	NIC	A	F	39.1	24.1	0.616368	2.9	2.9	1	1.2	0.9	0.75	0.9	0.9	1	35.76	65.8	36.81	24.82	29.28	31.35	40.36	34.02	26.21	43.7	18.96	38.19	31.88	274	114	933	286	262	1626	97	91	NA	NA	NA	NA
USNM_119	USNM	337526	12.5503	-87.1661	NIC	A	F	27.6	22.6	0.818841	3.8	3.8	1	1.4	1.4	1	1.1	1.1	1	35.81	66.01	46.74	45.41	24.28	52.6	42.7	44.27	49.2	46.29	31.1	32.54	40.93	274	114	933	286	262	1626	97	91	NA	NA	NA	NA
USNM_120	USNM	337531	13.0188	-85.8355	NIC	A	F	34.6	22.7	0.656069	3.8	3.8	1	1.2	1.2	1	0.9	0.9	1	34.02	64.04	22.39	43.04	32.57	38.74	38.14	42.63	43.56	29.55	31.05	28.92	36.47	202	101	871	212	190	1808	62	277	9160	-692	1029	31
USNM_121	USNM	337653	12.4172	-86.6451	NIC	A	F	35.2	21.2	0.602273	3.4	3.2	0.941176	1.3	1.3	1	1.1	1.1	1	46.51	60.66	37.44	52.24	32.62	43.39	36.45	29.22	47.89	44.21	34.24	38	39.81	268	109	871	280	258	1390	107	68	NA	NA	NA	NA
USNM_122	USNM	337654	12.4172	-86.6451	NIC	A	M	40.1	20.3	0.506234	NA	3.7	1	1.4	1.4	1	1	1	1	45.31	73.76	35.68	46.4	35.29	48.76	50.54	43.73	42.94	42.69	31.04	43.92	42.81	268	109	871	280	258	1390	107	68	NA	NA	NA	NA
USNM_123	USNM	337841	11.3247	-85.7074	NIC	A	F	33.9	17	0.501475	NA	NA	1	1.2	0.8	0.666667	1	1	1	45.76	49.44	41.25	37.47	25.05	42.01	37.6	27.85	36.41	36.87	26.46	36.04	33.97	265	102	792	277	256	1646	80	492	NA	NA	NA	NA
USNM_124	USNM	337842	11.3247	-85.7074	NIC	A	M	40.7	23.4	0.574939	3.1	3.1	1	1.4	0.8	0.571429	1.2	1.2	1	44.15	67.09	30.71	44.53	31.05	50.79	47.37	30.67	37.35	41.13	29.35	42.99	39.47	265	102	792	277	256	1646	80	492	NA	NA	NA	NA
USNM_125	USNM	337843	11.3247	-85.7074	NIC	A	M	34.6	21	0.606936	NA	3.7	1	1.2	0.6	0.5	0.9	0.9	1	35.15	66.46	35.32	48.6	32.01	37.73	43.93	35.19	43.87	36.35	32.88	42.24	39.2	265	102	792	277	256	1646	80	492	NA	NA	NA	NA
USNM_126	USNM	337846	11.3247	-85.7074	NIC	A	F	30.8	27	0.876623	3.7	3.7	1	1.2	1.2	1	1	1	1	41.13	46.39	40.17	47.95	20.95	40.52	46.93	23.12	38.95	40.03	21.61	42.65	35.86	265	102	792	277	256	1646	80	492	NA	NA	NA	NA
USNM_127	USNM	337847	11.3247	-85.7074	NIC	A	F	35.4	19.4	0.548023	2.7	2.7	1	1.2	0.6	0.5	1.1	1.1	1	51.62	60.54	31.05	48.04	40.23	39.68	43.98	35.13	51.34	35.31	45.1	31.34	41.13	265	102	792	277	256	1646	80	492	NA	NA	NA	NA
USNM_129	USNM	11422	20.9747	-89.6131	MEX	C	F	32.2	17.8	0.552795	NA	3.4	1	1.2	1.2	1	1.1	1.1	1	39.37	48.09	38.73	44.24	28.66	43.09	36.82	26.24	41.65	35.68	24.61	32.2	34.8	258	102	1930	276	230	958	70	95	4578	-576	11	1
USNM_131	USNM	11425	20.9747	-89.6131	MEX	C	F	35.6	16.9	0.474719	NA	3.9	1	1.2	0.7	0.583333	1	1	1	38.94	60.4	40.8	47.11	45.7	49.13	47.58	48.59	43.63	41.89	33	45.36	44.67	258	102	1930	276	230	958	70	95	4578	-576	11	1
USNM_134	USNM	108495	20.5049	-86.926	MEX	C	F	26.2	15.7	0.599237	3.1	3.1	1	1.1	1.1	1	0.9	0.9	1	30.97	62.36	23.4	43	25.41	39.4	34.32	31.91	59.17	45.36	41.12	41.69	40.15	261	91	1607	278	237	1396	52	240	7248	-987	7	1
USNM_135	USNM	108496	20.5049	-86.926	MEX	C	F	28	20	0.714286	3.2	3.2	1	1.1	1.1	1	1	1	1	33.65	65.8	29.45	45.5	37.11	42.41	36.65	37.38	42.13	46.11	38.61	33.21	39.9	261	91	1607	278	237	1396	52	240	7248	-987	7	1
USNM_136	USNM	108497	20.5049	-86.926	MEX	C	F	29.3	23.2	0.791809	3.4	3.4	1	1.2	1.2	1	1	1	1	32.68	64.21	28.66	35.94	36.73	48.42	35.35	37.48	44.42	35.99	39.64	37.44	39.05	261	91	1607	278	237	1396	52	240	7248	-987	7	1
USNM_137	USNM	108499	20.5049	-86.926	MEX	C	M	34.8	23.2	0.666667	3.9	3.9	1	1.3	1.3	1	1.1	1.1	1	29.74	61.28	32.43	32.62	24.78	34	49.31	30.1	54.36	46.16	26.56	33.94	36.87	261	91	1607	278	237	1396	52	240	7248	-987	7	1
USNM_138	USNM	172068	20.9335	-89.0166	MEX	C	M	34.2	18.4	0.538012	3.6	3.6	1	1.2	1.2	1	1.1	1.1	1	32.44	61.5	24.96	41.79	24.57	31.65	37.97	24.13	31.42	24.44	21.69	29.71	29.71	261	127	2060	281	232	1059	71	96	8249	-837	14	19
USNM_139	USNM	100531	19.8432	-90.5025	MEX	C	M	33.4	17.9	0.535928	3.3	3.3	1	1.2	0.5	0.416667	1	1	1	41.79	65.45	39.85	47.85	49.52	55.15	56.27	28.51	55.13	27.82	23.6	36.67	42.28	264	98	2084	285	234	1069	81	75	5866	-812	22	0
USNM_141	USNM	18342	29.3631	-100.929	USA	E	M	33.4	9.1	0.272455	4	3.9	0.975	1.5	0.9	0.6	1.1	1	0.909091	40.12	67.93	44.62	43.49	25.86	36.69	28.43	23.22	23.77	26.01	23.9	25.05	28.49	212	129	6888	295	119	432	51	49	3638	-963	297	1
USNM_142	USNM	24359	29.2425	-100.791	USA	E	M	35.2	12.3	0.349432	3.2	4.1	1	1.6	1.1	0.6875	1.3	1.3	1	46.62	66.55	48.73	24.45	24.95	32.36	34.85	22.8	37.4	30.11	24.56	29.87	29.04	213	129	6891	296	120	486	51	55	6435	-1065	266	12
USNM_144	USNM	14909	25.9	-97.4725	USA	D	F	36.9	18.1	0.490515	NA	4.1	1	1.5	1.1	0.733333	1.2	1.2	1	39.68	62.01	35.12	33.44	27.81	29.75	44.03	23.85	26.49	26.12	21.34	29.68	29.17	231	98	4803	288	165	686	55	107	4895	-832	13	5
USNM_145	USNM	31909	27.8368	-97.4925	USA	E	M	35.9	16.6	0.462396	3.1	4.2	1	1.5	0.9	0.6	1.2	1.2	1	41.84	67.95	35.21	32.84	19.59	19.72	34.77	22.32	29.84	24.25	19.33	37.74	26.71	220	105	5676	287	142	798	45	133	7509	-900	5	0
USNM_146	USNM	31415	27.7917	-97.3955	USA	E	M	33.8	17.3	0.511834	3.6	3.6	1	1.6	1.6	1	1.2	1.2	1	38.75	63.84	38.06	51.56	31.22	51.24	39.66	25.87	26.65	43.72	25.22	28.53	35.96	221	97	5585	287	144	793	45	134	1936	-808	12	0
USNM_147	USNM	32691	25.9	-97.4725	USA	D	F	38.7	22.7	0.586563	NA	NA	1	1.5	1.5	1	1.2	1.2	1	38.34	67.24	24.59	27.25	24.38	28.02	20.17	36.26	33.44	24.07	18.62	26.53	26.53	231	98	4803	288	165	686	55	107	4895	-832	13	5
USNM_148	USNM	33131	25.9	-97.4725	USA	D	F	34.4	17.3	0.502907	3.2	3.2	1	1.5	1.5	1	1.2	1.2	1	54.29	61.76	29.56	53.29	43.04	42.41	46.34	49.14	63.92	50.24	42.66	57.18	49.8	231	98	4803	288	165	686	55	107	4895	-832	13	5
USNM_149	USNM	33132	25.9	-97.4725	USA	D	M	31.4	18.6	0.592357	3.4	3.4	1	1.4	1.4	1	1.2	1.2	1	46.9	66.44	33.7	51.52	31.05	50.81	61.37	38.81	66.55	41.61	32.33	63.57	48.62	231	98	4803	288	165	686	55	107	4895	-832	13	5
USNM_150	USNM	63130	29.3014	-100.418	USA	E	F	36.9	18.3	0.495935	3.5	3.5	1	1.4	1	0.714286	1.1	1.1	1	38.75	56.15	36.85	20.85	21.4	21.04	36.82	20.92	26.37	22.79	21.02	22.74	23.77	202	136	6793	283	109	555	43	73	5314	-1144	347	6
USNM_151	USNM	63131	29.3014	-100.418	USA	E	M	40.4	25.5	0.631188	3.7	3.7	1	1.7	1.4	0.823529	1.3	1.3	1	41.04	55.47	49.19	35.65	28.22	38.49	35.97	24.91	44.75	51.46	22.34	43.82	36.18	202	136	6793	283	109	555	43	73	5314	-1144	347	6
USNM_152	USNM	143137	29.3014	-100.418	USA	E	M	37.5	18.1	0.482667	3.8	3.8	1	1.6	1.2	0.75	1.3	1.3	1	58.56	58.64	57.21	53.86	42.11	57.52	34.92	37.84	43.67	45.06	36.34	41.02	43.59	202	136	6793	283	109	555	43	73	5314	-1144	347	6
USNM_153	USNM	61841	27.3549	-81.0438	USA	E	M	29.6	11.2	0.378378	3.4	2.9	0.852941	1.4	0.9	0.642857	1.2	1.2	1	56.08	74.74	59.66	36.17	21.36	23.86	36.85	27.41	25.23	33.65	21.56	25.55	27.96	225	124	4042	272	169	1194	56	153	7834	-1027	18	36
USNM_154	USNM	61843	27.3247	-81.0348	USA	E	M	33.5	13.5	0.402985	3.3	3.2	0.969697	1.7	0.9	0.529412	1.4	1.4	1	52.96	66.15	58.36	59.17	39.68	50.14	53.92	47.72	44.26	45.32	29.96	31.69	44.65	225	123	4051	273	169	1188	55	152	8574	-1008	14	66
USNM_155	USNM	61844	27.3247	-81.0348	USA	E	M	31.1	8.4	0.270096	3.2	2.8	0.875	1.4	0.5	0.357143	1.2	0.8	0.666667	40.96	69.79	54.01	28.45	31.93	38.43	30	32.84	34.32	40.2	26.59	35.89	33.18	225	123	4051	273	169	1188	55	152	8574	-1008	14	66
USNM_156	USNM	63997	27.4337	-81.0345	USA	E	M	38.1	17.4	0.456693	3.8	3.6	0.947368	1.6	0.8	0.5	1.2	1.2	1	45.36	65.59	51.82	34.36	36.15	24.86	25.26	25.75	30.26	33.44	29.73	27.87	29.74	225	123	4063	272	169	1206	55	156	8161	-1041	19	20
USNM_157	USNM	63998	27.3885	-81.0379	USA	E	F	32.3	11.5	0.356037	NA	3.92	NA	1.4	0.7	0.5	1.2	1.2	1	52.5	63.21	62.72	36.54	27.63	38.78	33.72	33.12	40.46	47.14	35.6	40.15	37.02	225	123	4087	273	169	1198	56	155	7759	-1046	17	9
USNM_158	USNM	71753	24.5679	-81.7614	USA	D	F	28.7	9.6	0.334495	3.8	3.8	1	1.5	1	0.666667	1.2	1	0.833333	51.5	62.63	52.42	32.96	35.09	31.3	37.05	27.64	35.63	43.21	38.48	33.4	34.97	252	60	2904	286	212	1004	46	148	3475	-1408	1	0
USNM_159	USNM	79113	28.7935	-81.0278	USA	E	M	33.8	12.1	0.357988	NA	3.5	NA	1.5	0.3	0.2	1.2	0.7	0.583333	52.3	61.76	55.4	37.68	28.85	36.43	34.97	29.14	30.46	35.34	35.36	38.57	34.09	217	107	4574	271	155	1294	45	196	8991	-998	8	61
USNM_161	USNM	79116	28.7935	-81.0278	USA	E	M	33.7	13.9	0.412463	NA	3.4	NA	1.4	0.4	0.285714	1.3	0.3	0.230769	42.88	68.02	52.45	35.27	27.73	48.12	52.93	20.31	28.66	47.92	21	35.01	35.22	217	107	4574	271	155	1294	45	196	8991	-998	8	61
USNM_163	USNM	111239	27.9662	-81.452	USA	E	M	30.3	12.5	0.412541	3.4	3.3	0.970588	1.6	0.5	0.3125	1.2	1	0.833333	44.57	62.63	45.85	32.2	27.62	34.2	34.65	38.34	34.93	38.81	32.53	35.8	34.34	224	127	4307	275	165	1220	53	184	7194	-1006	24	28
USNM_164	USNM	111262	27.9662	-81.452	USA	E	F	34.8	13.3	0.382184	4	3.7	0.925	1.3	0.2	0.153846	1.1	1.1	1	62.46	70.69	58.69	37.72	37.77	42.72	32.23	27.64	44.82	37.67	32.23	33.68	36.28	224	127	4307	275	165	1220	53	184	7194	-1006	24	28
USNM_165	USNM	263699	29.1553	-81.8614	USA	E	F	30	9.6	0.32	3.7	3.4	0.918919	1.4	0.9	0.642857	1	1	1	71.8	73.51	67.87	45.34	37.27	53.19	42.97	35.83	45.56	38.04	31.72	51.72	42.4	209	127	5000	269	142	1288	40	232	7912	-1010	24	57
USNM_171	USNM	111274	27.9662	-81.452	USA	E	M	33.9	12.4	0.365782	3.5	3.2	0.914286	1.5	1.5	1	1.2	1.2	1	50.5	67.63	57.15	45.03	35.89	37.56	38.94	31.72	37.53	36.7	32.9	52.12	38.71	224	127	4307	275	165	1220	53	184	7194	-1006	24	28
USNM_172	USNM	231584	25.4939	-80.4828	USA	D	M	30.9	11.3	0.365696	NA	3.7	1	1.6	NA	NA	1.4	NA	NA	53.04	73.62	52.79	53.12	35.56	36.8	40.73	32.2	46.52	42.74	31.73	60.45	42.21	236	98	3241	274	193	1548	60	134	6846	-821	8	8
USNM_176	USNM	33060	31.7244	-81.4747	USA	F	F	28.5	10.8	0.378947	3.5	2.9	0.828571	1.4	1.4	1	1.3	1.3	1	60.12	65.85	57.44	34.23	23.7	36.03	42.43	27.72	48.74	41.87	31.7	39.31	36.19	192	116	6238	268	110	1260	34	261	8786	-982	10	72
USNM_177	USNM	223934	30.9275	-82.2959	USA	E	M	32.9	10.6	0.322188	NA	4.1	NA	1.6	0.5	0.3125	1.4	0.4	0.285714	66.6	73.16	34.13	42.01	43.61	37.17	41.78	40.9	33.45	42.65	33.81	48.26	40.4	195	136	5924	267	115	1314	33	289	8679	-867	50	82
USNM_179	USNM	34290	30.2611	-91.991	USA	E	F	30.2	12.1	0.400662	3.9	3.7	0.948718	1.5	0.8	0.533333	1.2	1.2	1	58.56	62.99	51.59	44.53	30.49	34.74	44.81	32.71	40.63	43.11	28.49	36.43	37.33	196	113	6204	271	113	1492	14	386	8540	-862	17	64
USNM_181	USNM	139776	29.7022	-92.2117	USA	E	M	28.8	9.2	0.319444	3.6	3.51	0.975	1.5	0	0	1.1	0.7	0.636364	55.44	67.55	55.57	53.95	42.07	47.54	43.14	34.48	40.45	36.84	39.22	45.54	42.58	198	101	6135	270	113	1541	25	347	8753	-1132	1	38
USNM_182	USNM	247171	29.7065	-91.1955	USA	E	M	33.4	11.3	0.338323	3.5	3.4	0.971429	1.4	0	0	1.1	0	0	58.03	69.25	59.32	47.58	30.16	36.39	29.57	44.77	31.49	35.26	39.13	38.25	36.96	201	108	5888	272	121	1624	24	381	7592	-901	3	10
USNM_186	USNM	33126	30.3116	-89.339	USA	E	M	32.3	15.2	0.470588	NA	3.41	NA	1.5	0.4	0.266667	1.1	0.8	0.727273	57.92	71.99	55.46	46.85	32.43	48.03	39.33	21.13	32.58	33.7	28.81	43.23	36.23	194	107	6094	268	113	1572	17	411	7510	-1123	10	9
USNM_187	USNM	33849	30.3116	-89.339	USA	E	F	31.1	7.4	0.237942	3.7	3.62	0.978378	1.5	0.8	0.533333	1.3	0	0	50.67	64.83	55.8	31.19	21.22	38.08	38.84	26.55	25.89	25.25	23.24	35.85	29.57	194	107	6094	268	113	1572	17	411	7510	-1123	10	9
USNM_189	USNM	186544	32.4337	-80.6741	USA	F	F	28.1	10.3	0.366548	3.8	3.3	0.868421	1.3	0.1	0.0769231	1.1	1.1	1	57	62.91	61.6	36.57	35.44	38.59	42.9	23.04	31.26	40.92	30.91	46.89	36.28	186	111	6506	266	99	1274	34	259	4553	-908	8	13
USNM_190	USNM	32431	28.7035	-95.9624	USA	E	F	28.7	10.9	0.379791	4.2	4.11	0.978571	1.3	0.7	0.538462	1	1	1	60.29	64.93	55.74	47.84	29.08	40.56	41.63	34.3	37.61	33.86	42.92	34.61	38.05	212	95	5902	283	131	1145	32	228	7507	-1146	5	28
USNM_192	USNM	32433	28.9042	-96.1831	USA	E	F	30.8	16.4	0.532468	3.8	3.8	1	1.4	1.4	1	1.2	1.2	1	54.25	69.94	56.33	41.37	44.27	46.59	42.6	44.38	37.94	42.29	48.09	37.27	42.76	208	106	6009	280	126	1115	28	221	7988	-1081	14	33
USNM_193	USNM	203535	34.8518	-87.5278	USA	F	F	29.3	11.2	0.382253	NA	3.8	1	1.4	0	0	1.1	0	0	67.1	71.52	71.99	58.21	45.34	43.11	50.78	38	49.43	43.18	45.72	51.99	47.31	154	133	7739	250	51	1396	18	391	8183	-936	181	44
USNM_194	USNM	207189	33.9951	-87.099	USA	F	M	28.4	6.6	0.232394	NA	3.9	NA	1.5	0	0	1.2	0	0	68.98	71.7	72.42	53.62	43.3	54.18	47.93	36.47	37.36	49.25	33	50.81	45.1	156	136	7523	250	56	1462	18	415	7866	-996	192	13
USNM_196	USNM	197061	34.4968	-91.5613	USA	F	M	32.1	8.3	0.258567	4.2	4.9	1	1.7	0	0	1.5	0	0	54.07	70.29	67.27	42.93	35.61	32.83	42.05	49.5	46.06	52.61	37.52	41.09	42.24	167	117	8031	267	59	1265	20	327	7057	-944	60	8
USNM_205	USNM	347670	38.3622	-87.7109	USA	G	M	NA	NA	NA	3.6	3.5	0.972222	1.5	1	0.666667	1.2	0.5	0.416667	70.73	76.54	70.02	55.83	35.95	44.53	40.91	43.3	53.65	47.45	31.58	37.89	43.45	129	117	9157	243	6	1112	18	233	8761	-866	129	48
USNM_206	USNM	347672	40.2906	-85.4233	USA	H	M	31.8	10.4	0.327044	NA	3.61	NA	1.6	0	0	1.4	0.4	0.285714	70.83	77.54	66.69	40.83	45.04	45.24	54.81	47.42	53.13	52.11	37.7	51.54	47.54	100	111	9578	218	-30	957	20	178	8639	-838	277	1
USNM_207	USNM	347673	40.4298	-86.9533	USA	H	F	27.9	11.4	0.408602	NA	4.4	1	1.4	1	0.714286	1.1	1.1	1	74.8	70.33	78.05	37.88	34.87	53.04	36.73	51.73	51.32	42.74	51.31	46.8	45.16	102	115	9687	220	-30	946	24	162	8384	-841	204	21
USNM_208	USNM	506572	40.7461	-86.171	USA	H	M	25.4	7.3	0.287402	3.2	3.1	0.96875	1.6	0	0	1.3	0.7	0.538462	69.4	75.22	65.7	60.05	57.68	51.81	58.64	35.37	57.6	47.14	37.88	59.7	51.76	99	115	9654	218	-33	949	22	170	8268	-844	196	11
USNM_209	USNM	506573	40.8402	-85.7313	USA	H	M	25.2	5.6	0.222222	2.5	3.2	0.96	1.7	0	0	1.4	0.3	0.214286	70.94	75.53	71.37	54.82	33.04	53.02	54.1	69.89	73.53	55.77	46.41	66.47	56.34	97	118	9564	215	-34	965	21	174	8046	-859	219	24
USNM_213	USNM	268016	37.6801	-84.4181	USA	G	F	24.7	7.7	0.311741	NA	3.8	NA	1.4	0	0	1.2	1	0.833333	73.8	76.24	73.18	64.37	52.45	59.88	52.78	46.96	55.44	58.05	49.9	43.5	53.7	129	120	8351	233	17	1207	14	279	8296	-917	292	15
USNM_215	USNM	116197	38.9771	-77.1573	USA	G	M	30.5	10.2	0.334426	3.5	3.2	0.914286	1.6	1	0.625	1.2	1.1	0.916667	67.62	75.03	68.21	57.61	46.96	43.27	37.11	33.79	45.84	54.29	39.85	50.35	45.45	129	120	8548	237	15	1020	12	219	8741	-688	53	56
USNM_224	USNM	397176	38.0678	-75.568	USA	G	M	27.4	8.2	0.29927	3.9	3.5	0.897436	1.5	0	0	1.1	0.9	0.818182	69.19	77.77	67.11	55.89	43.29	51.27	43.63	37.09	50.58	55.79	43.19	38.02	46.53	137	103	7899	237	34	1049	14	246	6970	-917	4	4
USNM_225	USNM	397187	38.0678	-75.568	USA	G	M	26.9	6.5	0.241636	NA	3.8	NA	1.7	0	0	1.3	0.6	0.461538	71.48	79.18	70.48	32.79	35.49	51.31	52.7	33	45.75	42.1	35.28	46.03	41.61	137	103	7899	237	34	1049	14	246	6970	-917	4	4
USNM_227	USNM	235291	36.5073	-92.245	USA	G	M	36	9.8	0.272222	4.1	3.9	0.95122	1.8	0	0	1.5	0.1	0.0666667	72.43	75.2	69.38	32.75	NA	35.76	NA	39.74	49.36	34.03	34	43.57	37.72	138	141	8608	245	21	1102	18	221	7771	-1018	228	22
USNM_228	USNM	34867	36.6681	-93.3347	USA	G	F	26.4	6.7	0.253788	NA	3.5	NA	1.4	1.4	1	1.1	1.1	1	69.04	64.12	65.1	47.03	33.48	52.25	44.14	40.96	46.05	43.38	36.98	42.44	42.97	131	135	8551	237	16	1116	21	195	7939	-968	388	39
USNM_234	USNM	360907	35.3719	-77.964	USA	G	M	31.3	10.1	0.322684	3.6	3.4	0.944444	1.5	0	0	1.1	0	0	64.08	71.07	63.88	44.83	29.87	39.89	37.86	27.34	39.04	41	30.38	42.3	36.95	161	121	7365	254	64	1240	25	276	7971	-804	30	37
USNM_237	USNM	252999	39.2909	-81.9765	USA	H	F	25.4	12.4	0.488189	NA	3.9	NA	1.3	1.3	1	1.1	1.1	1	58.24	56.22	56.5	40.92	36.06	47.9	51.89	41.97	51.11	58.73	43.1	48.08	46.64	112	129	8638	219	-5	1028	17	212	9022	-821	250	82
USNM_239	USNM	36179	34.8473	-95.5668	USA	F	F	29.6	13.3	0.449324	3.9	3.82	0.979487	1.5	1	0.666667	0.3	0.3	1	52.56	63.38	61.97	44.11	37.93	43.52	39.55	34.29	40.13	41.74	39.98	44.61	40.65	164	129	8207	266	53	1165	28	193	7028	-1096	225	11
USNM_240	USNM	132448	34.1517	-98.2789	USA	F	M	20.9	11.7	0.559809	3.4	3.3	0.970588	1.7	0	0	1.2	1.2	1	58.59	65.22	61.01	55.59	38.75	46.17	48.51	41.7	60.84	54.73	37.47	47.62	47.93	172	142	8531	280	59	782	39	110	7566	-1214	277	8
USNM_241	USNM	132449	34.1517	-98.2789	USA	F	M	34	13.2	0.388235	4	4	1	1.6	0.4	0.25	1.3	1.1	0.846154	69.48	71.32	70.56	64.71	45.57	60.26	59.15	47.67	59.64	51.92	48.06	55.18	54.68	172	142	8531	280	59	782	39	110	7566	-1214	277	8
USNM_242	USNM	132450	34.1517	-98.2789	USA	F	M	29.1	10.2	0.350515	3.7	3.6	0.972973	1.6	0	0	1.3	0	0	63.81	64.45	67.34	59.69	45	61.37	53.26	53.13	66.67	54	56.39	61.99	56.83	172	142	8531	280	59	782	39	110	7566	-1214	277	8
USNM_243	USNM	132452	34.1517	-98.2789	USA	F	M	28	8.1	0.289286	3.4	3.1	0.911765	1.5	0	0	1.2	0	0	64.63	74.4	74.3	54.59	46.14	50.67	40.97	30.08	59.46	50.11	37.54	52.64	46.91	172	142	8531	280	59	782	39	110	7566	-1214	277	8
USNM_244	USNM	132453	34.1517	-98.2789	USA	F	F	32.7	12.6	0.385321	3.8	3.7	0.973684	1.5	0	0	1.2	0.2	0.166667	63.47	68.4	64.55	49.23	57.17	48.62	51.22	40.01	50.03	44.84	41.75	44.47	47.48	172	142	8531	280	59	782	39	110	7566	-1214	277	8
USNM_246	USNM	132455	34.7678	-98.5921	USA	F	M	26.5	9.4	0.354717	3.8	3.4	0.894737	1.4	0.4	0.285714	1.2	0	0	60.49	68.91	66.38	59.77	48.37	57.54	61.99	33.28	61.14	44.41	28.95	47.4	49.21	158	137	8791	269	42	746	42	96	7822	-1151	455	21
USNM_251	USNM	273966	34.7221	-98.7003	USA	F	F	34	9.3	0.273529	NA	3.6	NA	1.7	0	0	1.4	0.5	0.357143	67.24	63.93	63.25	39.93	35.27	41.39	47.41	39.68	60.27	56.02	41.07	52.51	45.95	156	140	8843	267	38	739	40	98	5859	-1150	504	32
USNM_253	USNM	173088	32.7851	-79.8614	USA	F	M	28.4	8.1	0.285211	NA	3.8	NA	1.4	0.4	0.285714	1.1	1.1	1	53.28	70.22	51.8	53.57	41.17	42.66	44	36.49	46.19	49.32	43.64	50.4	45.27	187	95	6480	267	100	1248	32	252	7605	-803	11	29
USNM_255	USNM	34864	36.2372	-88.0877	USA	G	F	30.4	10.3	0.338816	4	3.91	0.9775	1.3	1	0.769231	1.1	1.1	1	56.53	56.76	53.18	40.83	43.12	36.42	49.45	44.13	55.46	46.91	44.27	45.68	45.14	143	133	8265	245	30	1342	15	352	7927	-939	123	55
USNM_257	USNM	267411	36.3561	-83.4153	USA	G	M	29	8.9	0.306897	NA	4.4	NA	1.5	0	0	1.3	0.5	0.384615	64.33	78.22	69.05	45.62	45.04	47.52	39.76	33.31	34.54	43.03	37.83	44.7	41.26	127	133	7789	225	24	1241	14	320	8876	-886	479	39
USNM_258	USNM	267413	36.5385	-87.3601	USA	G	M	31.2	9.1	0.291667	NA	3.9	NA	1.6	0.9	0.5625	1.4	1	0.714286	74.53	79.75	74.75	46.37	37.71	44.37	52.59	39.35	40.56	44.93	34.12	42.81	42.53	143	134	8442	249	30	1271	16	340	7017	-826	137	2
USNM_261	USNM	112025	29.953	-98.8039	USA	E	F	32.8	10.9	0.332317	3.7	3.7	1	1.5	0.4	0.266667	1.2	1.2	1	49.03	68.1	59.52	38.82	43.39	40.89	43.05	37.7	40.29	40.28	49.47	41.93	41.76	191	136	6625	271	101	792	32	134	7166	-1098	408	8
USNM_262	USNM	186548	30.7527	-99.2346	USA	E	M	32.8	11.2	0.341463	3.9	3.6	0.923077	1.7	0	0	1.4	1.4	1	57.7	67	59.48	49.63	38.96	38.95	47.71	36.09	52.97	41.68	41.18	41.75	43.21	181	148	7139	268	84	665	37	97	6692	-1182	476	3
USNM_263	USNM	186547	30.7527	-99.2346	USA	E	F	30.1	11.6	0.385382	3.5	3.5	1	1.5	0.8	0.533333	1.2	1.2	1	60.44	69.54	61.93	37.02	36.99	37.88	32.02	33.32	34.88	33.88	37.23	40.2	35.94	181	148	7139	268	84	665	37	97	6692	-1182	476	3
USNM_265	USNM	348326	33.9628	-98.7754	USA	F	F	32.4	9.9	0.305556	4.1	NA	NA	1.6	0.5	0.3125	1.2	1.1	0.916667	66.03	72.54	67.97	57.01	33.07	43.5	46.59	41.07	50.21	53.02	54.71	66.87	49.56	174	145	8595	282	60	711	40	98	8181	-1218	316	11
USNM_266	USNM	251440	38.0911	-75.2049	USA	G	M	27.8	9.1	0.327338	4	3.5	0.875	1.5	0	0	1.2	0	0	69.88	76.45	70.19	47.73	33.64	42.62	45.98	32.48	47.69	51.18	38.18	53.58	43.68	136	99	7765	234	35	1067	14	253	4965	-1866	3	12
USNM_270	USNM	293195	37.2282	-80.3905	USA	G	M	31.4	14.5	0.461783	2.8	2.73	0.975	1.7	1	0.588235	1.4	1.4	1	58.42	67.54	58.09	41.35	32.19	48.75	46.74	32.03	41.59	44.03	32.9	43.22	40.31	112	132	7693	208	6	997	11	210	9120	-881	637	74
USNM_273	USNM	349915	38.7072	-77.156	USA	G	M	25.4	11.5	0.452756	3.6	3.4	0.944444	1.4	0.5	0.357143	1.2	0.5	0.416667	66.28	76.69	70.56	63.06	51.51	67.31	70.45	44.39	59.3	58.82	36.83	58.05	56.64	131	115	8411	236	19	997	11	224	7944	-764	26	42
USNM_274	USNM	567500	37.2282	-80.3905	USA	G	M	28	12.1	0.432143	3.5	3.2	0.914286	1.4	0.7	0.5	1.1	1.1	1	69.68	76.14	70.59	58.31	33.98	48.79	43.24	29.17	47.59	48.07	32.75	50.62	43.61	112	132	7693	208	6	997	11	210	9120	-881	637	74
USNM_275	USNM	589209	37.393	-80.5598	USA	G	F	31.5	11.8	0.374603	NA	NA	NA	1.4	0	0	1.2	1.2	1	72	68.23	68.92	64.66	43.74	67.87	57.89	38.52	70.67	62.75	50.93	65.54	58.06	91	121	7583	185	-11	1098	11	232	8772	-858	1035	80
USNM_276	USNM	260240	38.4292	-82.3368	USA	G	F	27	8.2	0.303704	NA	3.7	NA	1.3	0	0	1.1	0	0	72.69	71.78	69.34	49.58	35.69	52.37	48.17	37.09	48.86	52.31	35.03	53.12	45.8	121	131	8316	224	9	1094	15	240	9070	-788	238	77
USNM_278	USNM	396183	39.0567	-78.9601	USA	H	M	32.2	14.8	0.459627	3.9	3.81	0.976923	1.6	0	0	1.2	1.2	1	64.23	78.62	64.92	60.31	56.38	59.33	57.67	43.52	60.88	65.09	35.02	57.16	55.04	114	140	8296	218	1	893	17	171	8475	-905	263	0
USNM_280	USNM	600217	38.9478	-77.4908	USA	G	M	35.2	16.1	0.457386	NA	3.3	NA	1.6	0.9	0.5625	1.2	1.2	1	61.34	77.32	63.96	38.15	32.37	34.57	37.12	36.9	51.12	43.7	29.64	48.74	39.15	125	124	8507	233	12	1005	11	214	7505	-804	93	3

## Sheet: Dimesion_residuals_average
ID	LAT	LONG	BLSEXRES	TLSEXRES	HFTLSEXRES	BERLSEXRES	Bio1	Bio2	Bio4	Bio10	Bio11	Bio12	Bio15	Bio19	NDVIMAX	ROUGH	ELEV	TREECOV
USNM_123_124_125_126_127	11.3247	-85.7074	-1.56488	1.59522	-0.78624	-0.156923	265	102	792	277	256	1646	80	492	NA	NA	NA	NA
USNM_103_104_106_107_108_109_110_111_112_113	12.276	-86.3659	-2.96235	5.53455	-0.388872	0.160052	275	104	935	288	264	1116	104	321	NA	NA	NA	NA
USNM_114_121_122	12.4172	-86.6451	0.600942	4.77544	-0.357804	-0.269048	268	109	871	280	258	1390	107	68	NA	NA	NA	NA
USNM_116_118_119	12.5503	-87.1661	0.530061	1.14321	-0.515625	0.0642857	274	114	933	286	262	1626	97	91	NA	NA	NA	NA
USNM_120	13.0188	-85.8355	-3.68467	1.66577	-0.952027	0.132468	202	101	871	212	190	1808	62	277	9160	-692	1029	31
MVZ_053_54	13.2333	-88.3667	-1.82176	1.54487	-0.509728	NA	261	114	782	272	254	1764	98	337	9155	-833	18	65
MVZ_048_50_51_52	13.3167	-88.0667	-1.87176	2.86987	0.315272	0.0112284	258	116	748	268	256	1831	99	346	8804	-897	253	0
MVZ_046	13.7667	-88.2167	3.34114	4.52398	-0.167429	NA	193	113	892	203	184	2222	91	17	8621	-776	1258	68
USNM_006	13.9753	-91.0565	0.641143	NA	-0.367429	NA	275	107	760	285	266	1599	89	8	9441	-937	9	24
AMNH_044	14.0822	-87.2143	2.04114	6.02398	0.432571	-0.43125	219	111	1308	232	201	1010	82	67	3922	-783	976	1
AMNH_049	14.1397	-87.9082	-3.08467	2.46577	-0.252027	-0.267532	170	103	1467	185	151	1701	80	66	8314	-832	1797	54
AMNH_045	14.2461	-87.9555	-1.78467	-1.33423	0.347973	-0.567532	198	114	1387	214	180	1449	84	43	8313	-871	1319	19
AMNH_039_40_42_43	14.284	-87.2577	-1.60321	-0.144677	0.219123	-0.134199	225	117	1428	241	204	1182	70	117	7344	-960	866	21
MVZ_043	14.3833	-89.1333	-4.28467	-0.734228	-0.852027	NA	132	92	1069	142	120	2359	72	131	8679	-844	2504	74
AMNH_050_51	14.5853	-88.5848	3.21533	3.01577	0.097973	0.232468	224	123	1534	241	202	1261	74	107	6851	-898	815	29
USNM_019	15.0159	-92.3932	1.54114	4.62398	0.232571	NA	274	131	768	285	264	2496	85	125	8201	-768	56	24
USNM_008	15.4324	-88.0112	-9.45886	NA	-0.667429	NA	267	104	1421	281	246	1489	37	328	7232	-782	46	3
USNM_007	15.5013	-88.0286	-0.384667	4.66577	0.147973	NA	264	103	1472	278	242	1382	38	293	4084	-670	98	0
USNM_005	15.8013	-91.7528	-5.08467	1.06577	-0.552027	NA	228	135	1108	240	213	1611	89	113	7874	-871	840	32
USNM_018	16.2044	-92.088	-11.6589	-6.07602	-0.867429	NA	186	139	1209	199	169	1006	86	34	7117	-922	1589	14
AMNH_062_64_65_66	16.2225	-94.856	6.75969	4.50943	0.136422	0.356656	273	102	1367	288	254	1216	113	10	7031	-1538	6	6
AMNH_063	16.3184	-94.754	-1.45886	-1.47602	0.132571	NA	271	103	1442	286	250	1066	112	6	6845	-1207	40	2
USNM_076_78	16.3187	-95.2409	-3.50886	5.02398	0.232571	0.11875	276	108	1359	290	256	860	114	10	5139	-920	42	2
USNM_069_72	16.3326	-95.2227	2.67824	4.49487	0.132571	0.26875	276	107	1390	290	256	870	114	11	5533	-930	45	0
AMNH_071	16.3328	-95.2277	-4.65886	4.42398	0.332571	-0.23125	276	107	1385	291	256	866	113	11	3896	-930	53	0
USNM_020	16.3474	-92.5492	-1.65886	0.823977	-0.367429	NA	236	149	1363	253	211	1374	97	36	6951	-858	794	16
CNMA_038	16.3669	-94.1944	0.415333	-0.234228	0.247973	-0.0675325	267	120	1005	279	254	1608	106	12	7204	-822	59	12
AMNH_070	16.4175	-95.3327	0.941143	-3.97602	-0.367429	-0.43125	276	116	1431	291	256	849	117	8	8507	-891	78	35
AMNH_067-68	16.4266	-95.4102	-3.07176	-1.55513	-0.509728	-0.63125	269	122	1483	285	247	748	115	4	8611	-977	234	39
CNMA_015	16.69	-99.6256	-9.6573	-1.92677	-0.0421622	NA	202	171	2647	230	277	471	80	15	NA	NA	NA	NA
AMNH_014_USNM_048	16.7284	-92.6271	-0.121762	0.194875	-0.0097278	0.46875	151	130	1198	162	133	1208	72	75	6884	-813	2148	3
USNM_012	16.7633	-93.3643	-8.88467	-0.334228	-0.152027	NA	226	125	1601	243	209	962	91	35	8212	-867	989	27
CNMA_016	16.8272	-99.8047	-4.45886	2.42398	-0.267429	0.06875	284	111	721	292	274	1116	110	18	8751	-776	15	38
USNM_013	16.8593	-93.4122	-3.65886	-0.276023	-0.167429	NA	228	120	1707	245	204	914	83	57	7551	-794	922	34
USNM_037_38_39_40	16.8831	-99.8879	0.578238	2.41987	-0.184728	NA	277	115	704	285	261	1140	111	21	6752	-806	271	16
USNM_077	16.9613	-95.0964	6.01533	3.86577	-0.552027	0.432468	244	107	1715	265	219	1594	89	109	7785	-786	260	36
CNMA_017	16.9725	-100.015	-2.75886	4.62398	0.432571	-0.43125	284	110	752	293	273	999	111	14	8625	-909	17	43
AMNH_047	17.1551	-92.9	4.34114	4.92398	0.432571	0.46875	180	119	1328	192	160	2181	50	325	8190	-804	1675	17
USNM_015_16_17	17.2801	-92.3142	4.36587	3.00458	-0.128961	NA	199	118	1378	211	173	3519	55	521	8866	-721	1399	26
AMNH_088_89	17.4381	-95.0234	-3.67176	1.54487	-0.109728	0.350609	253	106	2138	278	223	2345	85	193	8141	-882	28	18
MALH_014	17.4748	-100.173	1.41533	5.26577	0.447973	0.332468	152	101	737	162	149	1756	99	51	8465	-797	2655	59
MALH_015	17.5551	-99.6856	-3.55886	6.12398	0.132571	NA	182	110	918	195	171	1498	102	37	8269	-855	2250	73
USNM_088_089	17.5588	-92.9439	-1.82176	2.44487	-0.309728	-0.0493912	259	115	1983	278	230	3614	44	756	6071	-682	41	9
USNM_075	17.7984	-96.9627	-0.584667	7.06577	0.247973	0.332468	251	137	2370	280	214	500	103	12	6863	-882	611	10
USNM_100	17.9842	-94.5501	1.54114	1.02398	-0.467429	-0.13125	260	94	2108	283	230	2410	68	320	4627	-733	21	6
USNM_041	18.0781	-101.991	-7.28467	1.26577	-0.552027	NA	273	132	1167	285	257	950	107	31	7837	-875	127	20
USNM_073_74	18.0905	-96.1318	-1.22176	3.62398	0.240272	-0.549391	252	98	2393	278	219	2375	92	133	5357	-782	31	6
CNMA_037	18.1336	-97.8253	3.24114	8.92398	0.132571	NA	206	170	1958	228	178	584	101	14	6026	-975	1595	9
CNMA_020	18.3153	-99.93	-5.25886	7.42398	0.332571	-0.03125	236	144	1696	260	218	1038	111	17	8183	-842	1225	8
MALH_011	18.3351	-94.7507	2.04114	2.72398	-0.0674286	0.36875	244	91	1948	264	216	2490	65	362	8867	-838	224	38
AMNH_041	18.4007	-88.3899	-4.05886	-1.87602	-0.167429	0.26875	254	93	1570	270	232	1354	58	238	7632	-943	9	22
USNM_099	18.429	-95.1171	-1.05886	5.12398	-0.167429	-0.33125	236	92	2180	261	206	2306	72	255	7155	-848	396	34
USNM_010_11	18.4493	-90.1065	-0.958857	-1.42602	-0.917429	NA	253	121	2172	276	224	1204	66	120	9616	-819	202	81
MVZ_010	18.5322	-95.3072	3.01533	-0.134228	-0.152027	NA	243	92	2184	268	213	2778	65	420	7933	-826	296	12
CNMA_053_55_56_57_58	18.6192	-95.6612	0.950819	4.1807	-0.321268	NA	267	88	1784	285	241	1751	75	185	8010	-920	3	18
MALH_004	18.7388	-99.444	-0.384667	4.66577	-0.552027	-0.0675325	241	169	1883	265	215	903	105	24	8461	-876	1049	27
AMNH_087	18.7752	-95.7594	7.41533	5.76577	-0.052027	0.332468	261	84	2034	281	231	1681	82	129	7800	-1398	50	9
CNMA_031	18.8517	-99.4122	-0.358857	7.42398	0.232571	0.46875	215	144	1564	237	197	1094	103	42	8596	-841	1457	49
USNM_096	18.8552	-97.0913	-1.35886	0.723977	-0.167429	NA	195	115	1943	216	168	2061	82	127	4785	-633	1218	1
CNMA_028	18.8678	-99.4403	-2.28467	3.26577	-0.052027	0.0324675	209	141	1513	230	193	1077	103	41	8277	-844	1572	39
USNM_060	18.8786	-99.0589	-1.98467	-1.93423	-0.852027	NA	233	166	1776	256	209	926	100	35	7381	-781	1217	5
MALH_009	18.9016	-95.9557	-4.95886	4.72398	-0.267429	NA	261	86	2172	282	228	1542	93	86	8458	-1075	17	66
USNM_031_32_33_35	18.9405	-103.96	-1.09676	7.99487	-0.0097278	NA	264	127	1750	284	241	762	102	29	7255	-869	46	8
USNM_022_23_24_26_28_29_30	19.0526	-104.32	-1.41278	3.0276	-0.175114	NA	265	111	1609	283	244	987	113	32	5547	-917	44	54
USNM_059	19.0578	-101.607	-3.85886	-1.37602	0.232571	NA	201	155	1463	221	172	1184	110	33	8264	-906	1552	48
CNMA_026	19.0706	-99.3308	-3.75886	3.32398	0.232571	NA	110	143	1377	126	93	1318	95	53	8176	-986	3199	80
USNM_053	19.1158	-98.7602	-1.65886	3.32398	-0.0674286	NA	142	162	1610	160	119	947	93	26	8447	-845	2492	15
MVZ_005	19.1477	-101.442	-1.38467	-1.23423	0.147973	0.632468	233	160	1639	256	215	1086	113	27	8400	-858	1192	22
MVZ_006	19.2095	-101.457	-3.15886	0.523977	0.132571	0.26875	208	161	1683	231	181	1143	111	32	8394	-844	1482	33
USNM_080	19.2874	-98.4306	-2.38467	0.865772	-0.052027	-0.167532	155	161	1867	175	127	698	86	22	4036	-849	2248	2
CNMA_003_4	19.3125	-99.1881	-3.27176	1.54487	0.540272	NA	156	172	2133	179	126	847	95	24	6809	-330	2318	35
CNMA_008	19.3178	-99.1841	-4.85886	5.12398	0.232571	NA	156	172	2118	179	126	839	96	24	6365	-309	2309	14
CNMA_009	19.3207	-99.1777	-4.75886	-1.57602	-0.367429	NA	158	172	2084	180	128	830	95	24	3538	-288	2294	12
MALH_002_6	19.3216	-99.1902	3.46533	3.16577	0.147973	0.432468	156	172	2118	179	126	839	96	24	6365	-309	2309	14
CNMA_010	19.3225	-99.1947	3.51533	5.96577	0.347973	NA	156	172	2119	179	127	847	95	30	6284	-309	2328	12
CNMA_002	19.3234	-99.1852	5.44114	1.42398	0.332571	0.26875	156	172	2118	179	129	839	96	24	6365	-309	2309	14
CNMA_011	19.3253	-99.1892	3.31533	4.16577	0.847973	NA	158	172	2083	181	127	832	95	30	4767	-309	2291	4
MALH_010_13	19.3302	-96.6281	0.428238	1.89487	-0.0097278	-0.567532	247	117	2261	271	214	980	95	54	8470	-857	256	40
CNMA_005_6	19.3326	-99.1855	-6.13467	-1.18423	0.047973	0.232468	158	172	2083	181	129	832	95	23	4767	-309	2291	4
USNM_097	19.4172	-97.0073	5.34114	7.32398	0.532571	0.86875	188	103	2089	210	157	1875	69	168	8042	-702	1295	27
CNMA_024	19.4817	-98.8235	2.54114	10.124	0.732571	0.36875	143	177	1965	164	117	626	81	23	5585	-835	2468	3
CNMA_022	19.5614	-105.083	-7.85886	0.423977	NA	NA	265	129	1679	284	242	708	106	27	8223	-1078	71	29
USNM_046	19.7047	-103.447	-3.38467	2.06577	-0.052027	NA	180	149	1918	201	164	776	97	47	8249	-820	1700	28
AMNH_058	19.71	-103.471	0.941143	-3.07602	0.0325714	-0.43125	194	150	1932	215	165	614	97	49	4960	-827	1514	4
USNM_055_56_57	19.8062	-100.891	1.42394	3.01851	-0.0904942	NA	175	158	2204	201	147	748	102	30	7302	-882	1904	13
USNM_139	19.8432	-90.5025	-10.9589	-0.376023	-0.467429	-0.33125	264	98	2084	285	234	1069	81	75	5866	-812	22	0
CNMA_054	20.0162	-97.1416	1.24114	11.824	-0.267429	NA	239	115	2694	266	199	1441	47	218	7912	-814	171	12
CNMA_040	20.1066	-97.3564	-4.35886	-0.176023	-0.167429	NA	225	109	2961	254	188	2281	49	290	8525	-849	379	7
USNM_042_43	20.1318	-98.7407	-11.6218	-0.155125	-0.459728	NA	140	137	1672	161	107	615	71	65	1968	-887	2460	2
USNM_044	20.1382	-98.6736	-10.6589	-1.27602	-1.26743	NA	121	128	1561	140	97	870	68	73	4630	-944	2746	1
USNM_054	20.2799	-102.474	-4.18467	0.665772	-0.152027	NA	199	156	2396	225	164	787	109	31	8005	-864	1534	16
USNM_045	20.4893	-99.2142	-4.75886	-0.276023	-0.667429	NA	183	173	2479	209	149	386	70	31	3899	-970	1705	1
USNM_134_135_136_137	20.5049	-86.926	-9.62821	-3.56968	-0.855877	-0.258462	261	91	1607	278	237	1396	52	240	7248	-987	7	1
AMNH_061	20.5776	-104.433	2.11533	6.26577	-0.052027	NA	162	143	1970	184	150	1064	105	61	8425	-842	1937	37
AMNH_052_53_54	20.6541	-102.329	4.44114	-3.00936	-0.167429	-0.23125	179	162	2455	208	144	950	107	35	7636	-889	1985	16
AMNH_059_60	20.6574	-104.51	3.79114	0.223977	-0.217429	NA	230	167	2461	256	204	882	107	39	8220	-839	1003	35
AMNH_055_57	20.6598	-103.347	-0.651333	0.699105	-0.518694	NA	197	161	2462	225	162	939	111	37	2014	-359	1546	1
USNM_047_48	20.7187	-103.365	1.12824	3.19487	-0.0097278	NA	196	163	2431	224	161	952	111	39	3350	-491	1533	1
USNM_081	20.7369	-97.8519	4.54114	6.02398	0.832571	0.26875	234	112	3257	267	187	1616	65	147	8250	-800	316	20
USNM_050	20.7619	-104.85	-6.58467	1.66577	-0.352027	NA	185	147	1944	205	163	1286	110	57	7809	-791	1480	36
USNM_068	20.7978	-105.221	-5.68467	0.165772	-0.552027	-0.167532	257	125	2415	284	225	1166	118	37	8039	-814	33	10
CNMA_013	20.8422	-100.744	0.215333	0.565772	-0.352027	NA	169	151	2296	195	136	632	91	39	6893	-1034	2217	33
USNM_138	20.9335	-89.0166	-12.6589	0.423977	-0.367429	-0.03125	261	127	2060	281	232	1059	71	96	8249	-837	14	19
USNM_129_131_AMNH_091	20.9747	-89.6131	-2.57606	-2.78149	-0.323828	-0.23125	258	102	1930	276	230	958	70	95	4578	-576	11	1
CNMA_014	21.1403	-100.066	-0.658857	2.52398	-0.167429	NA	202	171	2647	230	163	471	80	28	4315	-986	1572	2
USNM_070_71	21.1668	-105.227	-8.75886	1.22398	-0.567429	0.56875	257	120	2635	287	222	1401	124	43	9418	-1418	15	13
MALH_008	21.2846	-99.4701	-2.68467	1.26577	-0.352027	-0.367532	227	145	3356	263	180	964	91	56	7533	-882	880	40
MALH_001	21.3325	-99.4364	4.84114	0.323977	-0.0674286	-0.03125	206	149	2855	235	166	894	87	50	8124	-916	1439	32
USNM_072	21.3849	-105.191	4.64114	6.82398	0.732571	0.56875	255	117	2757	286	219	1555	125	42	8679	-915	51	67
USNM_065	21.5031	-104.898	-9.88467	-2.43423	-0.852027	NA	213	143	2284	238	181	1289	119	59	3148	-666	942	2
USNM_093_94_95	22.4003	-97.9351	-1.46746	4.70458	0.137705	0.589989	239	86	3366	275	191	1002	91	77	6219	-962	16	11
CNMA_043_44_47	22.4382	-99.3057	-3.17606	5.25184	0.00950579	0.350609	235	117	3760	273	182	1278	85	66	8127	-846	260	26
USNM_066	22.501	-105.363	-3.38467	1.46577	-0.352027	NA	248	118	2641	277	212	1337	121	68	7936	-857	30	10
USNM_101	22.6424	-104.102	-3.95886	4.02398	-0.467429	-0.23125	215	158	3300	251	168	493	100	51	4621	-930	1221	1
CNMA_048	22.8213	-105.788	-9.28467	2.76577	0.147973	-0.0675325	249	108	3019	284	209	865	93	67	7038	-938	16	11
AMNH_073_74_75_82_83_84_85_USNM_086	22.8352	-105.787	4.32824	2.96987	-0.0722278	-0.0493912	250	108	3035	284	209	864	93	68	4975	-938	21	12
USNM_085	23.2697	-106.433	1.91533	6.16577	-0.052027	-0.467532	247	97	3175	283	207	785	121	40	7005	-957	15	8
AMNH_086	24.0829	-99.1103	-4.08467	0.365772	-0.652027	NA	237	138	4686	290	172	727	72	51	5946	-1003	195	9
USNM_158	24.5679	-81.7614	-0.784667	-4.23423	0.247973	0.132468	252	60	2904	286	212	1004	46	148	3475	-1408	1	0
CNMA_051	24.6095	-98.7222	-3.28467	0.265772	-0.452027	-0.267532	206	134	4228	254	148	869	69	90	8582	-1037	829	39
USNM_084	24.7907	-107.387	0.641143	5.92398	0.332571	0.06875	252	155	3832	296	203	661	116	63	4089	-694	112	2
USNM_036	24.8123	-106.739	0.741143	4.22398	-0.167429	NA	239	154	3359	276	193	1063	109	110	8448	-766	633	31
USNM_172	25.4939	-80.4828	1.84114	-2.87602	0.232571	NA	236	98	3241	274	193	1548	60	134	6846	-821	8	8
MVZ_007	25.5256	-100.308	-7.18467	-1.83423	-0.352027	0.932468	151	136	2607	181	115	593	79	45	7641	-824	1854	44
CNMA_035	25.6733	-100.342	2.44114	1.72398	-0.267429	NA	219	122	4997	277	149	574	76	45	2776	-392	559	2
USNM_061_64	25.7189	-100.405	-5.77176	1.39487	-0.559728	NA	199	125	4936	257	129	402	85	35	5737	-625	889	3
USNM_144_147_148_149	25.9	-97.4725	-3.70321	2.20532	-0.505877	-0.349391	231	98	4803	288	165	686	55	107	4895	-832	13	5
AMNH_096	27.1812	-81.3507	-2.08467	-2.13423	-0.252027	-0.667532	222	133	4125	270	165	1253	59	159	7058	-998	45	17
USNM_083	27.2025	-107.712	-3.58467	-1.13423	-0.252027	-0.567532	169	180	4280	221	113	968	99	128	7395	-914	1577	24
MVZ_008_9_11_12	27.225	-109.259	-4.62176	2.81987	-0.390494	-0.199391	253	175	5008	313	188	525	120	53	6405	-1008	79	15
AMNH_097_98	27.2673	-81.3641	6.52824	-4.15513	0.740272	-0.0493912	223	132	4152	272	165	1223	58	160	6784	-1029	32	11
USNM_154_155	27.3247	-81.0348	-2.00886	-1.47602	0.0825714	-0.38125	225	123	4051	273	169	1188	55	152	8574	-1008	14	66
USNM_153	27.3549	-81.0438	-6.05886	-4.17602	-0.267429	-0.23125	225	124	4042	272	169	1194	56	153	7834	-1027	18	36
USNM_157	27.3885	-81.0379	1.31533	-0.634228	0.547973	NA	225	123	4087	273	169	1198	56	155	7759	-1046	17	9
USNM_156	27.4337	-81.0345	-3.85886	4.32398	0.732571	0.16875	225	123	4063	272	169	1206	55	156	8161	-1041	19	20
AMNH_079	27.7915	-82.6411	12.8153	3.46577	0.647973	NA	225	94	4551	278	162	1227	55	198	5839	-838	14	0
USNM_146	27.7917	-97.3955	-0.0588571	0.0239773	-0.0674286	-0.03125	221	97	5585	287	144	793	45	134	1936	-808	12	0
USNM_145	27.8368	-97.4925	-5.25886	2.12398	-0.367429	-0.53125	220	105	5676	287	142	798	45	133	7509	-900	5	0
USNM_163_164_171	27.9662	-81.452	-5.76746	-0.495425	0.204372	-0.0100108	224	127	4307	275	165	1220	53	184	7194	-1006	24	28
USNM_190	28.7035	-95.9624	-0.0846667	-4.23423	-0.352027	0.532468	212	95	5902	283	131	1145	32	228	7507	-1146	5	28
USNM_159_161	28.7935	-81.0278	0.641143	-0.0260227	0.0325714	NA	217	107	4574	271	155	1294	45	196	8991	-998	8	61
AMNH_094	28.7958	-82.5898	-1.88467	-6.83423	-0.052027	-0.267532	212	129	4869	270	147	1363	48	242	8666	-988	15	55
USNM_192	28.9042	-96.1831	-1.28467	-2.13423	-0.252027	0.132468	208	106	6009	280	126	1115	28	221	7988	-1081	14	33
USNM_087	29.079	-110.947	9.61533	11.1658	1.34797	1.03247	242	157	5870	314	167	284	114	50	2768	-771	211	1
USNM_165	29.1553	-81.8614	1.31533	-2.93423	0.747973	0.0324675	209	127	5000	269	142	1288	40	232	7912	-1010	24	57
USNM_142	29.2425	-100.791	-6.85886	1.42398	-0.167429	-0.43125	213	129	6891	296	120	486	51	55	6435	-1065	266	12
USNM_150_151_152	29.3014	-100.418	3.79921	4.77124	0.471039	0.0233225	202	136	6793	283	109	555	43	73	5314	-1144	347	6
USNM_141	29.3631	-100.929	-6.25886	-0.376023	-0.867429	0.36875	212	129	6888	295	119	432	51	49	3638	-963	297	1
AMNH_035_36_38	29.4464	-98.4723	-0.16746	-0.562091	0.404372	0.489989	206	121	6590	288	120	696	33	126	5525	-649	215	4
AMNH_092_93	29.639	-82.3221	0.915333	-5.33423	-0.302027	-0.567532	204	128	5315	268	133	1327	41	275	7919	-873	30	24
USNM_181	29.7022	-92.2117	-2.85886	-4.97602	-0.0674286	-0.03125	198	101	6135	270	113	1541	25	347	8753	-1132	1	38
USNM_182	29.7065	-91.1955	-7.65886	-0.376023	-0.0674286	-0.13125	201	108	5888	272	121	1624	24	381	7592	-901	3	10
USNM_261	29.953	-98.8039	-2.58467	-0.134228	0.547973	0.0324675	191	136	6625	271	101	792	32	134	7166	-1098	408	8
MVZ_014	30.089	-94.144	2.61533	-3.73423	0.547973	NA	197	116	6336	274	111	1425	17	336	5914	-770	13	30
USNM_179	30.2611	-91.991	-0.884667	-2.73423	0.147973	0.232468	196	113	6204	271	113	1492	14	386	8540	-862	17	64
USNM_186_187	30.3116	-89.339	-2.12176	-1.65513	-0.259728	0.0324675	194	107	6094	268	113	1572	17	411	7510	-1123	10	9
AMNH_099	30.3158	-84.135	0.715333	-3.33423	0.047973	0.132468	196	132	5899	268	118	1482	28	343	8733	-991	19	69
AMNH_100	30.4348	-84.2718	7.94114	-7.27602	0.532571	0.46875	194	131	5965	267	115	1500	26	352	6504	-812	56	8
USNM_262_263	30.7527	-99.2346	4.52824	-1.90513	0.540272	0.0506088	181	148	7139	268	84	665	37	97	6692	-1182	476	3
AMNH_076_77	30.779	-84.9508	0.765333	-3.28423	-0.00202703	-0.317532	194	134	6143	268	111	1418	22	359	8578	-1017	36	58
AMNH_080	30.8403	-83.9658	12.1153	-3.23423	0.447973	0.932468	193	135	6066	267	112	1368	24	345	7528	-922	89	7
AMNH_078	30.8618	-82.2584	3.01533	-4.53423	0.747973	NA	196	137	5854	267	117	1318	34	284	9624	-881	45	60
AMNH_081	30.8734	-83.8423	8.74114	-2.67602	0.232571	0.56875	194	135	6074	267	112	1336	24	336	9006	-905	68	51
USNM_167	30.9073	-86.5165	-1.45886	-4.07602	0.232571	0.16875	187	128	6345	264	102	1555	20	385	8422	-991	60	57
USNM_177	30.9275	-82.2959	3.34114	-0.876023	0.432571	NA	195	136	5924	267	115	1314	33	289	8679	-867	50	82
USNM_176	31.7244	-81.4747	-0.884667	-4.43423	-0.552027	-0.167532	192	116	6238	268	110	1260	34	261	8786	-982	10	72
USNM_189	32.4337	-80.6741	-2.68467	-4.83423	-0.352027	0.132468	186	111	6506	266	99	1274	34	259	4553	-908	8	13
USNM_253	32.7851	-79.8614	-8.95886	-5.37602	-0.367429	NA	187	95	6480	267	100	1248	32	252	7605	-803	11	29
USNM_265	33.9628	-98.7754	8.11533	-0.534228	1.14797	0.432468	174	145	8595	282	60	711	40	98	8181	-1218	316	11
USNM_194	33.9951	-87.099	-1.55886	-5.37602	-0.0674286	NA	156	136	7523	250	56	1462	18	415	7866	-996	192	13
MVZ_029	34.056	-117.182	8.11533	-3.83423	0.147973	-0.367532	178	163	5383	252	115	313	84	166	2999	-821	425	7
USNM_240_241_242_243_2444	34.1517	-98.2789	6.65598	-4.66766	0.355652	0.0214935	172	142	8531	280	59	782	39	110	7566	-1214	277	8
USNM_196	34.4968	-91.5613	2.14114	-1.67602	0.532571	0.56875	167	117	8031	267	59	1265	20	327	7057	-944	60	8
USNM_250	34.6883	-98.4495	-0.884667	-2.73423	0.447973	-0.0675325	164	133	8672	274	50	761	46	93	8037	-1122	367	17
USNM_251	34.7221	-98.7003	5.61533	1.06577	1.04797	NA	156	140	8843	267	38	739	40	98	5859	-1150	504	32
USNM_246	34.7678	-98.5921	0.141143	-7.27602	0.332571	0.16875	158	137	8791	269	42	746	42	96	7822	-1151	455	21
USNM_239	34.8473	-95.5668	-1.28467	-3.33423	-0.052027	0.232468	164	129	8207	266	53	1165	28	193	7028	-1096	225	11
USNM_193	34.8518	-87.5278	-2.08467	-3.63423	0.047973	NA	154	133	7739	250	51	1396	18	391	8183	-936	181	44
AMNH_025_26_27	35.2212	-75.6867	6.34114	-3.30936	0.332571	NA	170	86	6719	253	83	1396	16	333	7620	-2161	3	54
USNM_234	35.3719	-77.964	1.14114	-2.47602	-0.567429	-0.03125	161	121	7365	254	64	1240	25	276	7971	-804	30	37
AMNH_029_30_31	35.4013	-78.8157	4.25727	0.185174	0.409506	0.0445617	157	127	7467	251	58	1169	18	276	7462	-882	41	7
AMNH_034	35.8097	-83.6374	-3.58467	-2.93423	0.047973	NA	132	135	7577	227	31	1282	14	330	8499	-874	402	71
MVZ_036	35.903	-98.4843	6.74114	-8.37602	NA	NA	150	136	9117	266	30	722	46	75	5485	-1210	466	2
MVZ_035	36.0816	-80.2506	-2.15886	-2.67602	0.0325714	NA	147	127	7776	245	44	1134	10	272	6935	-726	245	8
USNM_255	36.2372	-88.0877	0.315333	-2.53423	0.247973	0.332468	143	133	8265	245	30	1342	15	352	7927	-939	123	55
USNM_257	36.3561	-83.4153	2.84114	-4.77602	0.132571	NA	127	133	7789	225	24	1241	14	320	8876	-886	479	39
USNM_227	36.5073	-92.245	10.4411	2.22398	1.23257	0.46875	138	141	8608	245	21	1102	18	221	7771	-1018	228	22
USNM_258	36.5385	-87.3601	3.84114	-2.57602	-0.0674286	NA	143	134	8442	249	30	1271	16	340	7017	-826	137	2
USNM_228	36.6681	-93.3347	1.61533	-6.53423	0.247973	NA	131	135	8551	237	16	1116	21	195	7939	-968	388	39
MVZ_026	36.9841	-120.534	9.74114	-2.87602	0.432571	NA	165	158	6444	246	83	226	82	116	7739	-866	37	18
MVZ_040_41	37.1041	-76.4641	1.07824	-4.80513	-0.459728	-0.467532	148	100	7765	246	46	1121	16	261	8120	-799	15	30
USNM_270_274	37.2282	-80.3905	-3.55886	-4.07602	0.382571	-0.48125	112	132	7693	208	6	997	11	210	9120	-881	637	74
USNM_275	37.393	-80.5598	1.11533	-1.43423	-0.052027	NA	91	121	7583	185	-11	1098	11	232	8772	-858	1035	80
USNM_213	37.6801	-84.4181	5.81533	-8.23423	0.347973	NA	129	120	8351	233	17	1207	14	279	8296	-917	292	15
MVZ_022	37.8575	-122.232	0.915333	-4.23423	0.447973	NA	140	106	3437	184	96	695	88	368	6421	-663	248	11
MVZ_016	37.8634	-122.215	NA	-3.87602	-0.0674286	NA	140	111	3764	189	94	721	86	380	7673	-709	337	18
MVZ_023	37.8701	122.245	2.01533	-6.53423	NA	-0.167532	141	103	3342	183	98	690	87	363	8236	-706	205	24
MVZ_015	37.8725	-122.245	-4.88467	-4.73423	0.247973	NA	141	103	3342	183	94	690	87	387	8236	-706	205	24
MVZ_018	37.8761	-122.255	NA	-2.77602	0.832571	NA	140	104	3356	182	101	705	88	348	6933	-806	223	19
MVZ_019	37.8788	-122.266	NA	0.623977	0.632571	NA	141	95	3016	177	103	644	89	327	6543	-806	119	7
MVZ_020	37.8905	-122.274	6.71533	-4.53423	0.047973	NA	142	93	2964	177	102	625	88	344	6021	-806	100	3
USNM_224_225	38.0678	-75.568	1.59114	-6.62602	0.132571	0.26875	137	103	7899	237	34	1049	14	246	6970	-917	4	4
USNM_266	38.0911	-75.2049	6.04114	-5.97602	0.432571	0.36875	136	99	7765	234	35	1067	14	253	4965	-1866	3	12
USNM_205	38.3622	-87.7109	-0.558857	NA	-0.367429	-0.03125	129	117	9157	243	6	1112	18	233	8761	-866	129	48
USNM_276	38.4292	-82.3368	-2.38467	-5.93423	0.247973	NA	121	131	8316	224	9	1094	15	240	9070	-788	238	77
USNM_273	38.7072	-77.156	0.441143	-8.37602	-0.367429	-0.03125	131	115	8411	236	19	997	11	224	7944	-764	26	42
USNM_268	38.8048	-77.0469	-4.05886	-7.87602	-0.467429	NA	133	114	8483	241	21	1013	12	224	4018	-655	13	4
MVZ_039	38.8822	-77.1714	-5.85886	-5.17602	0.0325714	NA	127	117	8525	235	14	1033	11	224	7901	-634	99	10
USNM_280	38.9478	-77.4908	8.54114	1.42398	0.632571	NA	125	124	8507	233	12	1005	11	214	7505	-804	93	3
MVZ_031	38.9633	-95.235	-1.15886	-6.27602	-0.267429	-0.33125	128	117	9674	248	-1	961	45	93	6226	-888	274	0
USNM_215	38.9771	-77.1573	7.04114	-3.27602	0.232571	-0.13125	129	120	8548	237	15	1020	12	219	8741	-688	53	56
USNM_278	39.0567	-78.9601	5.34114	-1.57602	0.532571	0.26875	114	140	8296	218	1	893	17	171	8475	-905	263	0
AMNH_003_5_6	39.179	-96.5979	3.17824	-5.43542	0.437705	-0.243344	120	130	10015	246	-14	861	52	70	7288	-985	345	5
USNM_237	39.2909	-81.9765	4.71533	-7.53423	0.247973	NA	112	129	8638	219	-5	1028	17	212	9022	-821	250	82
MVZ_025	39.4184	-122.163	14.1153	-6.63423	0.247973	NA	159	154	6266	238	81	456	83	246	6861	-1227	25	24
MVZ_037	39.4397	-83.8367	-6.25886	-15.676	0.0325714	-0.33125	111	109	8962	222	-10	1039	19	212	8279	-865	310	30
USNM_206	40.2906	-85.4233	8.14114	-1.97602	0.432571	NA	100	111	9578	218	-30	957	20	178	8639	-838	277	1
AMNH_001	40.3808	-84.8649	2.31533	-0.134228	0.547973	NA	98	114	9501	215	-30	933	22	169	7628	-872	296	0
USNM_207	40.4298	-86.9533	-1.08467	-5.03423	-0.252027	NA	102	115	9687	220	-30	946	24	162	8384	-841	204	21
MVZ_033	40.5105	-96.1637	3.11533	-5.13423	-0.352027	NA	107	134	10407	237	-33	819	48	70	7319	-922	329	1
MVZ_032	40.645	-97.4503	6.23006	-6.82346	0.284375	NA	NA	NA	NA	NA	NA	NA	NA	NA	6671	-856	491	7
AMNH_011	40.6707	-74.2088	9.34114	-2.67602	0.332571	-0.43125	118	105	8784	229	2	1181	11	260	3739	-396	11	14
AMNH_012	40.7168	-74.0114	3.91533	-6.03423	0.247973	-0.367532	121	88	8735	232	7	1146	10	256	1897	-250	6	0
USNM_208	40.7461	-86.171	10.5411	-8.37602	0.0325714	-0.43125	99	115	9654	218	-33	949	22	170	8268	-844	196	11
USNM_209	40.8402	-85.7313	8.34114	-8.57602	0.532571	-1.13125	97	118	9564	215	-34	965	21	174	8046	-859	219	24
MVZ_034	40.8619	-96.6701	2.71533	-6.23423	-0.152027	NA	107	126	10651	241	-36	749	52	59	5950	-809	347	1
AMNH_018	40.9587	-72.9922	2.81533	-4.03423	0.447973	-0.467532	108	97	8370	214	-1	1153	8	281	8342	-1360	38	23
AMNH_016_17	41.1181	-73.7984	0.0411429	-6.77602	-0.567429	-0.38125	102	104	8808	213	-12	1245	8	279	9009	-867	149	71
AMNH_024	41.2737	-73.7743	5.04114	-5.27602	0.432571	-0.33125	100	111	8849	212	-17	1207	8	270	9072	-830	148	38
AMNH_021	41.2927	-73.6692	11.2153	-0.634228	1.24797	NA	102	114	8825	213	-15	1188	8	269	8593	-862	97	53
AMNH_013_15	41.3322	-73.9871	2.29114	-6.57602	0.132571	-0.43125	105	115	9020	219	-17	1165	9	258	7577	-923	48	78
AMNH_007	41.9376	-85.0112	6.91533	-7.03423	0.347973	-0.467532	86	111	9520	204	-41	896	23	151	7061	-887	295	1
AMNH_014	42.6673	-74.3193	11.3411	-3.77602	0.132571	NA	80	119	9466	198	-47	985	14	200	7418	-954	185	62

## Sheet: Pigmentation_average
ID	LAT	LONG	DTLR	ERPIGBR	MTPIGR	MTPIGBR	FL	ChL	TeL	AVGL	Bio1	Bio2	Bio4	Bio10	Bio11	Bio12	Bio15	Bio19	NDVIMAX	ROUGH	ELEV	TREECOV
USNM_123_124_125_126_127	11.3247	-85.7074	0.621599	1	0.647619	1	43.562	57.984	35.7	37.926	265	102	792	277	256	1646	80	492	NA	NA	NA	NA
USNM_103_104_105_106_107_108_109_110_111_112_113	12.276	-86.3659	0.538274	0.984594	0.791429	1	43.5055	60.6882	38.0882	39.2564	275	104	935	288	264	1116	104	321	NA	NA	NA	NA
USNM_114_121_122	12.4172	-86.6451	0.563735	0.970588	1	1	46.15	64.3033	37.34	40.25	268	109	871	280	258	1390	107	68	NA	NA	NA	NA
USNM_116_118_119	12.5503	-87.1661	0.692623	1	0.916667	1	38.7233	64.3467	36.83	36.6133	274	114	933	286	262	1626	97	91	NA	NA	NA	NA
USNM_120	13.0188	-85.8355	0.656069	1	1	1	34.02	64.04	22.39	36.47	202	101	871	212	190	1808	62	277	9160	-692	1029	31
MVZ_053_54	13.2333	-88.3667	0.586876	1	1	1	51.04	67.355	34.79	41.47	261	114	782	272	254	1764	98	337	9155	-833	18	65
MVZ_048_50_51_52	13.3167	-88.0667	0.511921	1	0.808824	1	48.3525	68.84	42.525	36.995	258	116	748	268	256	1831	99	346	8804	-897	253	0
MVZ_046	13.7667	-88.2167	0.420366	1	1	1	45.6	69.25	43.42	37.92	193	113	892	203	184	2222	91	17	8621	-776	1258	68
USNM_006	13.9753	-91.0565	NA	1	1	1	39.02	66.93	33.83	43.03	275	107	760	285	266	1599	89	8	9441	-937	9	24
AMNH_044	14.0822	-87.2143	0.565327	1	0.764706	1	49.06	62.26	53.55	39.69	219	111	1308	232	201	1010	82	67	3922	-783	976	1
AMNH_049	14.1397	-87.9082	0.596045	1	0.714286	1	36.96	69.27	30.74	31.64	170	103	1467	185	151	1701	80	66	8314	-832	1797	54
AMNH_045	14.2461	-87.9555	0.639241	1	1	1	36.91	70.37	22.35	27.31	198	114	1387	214	180	1449	84	43	8313	-871	1319	19
AMNH_039_40_42_43	14.284	-87.2577	0.565792	0.958333	0.616667	1	38.175	66.1475	34.5575	37.07	225	117	1428	241	204	1182	70	117	7344	-960	866	21
MVZ_043	14.3833	-89.1333	0.537267	1	0.692308	1	40.63	60.67	26.14	36.8	132	92	1069	142	120	2359	72	131	8679	-844	2504	74
AMNH_050_51	14.5853	-88.5848	0.491725	1	0.554762	1	39.695	59.71	35.46	31.425	224	123	1534	241	202	1261	74	107	6851	-898	815	29
USNM_019	15.0159	-92.3932	0.565104	1	1	1	38.71	66.53	34.4	30.41	274	131	768	285	264	2496	85	125	8201	-768	56	24
USNM_008	15.4324	-88.0112	NA	1	1	1	38.19	72.76	31.82	42.72	267	104	1421	281	246	1489	37	328	7232	-782	46	3
USNM_007	15.5013	-88.0286	0.579787	1	1	1	38	56.16	31.54	39.65	264	103	1472	278	242	1382	38	293	4084	-670	98	0
USNM_005	15.8013	-91.7528	0.558824	1	1	1	46.61	58.35	42.14	35.73	228	135	1108	240	213	1611	89	113	7874	-871	840	32
USNM_018	16.2044	-92.088	0.65343	1	1	1	37.24	48.71	31.32	35.94	186	139	1209	199	169	1006	86	34	7117	-922	1589	14
AMNH_062_64_65_66	16.2225	-94.856	0.540259	1	0.911765	1	48.3875	63.6975	41.88	43.585	273	102	1367	288	254	1216	113	10	7031	-1538	6	6
AMNH_063	16.3184	-94.754	0.76161	1	1	1	40.84	64.34	28.49	38.88	271	103	1442	286	250	1066	112	6	6845	-1207	40	2
USNM_076_78	16.3187	-95.2409	0.527753	1	1	1	47.87	66.085	36.715	45	276	108	1359	290	256	860	114	10	5139	-920	42	2
AMNH_069_72	16.3326	-95.2227	0.782237	1	1	1	45.645	63.735	43.25	47.855	276	107	1390	290	256	870	114	11	5533	-930	45	0
AMNH_071	16.3328	-95.2277	0.643979	1	1	1	42.98	64.27	36.74	31.56	276	107	1385	291	256	866	113	11	3896	-930	53	0
USNM_020	16.3474	-92.5492	0.618497	1	1	1	44.07	66.95	37.73	44.1	236	149	1363	253	211	1374	97	36	6951	-858	794	16
CNMA_038	16.3669	-94.1944	0.715596	1	1	1	29.45	66.74	22.23	37.58	267	120	1005	279	254	1608	106	12	7204	-822	59	12
AMNH_070	16.4175	-95.3327	0.580537	1	1	1	30.76	67.46	27.44	34.46	276	116	1431	291	256	849	117	8	8507	-891	78	35
AMNH_067_68	16.4266	-95.4102	0.597508	1	1	1	34.7	63.16	34.545	41.565	269	122	1483	285	247	748	115	4	8611	-977	234	39
CNMA_015	16.69	-99.6256	0.517134	1	1	1	42.61	64.72	33.41	39.47	202	171	2647	230	277	471	80	15	NA	NA	NA	NA
USNM_014_AMNH_048	16.7284	-92.6271	0.62869	0.980488	0.565611	1	35.88	66.81	35.435	37.085	151	130	1198	162	133	1208	72	75	6884	-813	2148	3
USNM_012	16.7633	-93.3643	0.506135	NA	NA	NA	36.69	68.6	38.07	33.77	226	125	1601	243	209	962	91	35	8212	-867	989	27
CNMA_016	16.8272	-99.8047	0.5	0.945946	1	1	44.2	66.67	26.86	38.37	284	111	721	292	274	1116	110	18	8751	-776	15	38
USNM_013	16.8593	-93.4122	0.498507	1	1	1	26.64	59.17	25.66	36.96	228	120	1707	245	204	914	83	57	7551	-794	922	34
USNM_037_38_39	16.8831	-99.8879	0.616054	1	1	1	39.1633	56.2967	36.3133	41.03	277	115	704	285	261	1140	111	21	6752	-806	271	16
USNM_077	16.9613	-95.0964	0.576087	1	1	1	38.93	56.97	28.36	33.35	244	107	1715	265	219	1594	89	109	7785	-786	260	36
CNMA_017	16.9725	-100.015	0.588542	1	1	1	32.55	67.07	35.96	43.24	284	110	752	293	273	999	111	14	8625	-909	17	43
AMNH_047	17.1551	-92.9	0.542636	1	0.764706	1	38.37	69.74	28.55	36.32	180	119	1328	192	160	2181	50	325	8190	-804	1675	17
USNM_015_16_17	17.2801	-92.3142	0.533139	1	1	1	32.6033	60.4433	29.59	35.4933	199	118	1378	211	173	3519	55	521	8866	-721	1399	26
AMNH_088_89	17.4381	-95.0234	0.505809	1	1	1	40.01	60.56	29.605	35.82	253	106	2138	278	223	2345	85	193	8141	-882	28	18
MALH_014	17.4748	-100.173	0.5	1	0.642857	1	34.47	59.58	23.96	32.05	152	101	737	162	149	1756	99	51	8465	-797	2655	59
MALH_015	17.5551	-99.6856	0.483709	1	0	1	41.37	63.67	32.46	49.16	182	110	918	195	171	1498	102	37	8269	-855	2250	73
USNM_088_89	17.5588	-92.9439	0.493796	1	1	1	33.96	58.585	43.075	41.225	259	115	1983	278	230	3614	44	756	6071	-682	41	9
USNM_075	17.7984	-96.9627	0.6675	1	1	1	45.44	62.7	41.57	41.54	251	137	2370	280	214	500	103	12	6863	-882	611	10
USNM_100	17.9842	-94.5501	0.646552	1	1	1	40.36	70.76	38.79	42.26	260	94	2108	283	230	2410	68	320	4627	-733	21	6
USNM_041	18.0781	-101.991	0.508772	1	1	1	50.83	64.67	42.15	43.44	273	132	1167	285	257	950	107	31	7837	-875	127	20
USNM_073_074	18.0905	-96.1318	0.44385	1	1	1	43.875	59.185	38.31	36.03	252	98	2393	278	219	2375	92	133	5357	-782	31	6
CNMA_037	18.1336	-97.8253	0.503513	1	1	1	41.72	72.9	37.82	40.38	206	170	1958	228	178	584	101	14	6026	-975	1595	9
CNMA_020	18.3153	-99.93	0.524272	1	1	1	34.01	69.04	35.87	38.42	236	144	1696	260	218	1038	111	17	8183	-842	1225	8
MALH_011	18.3351	-94.7507	0.515068	1	0.214286	1	52.07	64.38	28.29	36.31	244	91	1948	264	216	2490	65	362	8867	-838	224	38
AMNH_041	18.4007	-88.3899	0.517241	1	1	1	34.78	58.42	33.03	35.34	254	93	1570	270	232	1354	58	238	7632	-943	9	22
USNM_099	18.429	-95.1171	0.48329	1	0.666667	1	36.2	61.61	24.08	33.99	236	92	2180	261	206	2306	72	255	7155	-848	396	34
USNM_010_11	18.4493	-90.1065	0.569371	1	1	1	40.12	66.055	37.575	41.395	253	121	2172	276	224	1204	66	120	9616	-819	202	81
MVZ_010	18.5322	-95.3072	0.454268	1	1	1	50.06	68.51	43.61	37.11	243	92	2184	268	213	2778	65	420	7933	-826	296	12
CNMA_053_55_56_57_58	18.6192	-95.6612	0.539184	1	0.925	1	36.538	60.694	33.636	39.386	267	88	1784	285	241	1751	75	185	8010	-920	3	18
MALH_004	18.7388	-99.444	0.5	1	1	1	34.38	72.52	31.74	40.48	241	169	1883	265	215	903	105	24	8461	-876	1049	27
AMNH_087	18.7752	-95.7594	0.576227	1	0.533333	1	41.01	64.15	27.12	32.11	261	84	2034	281	231	1681	82	129	7800	-1398	50	9
CNMA_031	18.8517	-99.4122	0.570388	1	1	1	40.73	61.42	40.08	40.92	215	144	1564	237	197	1094	103	42	8596	-841	1457	49
USNM_096	18.8552	-97.0913	0.475362	NA	1	1	40.69	61.18	43.5	27.61	195	115	1943	216	168	2061	82	127	4785	-633	1218	1
CNMA_028	18.8678	-99.4403	0.651934	1	1	1	42.83	61.92	41.85	38.09	209	141	1513	230	193	1077	103	41	8277	-844	1572	39
USNM_060	18.8786	-99.0589	0.648387	1	1	1	45.1	64.78	35.13	38.43	233	166	1776	256	209	926	100	35	7381	-781	1217	5
MALH_009	18.9016	-95.9557	0.41039	1	1	1	36.3	65.51	45.93	39.23	261	86	2172	282	228	1542	93	86	8458	-1075	17	66
USNM_031_32_33_35	18.9405	-103.96	0.532382	1	1	1	39.1825	61.8175	38.3925	40.18	264	127	1750	284	241	762	102	29	7255	-869	46	8
USNM_022_23_24_26_28_29_30	19.0526	-104.32	0.52026	1	1	1	39.9014	60.6771	37.85	34.0086	265	111	1609	283	244	987	113	32	5547	-917	44	54
USNM_059	19.0578	-101.607	0.743827	1	1	1	38.11	68.12	50.07	40.57	201	155	1463	221	172	1184	110	33	8264	-906	1552	48
CNMA_026	19.0706	-99.3308	0.51752	1	1	1	33.6	64.28	36.51	27.22	110	143	1377	126	93	1318	95	53	8176	-986	3199	80
USNM_053	19.1158	-98.7602	0.814016	1	1	1	41.73	62.37	36.64	38.75	142	162	1610	160	119	947	93	26	8447	-845	2492	15
MVZ_005	19.1477	-101.442	0.479495	1	1	1	37.35	55.11	27.55	29.64	233	160	1639	256	215	1086	113	27	8400	-858	1192	22
MVZ_006	19.2095	-101.457	0.571429	1	0.8125	1	41.1	68.61	35.27	42.69	208	161	1683	231	181	1143	111	32	8394	-844	1482	33
USNM_080	19.2874	-98.4306	0.559172	1	1	1	43.16	65.43	41.41	45.65	155	161	1867	175	127	698	86	22	4036	-849	2248	2
CNMA_003_4	19.3125	-99.1881	0.584007	1	0.875	1	38.015	65.16	35.885	37.29	156	172	2133	179	126	847	95	24	6809	-330	2318	35
CNMA_008	19.3178	-99.1841	0.658098	1	0.8125	1	31.14	59.31	25.01	34.34	156	172	2118	179	126	839	96	24	6365	-309	2309	14
CNMA_009	19.3207	-99.1777	0.614907	1	0.733333	1	26.29	69.01	28.39	32.81	158	172	2084	180	128	830	95	24	3538	-288	2294	12
MALH_002_6	19.3216	-99.1902	0.543204	1	1	1	40.24	58.845	28.73	31.16	156	172	2118	179	126	839	96	24	6365	-309	2309	14
CNMA_010	19.3225	-99.1947	0.557841	1	1	1	28.9	54.67	34.05	31.87	156	172	2119	179	127	847	95	30	6284	-309	2328	12
CNMA_002	19.3234	-99.1852	0.494318	1	1	1	35.47	67.04	31.25	35.11	156	172	2118	179	129	839	96	24	6365	-309	2309	14
CNMA_011	19.3253	-99.1892	0.579515	1	1	1	39.66	71.29	38.26	33.85	158	172	2083	181	127	832	95	30	4767	-309	2291	4
MALH_010_13	19.3302	-96.6281	0.56321	1	1	1	51.155	62.33	35.355	40.13	247	117	2261	271	214	980	95	54	8470	-857	256	40
CNMA_005_6	19.3326	-99.1855	0.588335	1	1	1	32.18	58.76	25.3	33.54	158	172	2083	181	129	832	95	23	4767	-309	2291	4
USNM_097	19.4172	-97.0073	0.491484	1	0.705882	1	49.06	65.96	35.48	37.66	188	103	2089	210	157	1875	69	168	8042	-702	1295	27
CNMA_024	19.4817	-98.8235	0.489749	1	1	1	41.08	60.11	35.54	45.26	143	177	1965	164	117	626	81	23	5585	-835	2468	3
USNM_046	19.7047	-103.447	0.58	1	1	1	40.87	58.84	40.64	39.98	180	149	1918	201	164	776	97	47	8249	-820	1700	28
AMNH_058	19.71	-103.471	0.501629	1	1	1	50.58	64.38	46.66	46.1	194	150	1932	215	165	614	97	49	4960	-827	1514	4
USNM_055_56_57	19.8062	-100.891	0.564074	1	1	1	39.5433	60.35	35.9833	38.4167	175	158	2204	201	147	748	102	30	7302	-882	1904	13
USNM_139	19.8432	-90.5025	0.535928	1	0.416667	1	41.79	65.45	39.85	42.28	264	98	2084	285	234	1069	81	75	5866	-812	22	0
CNMA_054	20.0162	-97.1416	0.407895	1	0.75	1	50.66	68.66	56.12	49.22	239	115	2694	266	199	1441	47	218	7912	-814	171	12
CNMA_040	20.1066	-97.3564	0.467262	1	0.705882	1	36.99	69.35	23.3	37.22	225	109	2961	254	188	2281	49	290	8525	-849	379	7
USNM_042_43	20.1318	-98.7407	0.494125	1	1	1	40.19	56.52	34.37	39.735	140	137	1672	161	107	615	71	65	1968	-887	2460	2
USNM_044	20.1382	-98.6736	0.486154	1	1	1	42.22	54.07	39.27	33.1	121	128	1561	140	97	870	68	73	4630	-944	2746	1
USNM_054	20.2799	-102.474	0.610119	NA	NA	1	44.18	64.72	45.03	51.36	199	156	2396	225	164	787	109	31	8005	-864	1534	16
USNM_045	20.4893	-99.2142	0.59403	1	1	1	45.97	76.6	41.52	48.42	183	173	2479	209	149	386	70	31	3899	-970	1705	1
USNM_134_135_136_137	20.5049	-86.926	0.692999	1	1	1	31.76	63.4125	28.485	38.9925	261	91	1607	278	237	1396	52	240	7248	-987	7	1
AMNH_061	20.5776	-104.433	0.612245	1	1	1	32.77	62.38	45.53	35.77	162	143	1970	184	150	1064	105	61	8425	-842	1937	37
AMNH_052_53_54	20.6541	-102.329	0.534896	1	1	1	39.5067	61.08	33.2667	39.4667	179	162	2455	208	144	950	107	35	7636	-889	1985	16
AMNH_059_60	20.6574	-104.51	0.463878	1	0.90625	1	40.525	65.05	31.225	39.135	230	167	2461	256	204	882	107	39	8220	-839	1003	35
AMNH_055_56_57	20.6598	-103.347	0.505807	1	NA	1	40.3167	60.2233	36.1167	40.8033	197	161	2462	225	162	939	111	37	2014	-359	1546	1
USNM_047_48	20.7187	-103.365	0.524064	1	1	1	45.83	67.12	43.89	42.84	196	163	2431	224	161	952	111	39	3350	-491	1533	1
USNM_081	20.7369	-97.8519	0.507538	1	1	1	43.15	61.22	40.61	40.05	234	112	3257	267	187	1616	65	147	8250	-800	316	20
USNM_050	20.7619	-104.85	0.598266	1	1	1	35.08	62.89	28.79	32.42	185	147	1944	205	163	1286	110	57	7809	-791	1480	36
USNM_068	20.7978	-105.221	0.498489	1	1	1	50.61	69.78	40.49	40.17	257	125	2415	284	225	1166	118	37	8039	-814	33	10
CNMA_013	20.8422	-100.744	0.662687	NA	1	1	50.39	67.64	43.31	40.35	169	151	2296	195	136	632	91	39	6893	-1034	2217	33
USNM_138	20.9335	-89.0166	0.538012	1	1	1	32.44	61.5	24.96	29.71	261	127	2060	281	232	1059	71	96	8249	-837	14	19
USNM_129_131_AMNH_091	20.9747	-89.6131	0.566618	1	0.75	1	36.1133	55.49	38.52	40.21	258	102	1930	276	230	958	70	95	4578	-576	11	1
CNMA_014	21.1403	-100.066	0.501377	1	1	1	36.47	74.72	31.62	42.85	202	171	2647	230	163	471	80	28	4315	-986	1572	2
USNM_070_71	21.1668	-105.227	0.413423	0.989286	1	1	41.72	70.56	40.84	44.77	257	120	2635	287	222	1401	124	43	9418	-1418	15	13
MALH_008	21.2846	-99.4701	0.511696	1	1	1	45.34	66.12	38.3	48.65	227	145	3356	263	180	964	91	56	7533	-882	880	40
MALH_001	21.3325	-99.4364	0.612903	1	0.642857	1	46.64	66.82	33.21	40.46	206	149	2855	235	166	894	87	50	8124	-916	1439	32
USNM_072	21.3849	-105.191	0.507389	1	1	1	45.71	68.59	49.78	43.54	255	117	2757	286	219	1555	125	42	8679	-915	51	67
USNM_065	21.5031	-104.898	0.511475	1	1	1	41.58	66.39	35.08	40.15	213	143	2284	238	181	1289	119	59	3148	-666	942	2
USNM_093_94_95	22.4003	-97.9351	0.489866	1	1	1	50.68	60.53	43.9333	42.2267	239	86	3366	275	191	1002	91	77	6219	-962	16	11
CNMA_043_44_47	22.4382	-99.3057	0.56349	1	0.907407	1	34.03	64.2133	33.9867	35.9533	235	117	3760	273	182	1278	85	66	8127	-846	260	26
USNM_066	22.501	-105.363	0.534884	1	1	1	43.78	57.09	36.4	40.42	248	118	2641	277	212	1337	121	68	7936	-857	30	10
USNM_101	22.6424	-104.102	0.60582	1	1	1	42.83	70.38	47.27	40	215	158	3300	251	168	493	100	51	4621	-930	1221	1
CNMA_048	22.8213	-105.788	0.442577	1	1	1	50.41	66.29	37.41	40.55	249	108	3019	284	209	865	93	67	7038	-938	16	11
AMNH_073_74_75_82_83_84_85_USNM_086	22.8352	-105.787	0.573986	1	1	1	41.7475	61.8125	38.0025	34.6337	250	108	3035	284	209	864	93	68	4975	-938	21	12
USNM_085	23.2697	-106.433	0.491049	1	1	1	55.59	64.91	50.52	45.95	247	97	3175	283	207	785	121	40	7005	-957	15	8
AMNH_086	24.0829	-99.1103	0.723724	1	1	1	46.32	68.44	47.8	39.6	237	138	4686	290	172	727	72	51	5946	-1003	195	9
USNM_158	24.5679	-81.7614	0.334495	1	0.666667	0.833333	51.5	62.63	52.42	34.97	252	60	2904	286	212	1004	46	148	3475	-1408	1	0
CNMA_051	24.6095	-98.7222	0.539157	1	1	1	50.09	63.27	23.6	32.34	206	134	4228	254	148	869	69	90	8582	-1037	829	39
USNM_084	24.7907	-107.387	0.566751	1	1	1	36.79	67.62	32.58	37.54	252	155	3832	296	203	661	116	63	4089	-694	112	2
USNM_036	24.8123	-106.739	0.539474	1	1	1	32.92	61.52	34.63	37.75	239	154	3359	276	193	1063	109	110	8448	-766	633	31
USNM_172	25.4939	-80.4828	0.365696	1	NA	NA	53.04	73.62	52.79	42.21	236	98	3241	274	193	1548	60	134	6846	-821	8	8
MVZ_007	25.5256	-100.308	0.363344	1	1	1	51.38	67.76	27.6	43.77	151	136	2607	181	115	593	79	45	7641	-824	1854	44
CNMA_035	25.6733	-100.342	0.4	NA	1	1	42.8	68.62	39.98	42.3	219	122	4997	277	149	574	76	45	2776	-392	559	2
USNM_061_64	25.7189	-100.405	0.560075	1	1	1	44.655	64.86	42.605	34.145	199	125	4936	257	129	402	85	35	5737	-625	889	3
USNM_144_147_148_149	25.9	-97.4725	0.543085	1	0.933333	1	44.8025	64.3625	30.7425	38.53	231	98	4803	288	165	686	55	107	4895	-832	13	5
AMNH_096	27.1812	-81.3507	0.366883	1	0.5625	1	45.51	60.81	53.61	30.02	222	133	4125	270	165	1253	59	159	7058	-998	45	17
USNM_083	27.2025	-107.712	0.5	1	1	1	50.19	60.37	42.88	44.51	169	180	4280	221	113	968	99	128	7395	-914	1577	24
MVZ_008_9_11_12	27.225	-109.259	0.51568	0.993056	0.852941	1	41.97	68.2475	40.12	45.6125	253	175	5008	313	188	525	120	53	6405	-1008	79	15
AMNH_097_98	27.2673	-81.3641	0.346471	0.959207	0.34375	0.517483	44.855	60.47	47.235	29.73	223	132	4152	272	165	1223	58	160	6784	-1029	32	11
USNM_154_155	27.3247	-81.0348	0.336541	0.922348	0.443277	0.833333	46.96	67.97	56.185	38.915	225	123	4051	273	169	1188	55	152	8574	-1008	14	66
USNM_153	27.3549	-81.0438	0.378378	0.852941	0.642857	1	56.08	74.74	59.66	27.96	225	124	4042	272	169	1194	56	153	7834	-1027	18	36
USNM_157	27.3885	-81.0379	0.356037	NA	0.5	1	52.5	63.21	62.72	37.02	225	123	4087	273	169	1198	56	155	7759	-1046	17	9
USNM_156	27.4337	-81.0345	0.456693	0.947368	0.5	1	45.36	65.59	51.82	29.74	225	123	4063	272	169	1206	55	156	8161	-1041	19	20
AMNH_079	27.7915	-82.6411	0.43956	1	0	1	62.6	70.4	63.6	33.19	225	94	4551	278	162	1227	55	198	5839	-838	14	0
USNM_146	27.7917	-97.3955	0.511834	1	1	1	38.75	63.84	38.06	35.96	221	97	5585	287	144	793	45	134	1936	-808	12	0
USNM_145	27.8368	-97.4925	0.462396	1	0.6	1	41.84	67.95	35.21	26.71	220	105	5676	287	142	798	45	133	7509	-900	5	0
USNM_163_164_171	27.9662	-81.452	0.386836	0.936625	0.488782	0.944444	52.51	66.9833	53.8967	36.4433	224	127	4307	275	165	1220	53	184	7194	-1006	24	28
USNM_190	28.7035	-95.9624	0.379791	0.978571	0.538462	1	60.29	64.93	55.74	38.05	212	95	5902	283	131	1145	32	228	7507	-1146	5	28
USNM_159_161	28.7935	-81.0278	0.385226	NA	0.242857	0.407051	47.59	64.89	53.925	34.655	217	107	4574	271	155	1294	45	196	8991	-998	8	61
AMNH_094	28.7958	-82.5898	0.417625	0.911765	0	1	49.58	65.53	61.53	36.46	212	129	4869	270	147	1363	48	242	8666	-988	15	55
USNM_192	28.9042	-96.1831	0.532468	1	1	1	54.25	69.94	56.33	42.76	208	106	6009	280	126	1115	28	221	7988	-1081	14	33
USNM_087	29.079	-110.947	0.596372	1	1	1	47.39	62.81	44.51	35.54	242	157	5870	314	167	284	114	50	2768	-771	211	1
USNM_165	29.1553	-81.8614	0.32	0.918919	0.642857	1	71.8	73.51	67.87	42.4	209	127	5000	269	142	1288	40	232	7912	-1010	24	57
USNM_142	29.2425	-100.791	0.349432	1	0.6875	1	46.62	66.55	48.73	29.04	213	129	6891	296	120	486	51	55	6435	-1065	266	12
USNM_150_151_152	29.3014	-100.418	0.536597	1	0.762605	1	46.1167	56.7533	47.75	34.5133	202	136	6793	283	109	555	43	73	5314	-1144	347	6
USNM_141	29.3631	-100.929	0.272455	0.975	0.6	0.909091	40.12	67.93	44.62	28.49	212	129	6888	295	119	432	51	49	3638	-963	297	1
AMNH_035_36_38	29.4464	-98.4723	0.370971	0.98374	0	0.544872	57.4233	65.6567	59.84	38.6567	206	121	6590	288	120	696	33	126	5525	-649	215	4
AMNH_092_93	29.639	-82.3221	0.32465	0.806452	0.34375	1	48.905	63.375	55.43	34.255	204	128	5315	268	133	1327	41	275	7919	-873	30	24
USNM_181	29.7022	-92.2117	0.319444	0.975	0	0.636364	55.44	67.55	55.57	42.58	198	101	6135	270	113	1541	25	347	8753	-1132	1	38
USNM_182	29.7065	-91.1955	0.338323	0.971429	0	0	58.03	69.25	59.32	36.96	201	108	5888	272	121	1624	24	381	7592	-901	3	10
USNM_261	29.953	-98.8039	0.332317	1	0.266667	1	49.03	68.1	59.52	41.76	191	136	6625	271	101	792	32	134	7166	-1098	408	8
MVZ_014	30.089	-94.144	0.267123	1	0	0.733333	58.88	67.66	64.44	50.21	197	116	6336	274	111	1425	17	336	5914	-770	13	30
USNM_179	30.2611	-91.991	0.400662	0.948718	0.533333	1	58.56	62.99	51.59	37.33	196	113	6204	271	113	1492	14	386	8540	-862	17	64
USNM_186_187	30.3116	-89.339	0.354265	0.978378	0.4	0.363636	54.295	68.41	55.63	32.9	194	107	6094	268	113	1572	17	411	7510	-1123	10	9
AMNH_099	30.3158	-84.135	0.496622	0.842105	0.466667	1	57.04	69.04	60.11	37.44	196	132	5899	268	118	1482	28	343	8733	-991	19	69
AMNH_100	30.4348	-84.2718	0.573585	0.97561	0	1	60.51	64.19	54.41	44.55	194	131	5965	267	115	1500	26	352	6504	-812	56	8
USNM_262_263	30.7527	-99.2346	0.363423	0.961538	0.266667	1	59.07	68.27	60.705	39.575	181	148	7139	268	84	665	37	97	6692	-1182	476	3
AMNH_076_77	30.779	-84.9508	0.405589	0.940731	0.25	1	60.48	69.665	64.55	42.44	194	134	6143	268	111	1418	22	359	8578	-1017	36	58
AMNH_080	30.8403	-83.9658	0.333333	1	0	0.545455	58.66	67.52	58.1	28.02	193	135	6066	267	112	1368	24	345	7528	-922	89	7
AMNH_078	30.8618	-82.2584	0.426056	NA	0	1	55.41	64.48	52.85	37.28	196	137	5854	267	117	1318	34	284	9624	-881	45	60
AMNH_081	30.8734	-83.8423	0.254019	0.952381	0	0	58.02	74.04	69.8	44.6	194	135	6074	267	112	1336	24	336	9006	-905	68	51
USNM_177	30.9275	-82.2959	0.322188	NA	0.3125	0.285714	66.6	73.16	34.13	40.4	195	136	5924	267	115	1314	33	289	8679	-867	50	82
USNM_176	31.7244	-81.4747	0.378947	0.828571	1	1	60.12	65.85	57.44	36.19	192	116	6238	268	110	1260	34	261	8786	-982	10	72
USNM_189	32.4337	-80.6741	0.366548	0.868421	0.0769231	1	57	62.91	61.6	36.28	186	111	6506	266	99	1274	34	259	4553	-908	8	13
USNM_253	32.7851	-79.8614	0.285211	NA	0.285714	1	53.28	70.22	51.8	45.27	187	95	6480	267	100	1248	32	252	7605	-803	11	29
USNM_265	33.9628	-98.7754	0.305556	NA	0.3125	0.916667	66.03	72.54	67.97	49.56	174	145	8595	282	60	711	40	98	8181	-1218	316	11
USNM_194	33.9951	-87.099	0.232394	NA	0	0	68.98	71.7	72.42	45.1	156	136	7523	250	56	1462	18	415	7866	-996	192	13
MVZ_029	34.056	-117.182	0.33677	0.969697	0	1	63.91	67.64	64.78	40.55	178	163	5383	252	115	313	84	166	2999	-821	425	7
USNM_240_241_242_243_244	34.1517	-98.2789	0.394633	0.965802	0.05	0.402564	63.996	68.758	67.552	50.766	172	142	8531	280	59	782	39	110	7566	-1214	277	8
USNM_196	34.4968	-91.5613	0.258567	1	0	0	54.07	70.29	67.27	42.24	167	117	8031	267	59	1265	20	327	7057	-944	60	8
USNM_251	34.7221	-98.7003	0.273529	NA	0	0.357143	67.24	63.93	63.25	45.95	156	140	8843	267	38	739	40	98	5859	-1150	504	32
USNM_246	34.7678	-98.5921	0.354717	0.894737	0.285714	0	60.49	68.91	66.38	49.21	158	137	8791	269	42	746	42	96	7822	-1151	455	21
USNM_239	34.8473	-95.5668	0.449324	0.979487	0.666667	1	52.56	63.38	61.97	40.65	164	129	8207	266	53	1165	28	193	7028	-1096	225	11
USNM_193	34.8518	-87.5278	0.382253	1	0	0	67.1	71.52	71.99	47.31	154	133	7739	250	51	1396	18	391	8183	-936	181	44
AMNH_025_26_27	35.2212	-75.6867	0.283573	NA	0.0588235	0.111111	56.2267	65.1733	58.5733	38.6067	170	86	6719	253	83	1396	16	333	7620	-2161	3	54
USNM_234	35.3719	-77.964	0.322684	0.944444	0	0	64.08	71.07	63.88	36.95	161	121	7365	254	64	1240	25	276	7971	-804	30	37
AMNH_029_30_31	35.4013	-78.8157	0.357915	0.918803	0	0.707071	61.75	75.0433	53.5067	33.8033	157	127	7467	251	58	1169	18	276	7462	-882	41	7
AMNH_034	35.8097	-83.6374	0.37	NA	0	0.7	63.98	79.04	64.7	28.56	132	135	7577	227	31	1282	14	330	8499	-874	402	71
MVZ_036	35.903	-98.4843	0.30315	NA	NA	NA	65.18	77.45	67.95	42.47	150	136	9117	266	30	722	46	75	5485	-1210	466	2
MVZ_035	36.0816	-80.2506	0.430868	NA	0.4375	1	64.2	81.64	68.89	43.45	147	127	7776	245	44	1134	10	272	6935	-726	245	8
USNM_255	36.2372	-88.0877	0.338816	0.9775	0.769231	1	56.53	56.76	53.18	45.14	143	133	8265	245	30	1342	15	352	7927	-939	123	55
USNM_257	36.3561	-83.4153	0.306897	NA	0	0.384615	64.33	78.22	69.05	41.26	127	133	7789	225	24	1241	14	320	8876	-886	479	39
USNM_227	36.5073	-92.245	0.272222	0.95122	0	0.0666667	72.43	75.2	69.38	37.72	138	141	8608	245	21	1102	18	221	7771	-1018	228	22
USNM_258	36.5385	-87.3601	0.291667	NA	0.5625	0.714286	74.53	79.75	74.75	42.53	143	134	8442	249	30	1271	16	340	7017	-826	137	2
USNM_228	36.6681	-93.3347	0.253788	NA	1	1	69.04	64.12	65.1	42.97	131	135	8551	237	16	1116	21	195	7939	-968	388	39
MVZ_026	36.9841	-120.534	0.355987	NA	0	0.214286	61.84	69.17	69.47	37.02	165	158	6444	246	83	226	82	116	7739	-866	37	18
MVZ_040_41	37.1041	-76.4641	0.274498	1	0	0.685897	55.825	73.39	61.245	41.93	148	100	7765	246	46	1121	16	261	8120	-799	15	30
USNM_270_274	37.2282	-80.3905	0.446963	0.944643	0.544118	1	64.05	71.84	64.34	41.96	112	132	7693	208	6	997	11	210	9120	-881	637	74
USNM_275	37.393	-80.5598	0.374603	NA	0	1	72	68.23	68.92	58.06	91	121	7583	185	-11	1098	11	232	8772	-858	1035	80
USNM_213	37.6801	-84.4181	0.311741	NA	0	0.833333	73.8	76.24	73.18	53.7	129	120	8351	233	17	1207	14	279	8296	-917	292	15
MVZ_016	37.8634	-122.215	0.347826	NA	0.666667	0.571429	69.2	71.89	66.91	48.06	140	111	3764	189	94	721	86	380	7673	-709	337	18
MVZ_015	37.8725	-122.245	0.386525	NA	0	0.571429	64.93	68.89	62.75	47.22	141	103	3342	183	94	690	87	387	8236	-706	205	24
MVZ_018	37.8761	-122.255	0.274194	NA	0	0.5	64.29	71.15	70.12	51.83	140	104	3356	182	101	705	88	348	6933	-806	223	19
MVZ_019	37.8788	-122.266	0.287791	1	0	0.8	62.39	72.53	65.39	40.13	141	95	3016	177	103	644	89	327	6543	-806	119	7
MVZ_020	37.8905	-122.274	0.264085	NA	0	0.846154	60.42	62.14	60.44	44.59	142	93	2964	177	102	625	88	344	6021	-806	100	3
USNM_224_225	38.0678	-75.568	0.270453	0.897436	0	0.63986	70.335	78.475	68.795	44.07	137	103	7899	237	34	1049	14	246	6970	-917	4	4
USNM_266	38.0911	-75.2049	0.327338	0.875	0	0	69.88	76.45	70.19	43.68	136	99	7765	234	35	1067	14	253	4965	-1866	3	12
USNM_205	38.3622	-87.7109	NA	0.972222	0.666667	0.416667	70.73	76.54	70.02	43.45	129	117	9157	243	6	1112	18	233	8761	-866	129	48
USNM_276	38.4292	-82.3368	0.303704	NA	0	0	72.69	71.78	69.34	45.8	121	131	8316	224	9	1094	15	240	9070	-788	238	77
USNM_273	38.7072	-77.156	0.452756	0.944444	0.357143	0.416667	66.28	76.69	70.56	56.64	131	115	8411	236	19	997	11	224	7944	-764	26	42
MVZ_039	38.8822	-77.1714	0.416084	NA	1	1	57.45	65.56	56.68	32.96	127	117	8525	235	14	1033	11	224	7901	-634	99	10
USNM_280	38.9478	-77.4908	0.457386	NA	0.5625	1	61.34	77.32	63.96	39.15	125	124	8507	233	12	1005	11	214	7505	-804	93	3
MVZ_031	38.9633	-95.235	0.338182	1	1	1	63.12	70.91	70.54	44.48	128	117	9674	248	-1	961	45	93	6226	-888	274	0
USNM_215	38.9771	-77.1573	0.334426	0.914286	0.625	0.916667	67.62	75.03	68.21	45.45	129	120	8548	237	15	1020	12	219	8741	-688	53	56
USNM_278	39.0567	-78.9601	0.459627	0.976923	0	1	64.23	78.62	64.92	55.04	114	140	8296	218	1	893	17	171	8475	-905	263	0
AMNH_003_6_5	39.179	-96.5979	0.322365	0.91823	0.28422	0.642857	67.6067	75.1633	68.8167	42.4333	120	130	10015	246	-14	861	52	70	7288	-985	345	5
USNM_237	39.2909	-81.9765	0.488189	NA	1	1	58.24	56.22	56.5	46.64	112	129	8638	219	-5	1028	17	212	9022	-821	250	82
MVZ_025	39.4184	-122.163	0.422053	NA	0	1	64.96	70.54	60.65	42.08	159	154	6266	238	81	456	83	246	6861	-1227	25	24
MVZ_037	39.4397	-83.8367	0.254144	0.969697	0	1	63.88	70.58	58.92	48.26	111	109	8962	222	-10	1039	19	212	8279	-865	310	30
USNM_206	40.2906	-85.4233	0.327044	NA	0	0.285714	70.83	77.54	66.69	47.54	100	111	9578	218	-30	957	20	178	8639	-838	277	1
AMNH_001	40.3808	-84.8649	0.432927	NA	0.5	1	53.15	61.76	63.73	41.43	98	114	9501	215	-30	933	22	169	7628	-872	296	0
USNM_207	40.4298	-86.9533	0.408602	1	0.714286	1	74.8	70.33	78.05	45.16	102	115	9687	220	-30	946	24	162	8384	-841	204	21
MVZ_033	40.5105	-96.1637	0.395683	1	1	1	75.07	77.73	67.5	50.6	107	134	10407	237	-33	819	48	70	7319	-922	329	1
AMNH_011	40.6707	-74.2088	0.318328	0.71875	0	0.416667	50.01	63.9	61.76	41.21	118	105	8784	229	2	1181	11	260	3739	-396	11	14
AMNH_012	40.7168	-74.0114	0.33829	0.757576	0	0.454545	60.83	66.58	64.14	38.78	121	88	8735	232	7	1146	10	256	1897	-250	6	0
USNM_208	40.7461	-86.171	0.287402	0.96875	0	0.538462	69.4	75.22	65.7	51.76	99	115	9654	218	-33	949	22	170	8268	-844	196	11
USNM_209	40.8402	-85.7313	0.222222	0.96	0	0.214286	70.94	75.53	71.37	56.34	97	118	9564	215	-34	965	21	174	8046	-859	219	24
MVZ_034	40.8619	-96.6701	0.269663	NA	1	1	71.63	75.18	71.41	47.61	107	126	10651	241	-36	749	52	59	5950	-809	347	1
AMNH_018	40.9587	-72.9922	0.346021	0.84375	1	1	58.93	68.07	65.85	35	108	97	8370	214	-1	1153	8	281	8342	-1360	38	23
AMNH_016_17	41.1181	-73.7984	0.375658	0.764286	0.539216	1	67.25	77.255	68.765	39.68	102	104	8808	213	-12	1245	8	279	9009	-867	149	71
AMNH_024	41.2737	-73.7743	0.277193	0.818182	0	0.75	64.03	72.2	65.89	41.27	100	111	8849	212	-17	1207	8	270	9072	-830	148	38
AMNH_021	41.2927	-73.6692	0.399381	NA	0	1	63.92	73.6	68.58	35.17	102	114	8825	213	-15	1188	8	269	8593	-862	97	53
AMNH_013_15	41.3322	-73.9871	0.298113	0.9375	0	0.454545	62.505	65.73	64.53	39.805	105	115	9020	219	-17	1165	9	258	7577	-923	48	78
AMNH_007	41.9376	-85.0112	0.397683	0.96875	0.6875	0.5	60.32	67.05	62.57	51.07	86	111	9520	204	-41	896	23	151	7061	-887	295	1
AMNH_014	42.6673	-74.3193	0.34	NA	0.375	1	61.19	69.96	65.53	43.02	80	119	9466	198	-47	985	14	200	7418	-954	185	62
