# Supplementary material for: Playing by the rules? Phenotypic adaptation to temperate environments in an American marsupial
Source: PeerJ journal article supplement (doi:10.7717/peerj.4512), 2018-03-27

**A**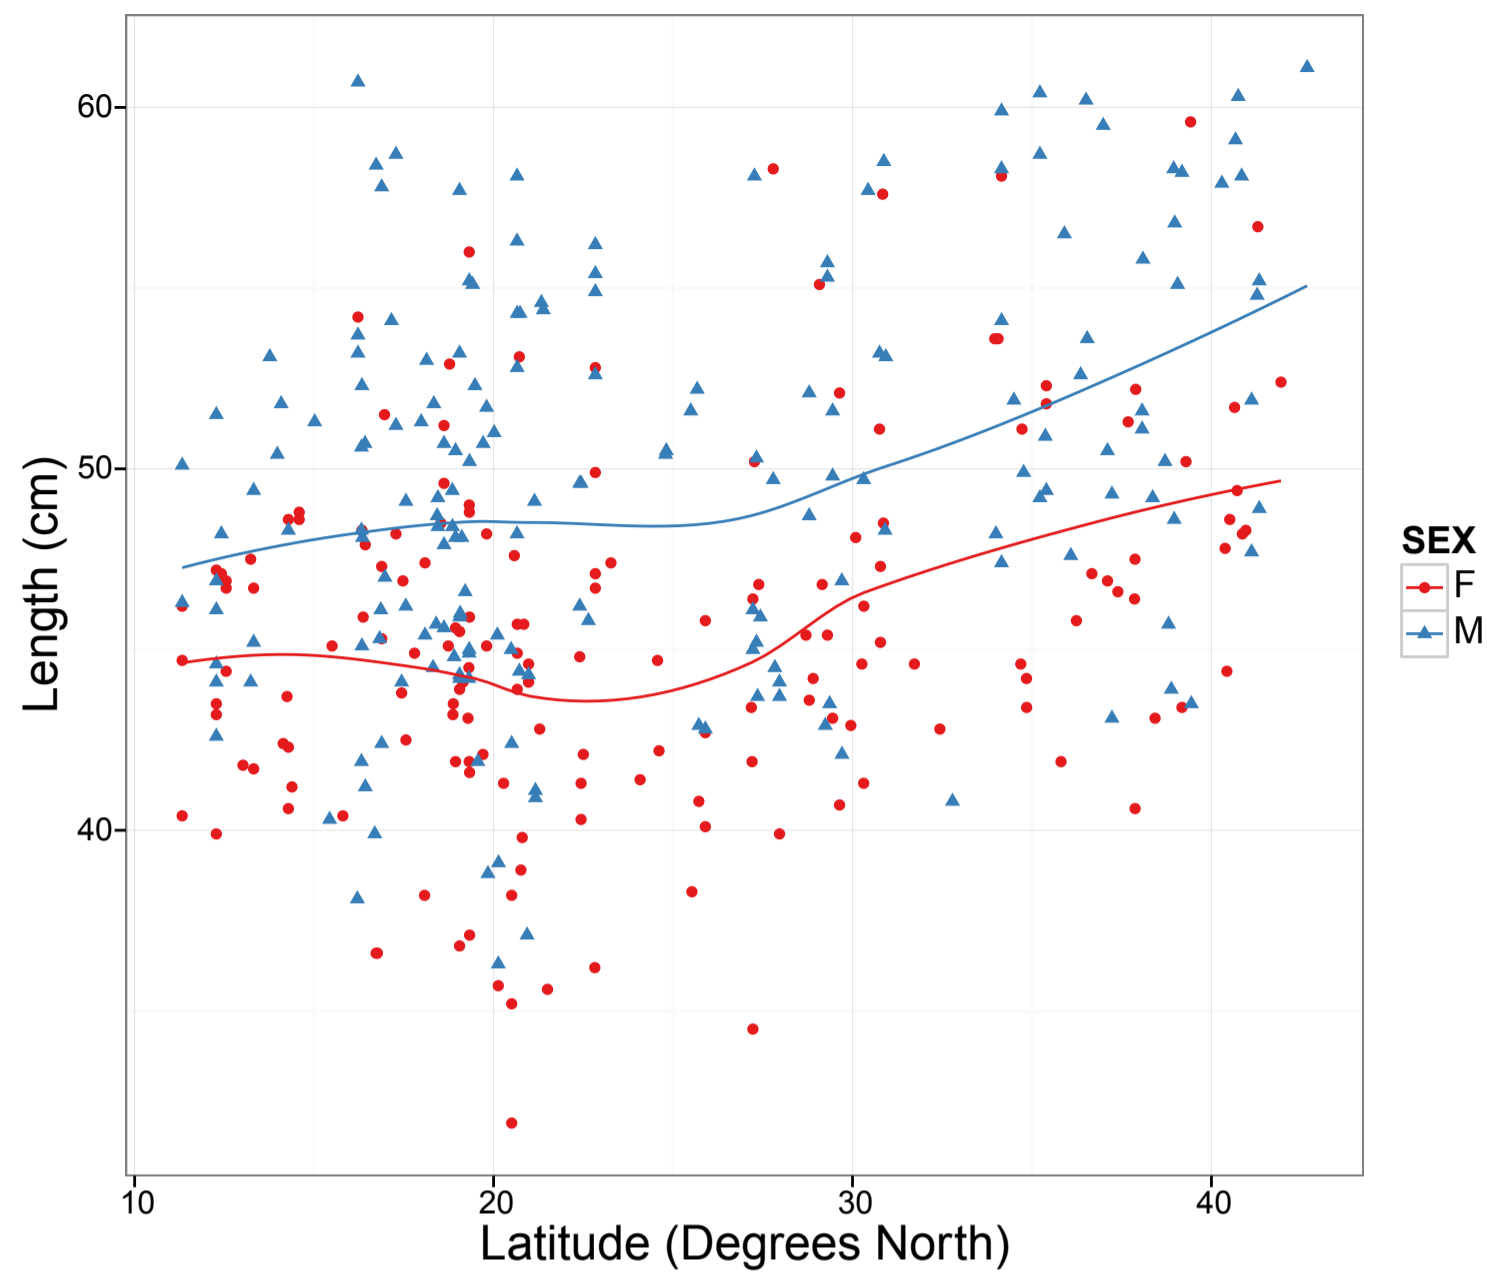**B**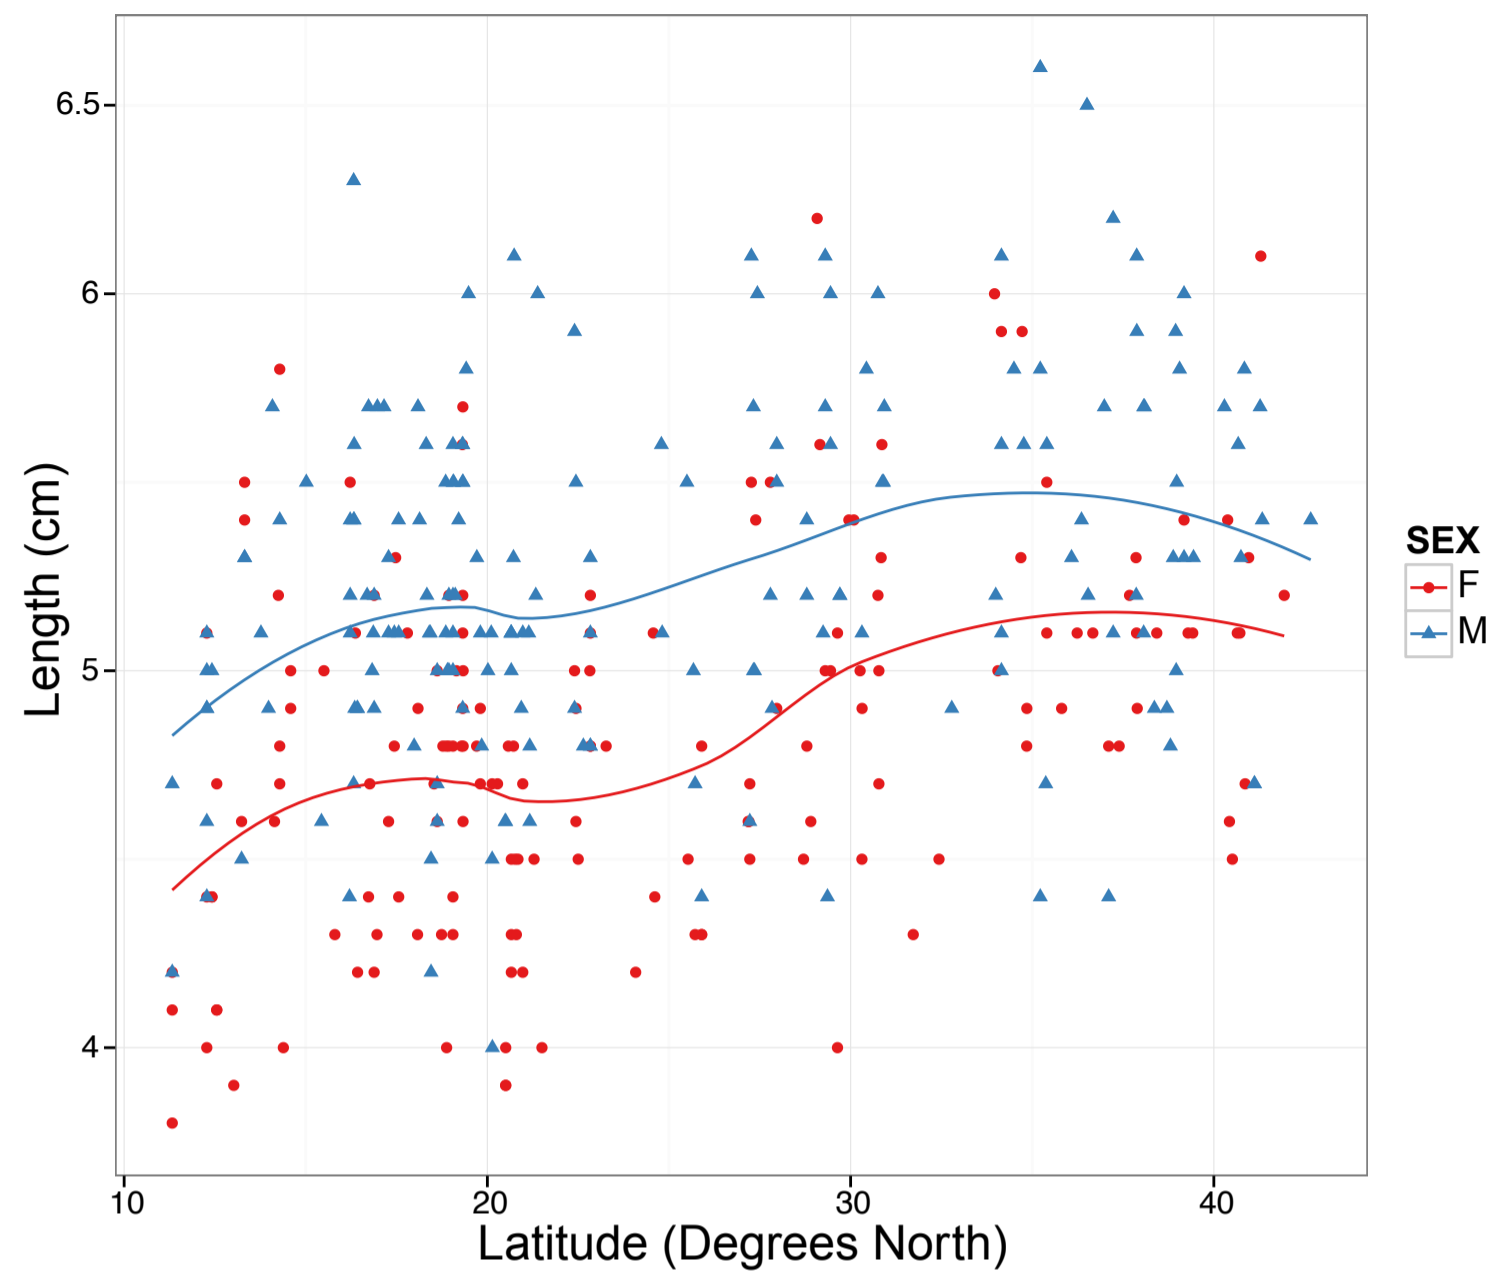**C**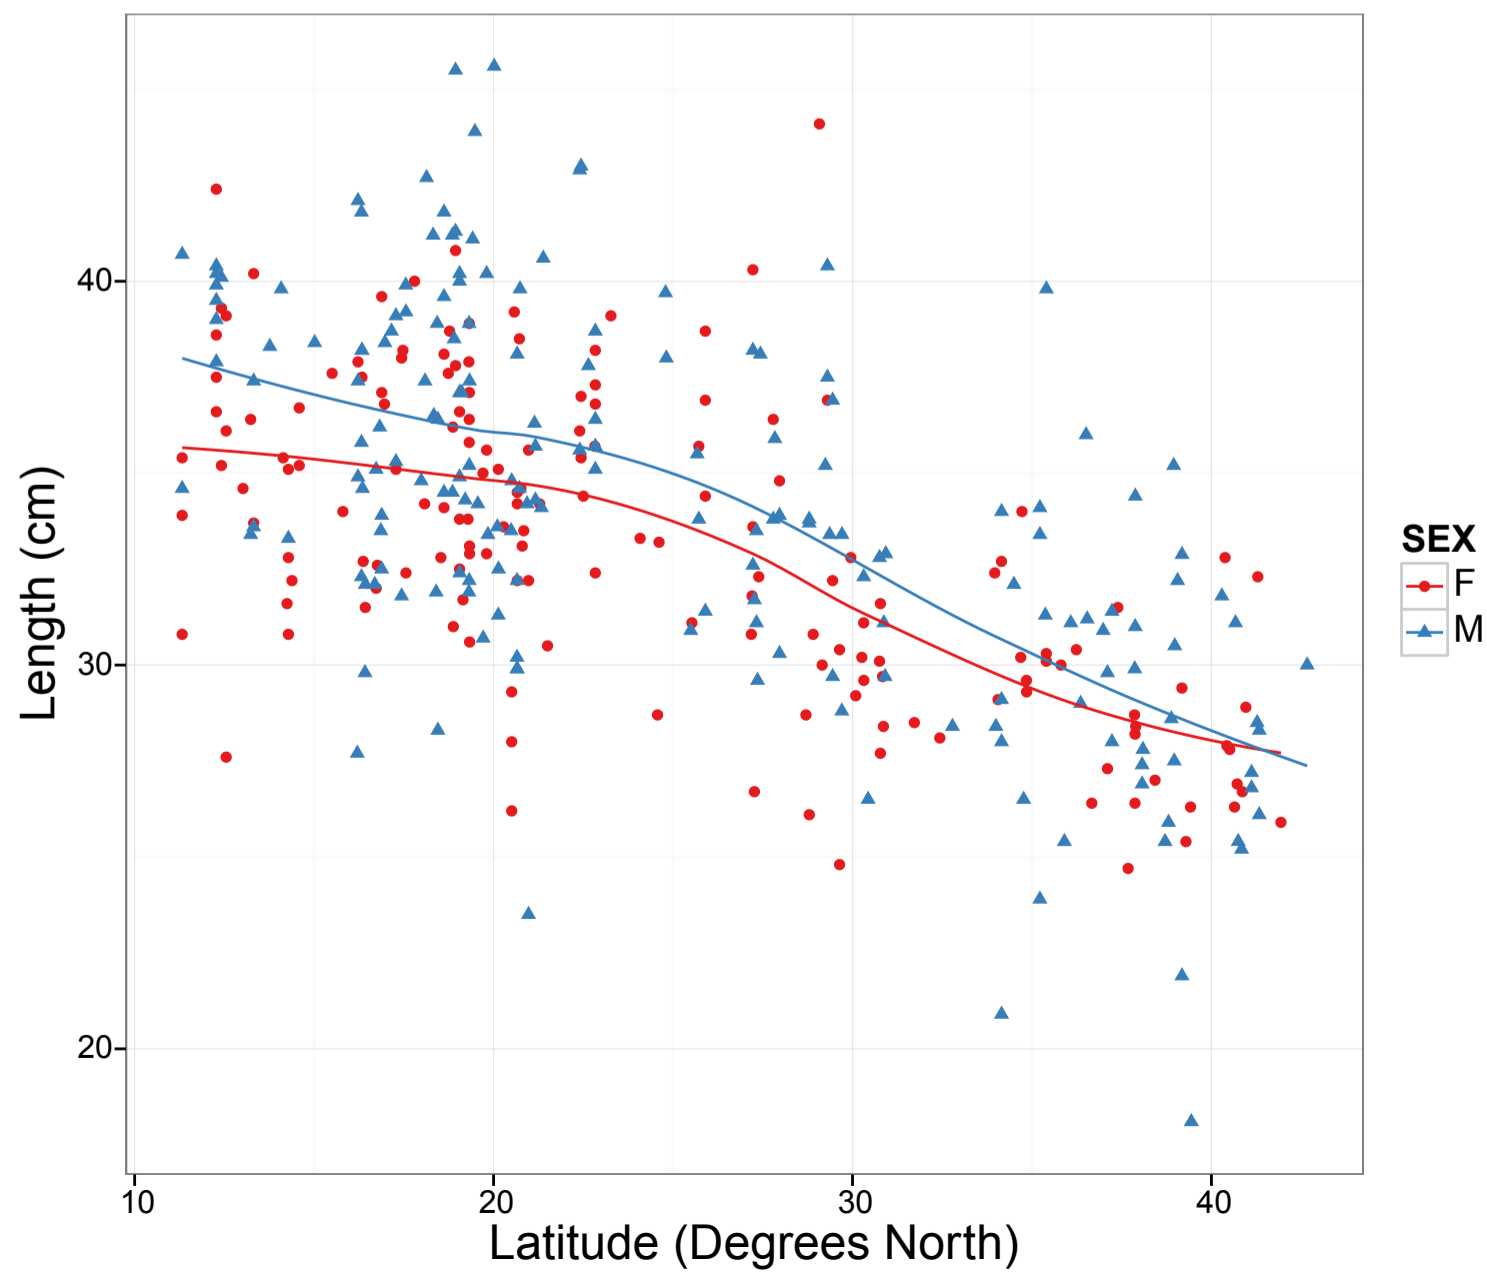**D**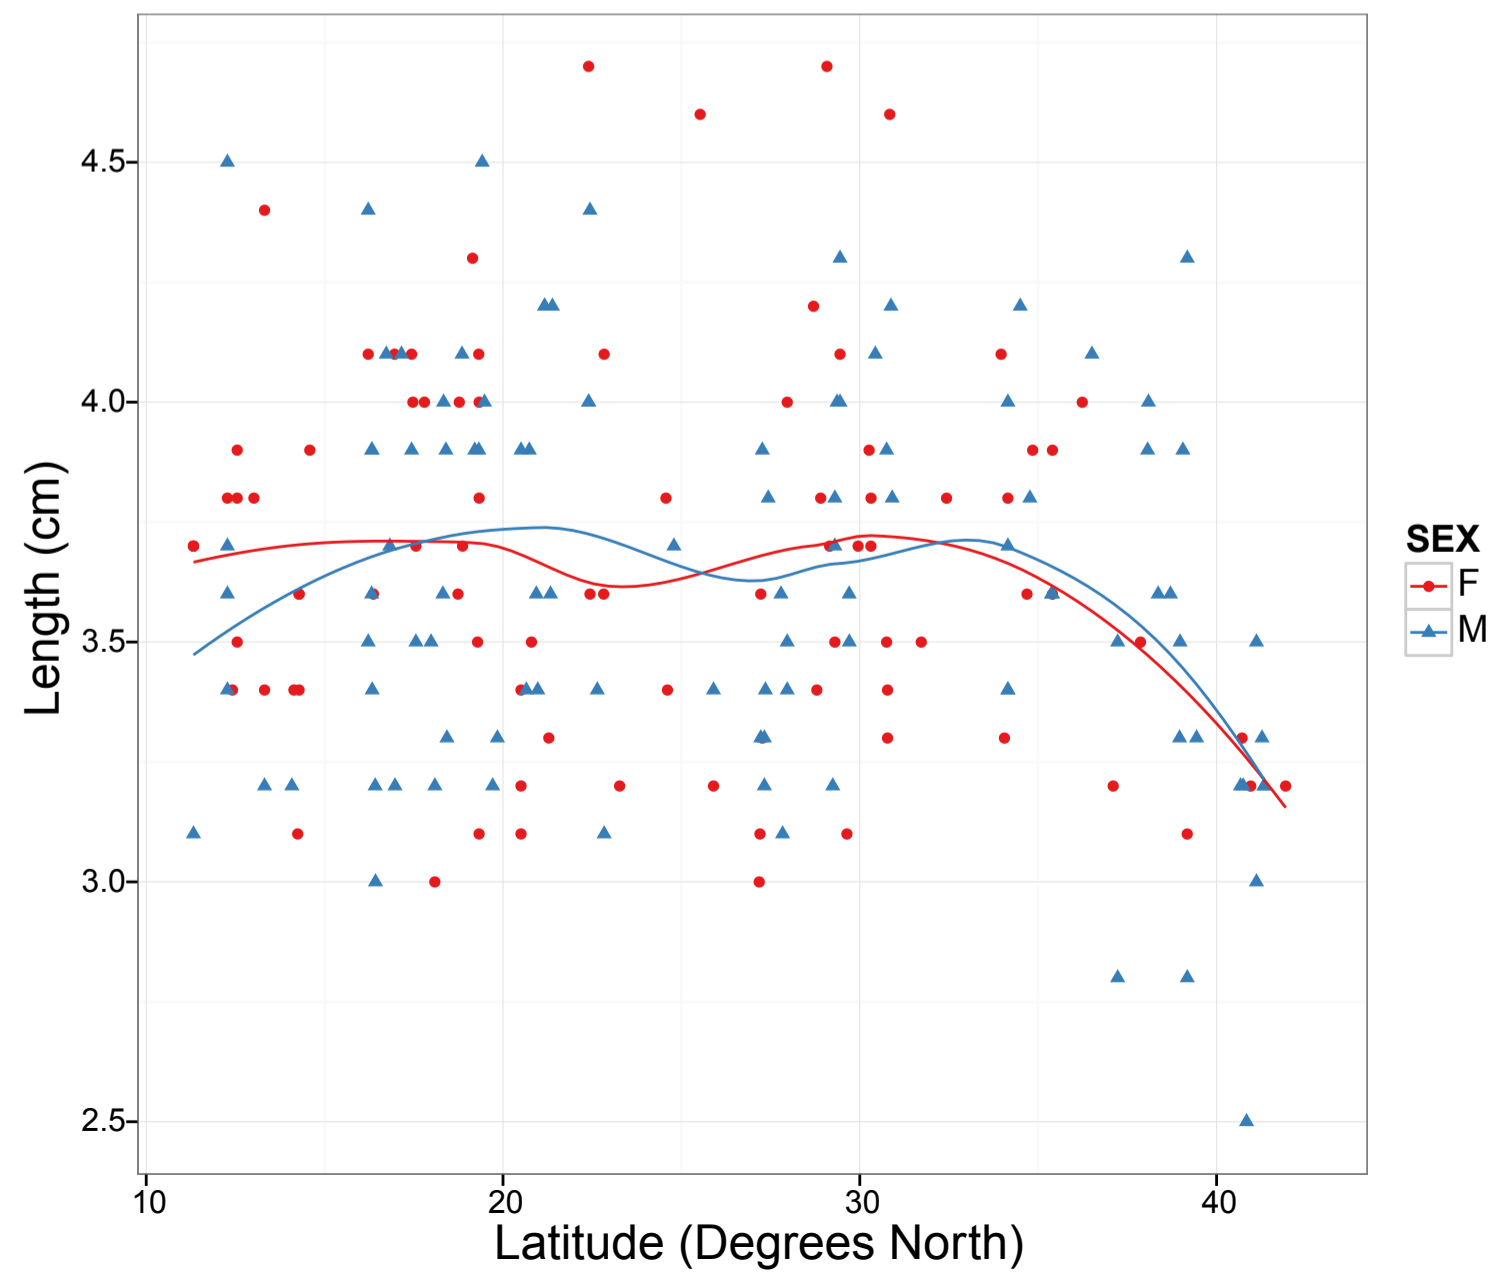

Supplement: Supplemental_Figure_S1.pdf [file Supplemental_Figure_S1.pdf]
